# Supplementary material for: Synthesis of spiroindolenine–cyclopentenedione skeletons and their chemical behaviours: the first example of a lactone-type spiroindolenine structure
Source: Royal Society of Chemistry journal article supplement (doi:10.1039/d2ob00396a), 2022-01-01
Supplement: d2ob00396a1.pdf [file d2ob00396a1.pdf]

## Supporting Information

### Synthesis of Spiroindolenine-cyclopentenedione Skeletons and Their Chemical Behaviors: First Example of Lactone-type spiroindolenine structure

Meltem Tan Uygun<sup>1,2\*</sup> and Nurettin Menges<sup>1,2\*</sup>

<sup>1</sup>Pharmaceutical Chemistry Section, Van Yuzuncu Yil University, 65080, Van, Turkey

<sup>2</sup>SAFF Chemical Reagent R&D Laboratory, YYU-TEKNOKENT, 65080, Van, Turkey

Email: [meltemtan@yyu.edu.tr](mailto:meltemtan@yyu.edu.tr); [nurettinmenges@yyu.edu.tr](mailto:nurettinmenges@yyu.edu.tr)

### Table of Contents

|                                                                                                                |     |
|----------------------------------------------------------------------------------------------------------------|-----|
| 1. General information.....                                                                                    | S2  |
| 2. Figure S1. Visual representation of the cyclization reaction.....                                           | S3  |
| 3. Scheme S1. General procedure for synthesis of 4a-e.....                                                     | S3  |
| 4. Scheme S2. The plausible reaction mechanism for spiroindolenine.....                                        | S5  |
| 5. Scheme S3. General procedure for synthesis of 5a-c.....                                                     | S6  |
| 6. Scheme S4. General procedure for synthesis of 5d-f.....                                                     | S8  |
| 7. Scheme S5. General procedure for synthesis of 7a-k.....                                                     | S9  |
| 8. Scheme S6. The reaction attempt of indole-3-butyric acid and 1,2-diamino<br>benzene (cat: AcOH or TFA)..... | S9  |
| 9. Scheme S7. Possible tautomerizations of 7a-k.....                                                           | S10 |
| 10. Copies of <sup>1</sup> H-NMR and <sup>13</sup> C-NMR spectra.....                                          | S15 |
| 11. Copies of LC/MS spectra.....                                                                               | S37 |

#### 1. General information

All solvents were dried and distilled using standard procedures. Unless otherwise noted, reagents were obtained from commercial sources and used without further purification.  $^1\text{H}$  NMR and  $^{13}\text{C}$  NMR were recorded in deuterated chloroform and dimethyl sulfoxide ( $\text{CDCl}_3$  and  $\text{d}_6\text{-DMSO}$ ). Coupling constants are recorded in hertz, and chemical shifts are recorded as  $\delta$  values in ppm. The following abbreviations are used to describe multiplicities: s = singlet, d = doublet, dd = double doublet, t = triplet, m = multiplet. High-resolution mass spectra were carried out on a mass spectrometer with a TOF analyzer (ESI). Infrared spectra were recorded on a FT-IR spectrometer. Melting points were determined by using a local hot-stage melting point apparatus and are uncorrected.

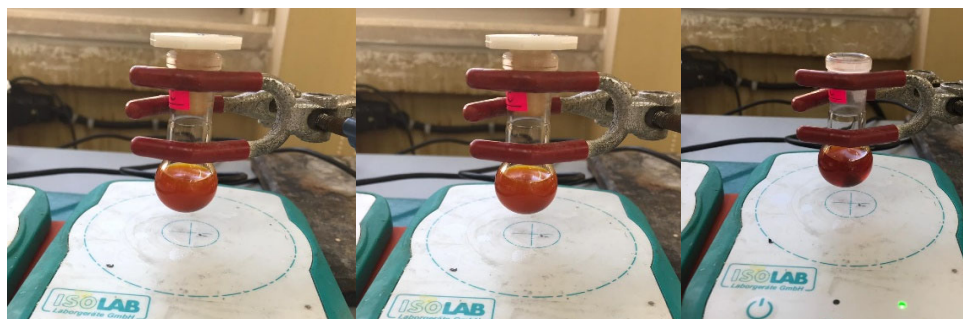

1

2

3

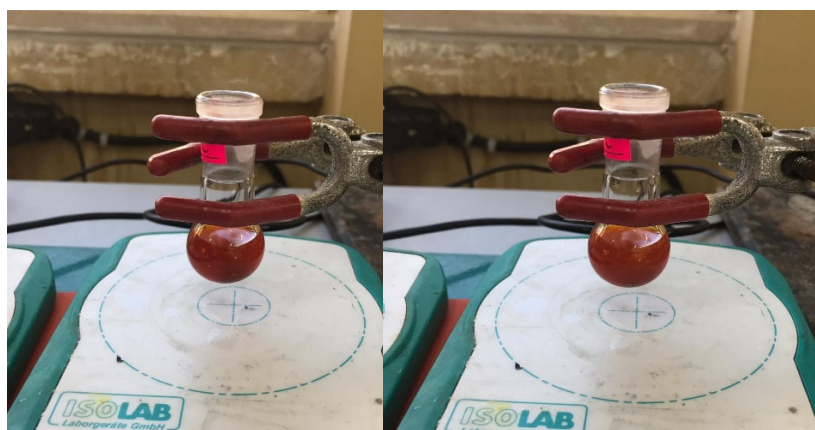

4

5

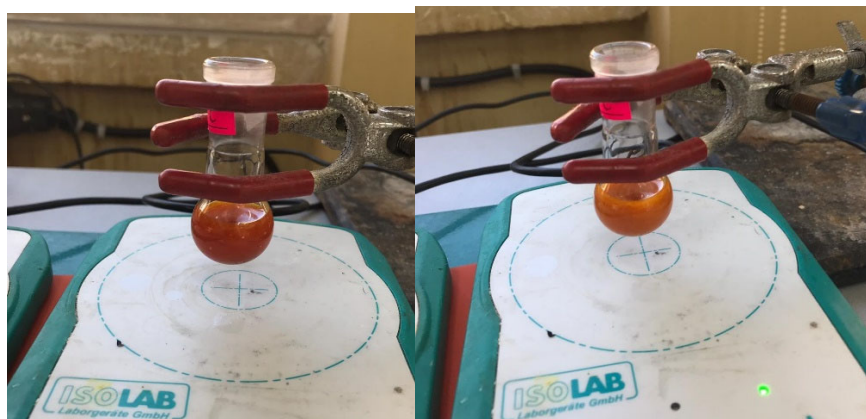

6

7

**Figure S1.** Visual representation of the cyclization reaction.

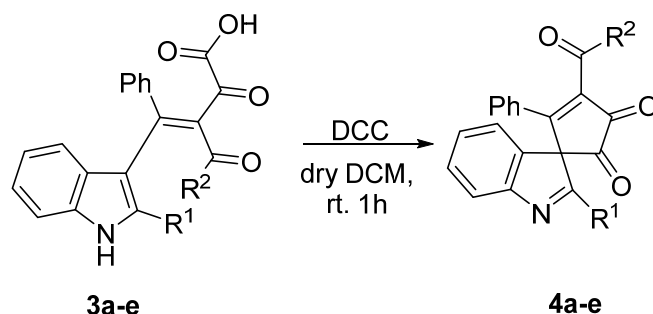

**Scheme S1.** General procedure for synthesis of **4a-e**

In a 50 mL single neck flask, the corresponding indole-3-butenoic acid derivative (1 mmol) was dissolved in anhydrous DCM (10 mL). Then DCC (1.3 mmol) was added to the mixture and the resulting solution was stirred at room temperature for 1h. After completion of the reaction, the crude reaction mixture was refrigerated for 1 h and filtered to remove DCU and then concentrated under reduced pressure. This crude residue was dissolved in dry ether (10 mL), and it was crystallized during refrigeration.

Ethyl 4,5-dioxo-2,2'-diphenylspiro[cyclopentane-1,3'-indol]-2-ene-3-carboxylate (**4a**)

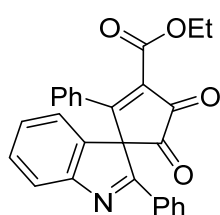

Orange crystal (165-167 °C), Yield 88% (708 mg); **<sup>1</sup>H NMR (400 MHz, CDCl<sub>3</sub>)** δ 7.84 (dt, *J*=0.8 and 7.8 Hz, 1H, Ar-H), 7.76-7.73 (m, 2H, Ar-H), 7.54 (td, *J*=1.5 and 7.3, 1H, Ar-H), 7.40 (tt, *J*= 1.5 and 7.3, 1H, Ar-H), 7.37-7.24 (m, 5H, Ar-H), 7.19-7.14 (m, 2H, Ar-H), 6.99-6.96 (m, 2H, Ar-H), 4.39 (dq, *J*=2.2 and 7.2 Hz, 2H, OCH<sub>2</sub>), 1.27 (t, *J*=7.2 Hz, 3H, CH<sub>3</sub>). **<sup>13</sup>C NMR (100 MHz, CDCl<sub>3</sub>)** δ 190.8, 182.4, 173.5, 171.5, 163.4, 156.0, 138.1, 137.9, 133.3, 132.0,

131.9, 131.2, 130.9, 129.3, 129.3, 128.0, 127.9, 127.5, 122.6, 121.7, 71.6, 62.6, 14.1. **HRMS** calculated for  $[C_{27}H_{19}NO_4+H]^+$  422.1387, Found 422.1393.

Ethyl 2'-methyl-4,5-dioxo-2-phenylspiro[cyclopentane-1,3'-indol]-2-ene-3-carboxylate (**4b**)

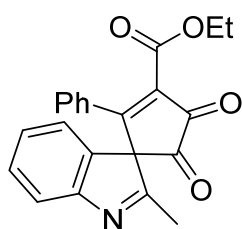

Green-yellow solid (152-155 °C), Yield 86% (761 mg); **<sup>1</sup>H NMR (400 MHz, CDCl<sub>3</sub>)** δ 7.70 (d, *J*=7.8 Hz, 1H, Ar-H), 7.49 (td, *J*=1.3 and 7.6 Hz, 1H, Ar-H), 7.44 (tt, *J*=1.2 and 7.5 Hz, 1H, Ar-H), 7.30-7.22 (m, 3H, Ar-H), 7.18 (ddd, *J*=0.6, 1.3 and 7.5 Hz, 1H, Ar-H), 7.02-7.00 (m, 2H, Ar-H), 4.39 (q, *J*=7.1 Hz, 2H, OCH<sub>2</sub>), 2.18 (s, 3H, CH<sub>3</sub>), 1.29 (t, *J*=7.1, 3H, CH<sub>3</sub>).

**<sup>13</sup>C NMR (100 MHz, CDCl<sub>3</sub>)** δ 192.1, 182.1, 175.7, 169.8, 163.4, 156.6, 139.8, 137.5, 133.5, 131.1, 130.6, 129.5, 127.9, 127.1, 122.3, 121.7, 73.5, 62.7, 17.8, 14.1. **HRMS** calculated for  $[C_{22}H_{17}NO_4+H]^+$  360.1230, Found 360.1235.

3-benzoyl-2,2'-diphenylspiro[cyclopentane-1,3'-indol]-2-ene-4,5-dione (**4c**)

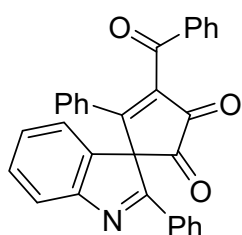

Brick coloured solid (156-158 °C), Yield 82% (552 mg); **<sup>1</sup>H NMR (400 MHz, CDCl<sub>3</sub>)** δ 7.92-7.89 (m, 3H, Ar-H), 7.85-7.82 (m, 2H, Ar-H), 7.63-7.57 (m, 2H, Ar-H), 7.47-7.34 (m, 7H, Ar-H), 7.22 (t, *J*=1.2 and 7.5 Hz, 1H, Ar-H), 7.06-7.02 (m, 2H, Ar-H), 6.96-6.93 (m, 2H, Ar-H). **<sup>13</sup>C NMR (100 MHz, CDCl<sub>3</sub>)** δ 192.1, 191.1, 183.9, 173.9, 169.8, 156.0, 144.4,

138.4, 135.3, 134.9, 133.4, 132.1, 132.0, 131.2, 130.9, 129.5, 129.5, 129.4, 129.3, 128.6, 128.0, 127.6, 122.8, 121.6, 71.9. **HRMS** calculated for  $[C_{31}H_{20}NO_3 +H]^+$  = 454.1443, Found  $[M+H]^+$  = 454.1439.

Ethyl 4,5-dioxo-2'-phenyl-2-(thiophen-2-yl)spiro[cyclopentane-1,3'-indol]-2-ene-3-carboxylate (**4d**)

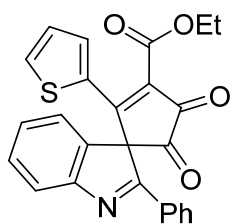

Brick coloured solid (157-159 °C), Yield 80%; **<sup>1</sup>H NMR (400 MHz, CDCl<sub>3</sub>)** δ 7.87 (dt, *J*=0.7, 7.8 Hz, 1H, Ar-H), 7.83-7.80 (m, 2H, Ar-H), 7.64 (dd, *J*=1.1, 5.0 Hz, 1H, Thp-H), 7.53 (ddd, *J*=2.0, 6.8, 7.8 Hz, 1H, Ar-H), 7.45-7.41 (m, 1H, Ar-H), 7.40-7.35 (m, 2H, Ar-H), 7.28-7.23 (m, 2H, Ar-H), 7.20 (dd, *J*=1.1, 4.1 Hz, 1H, Thp-H), 6.94 (dd, *J*=4.1, 5.0 Hz, 1H, Thp-H),

4.55 (q, *J*=7.12 Hz, 2H, -OCH<sub>2</sub>), 1.46 (t, *J*=7.1 Hz, 3H, CH<sub>3</sub>). **<sup>13</sup>C NMR (100 MHz, CDCl<sub>3</sub>)** δ 190.3, 181.8, 173.9, 163.7, 159.9, 155.6, 138.1, 137.2, 135.1, 134.3, 132.9, 131.9, 131.8, 130.7, 129.4, 129.3, 127.7, 127.3, 122.5, 121.5, 71.3, 62.9, 14.1. **HRMS** Calculated for  $[C_{25}H_{17}NO_4S+Na]^+$  450.0771, Found 450.0776.

Ethyl 2-(naphthalen-2-yl)-4,5-dioxo-2'-phenylspiro[cyclopentane-1,3'-indol]-2-ene-3-carboxylate (**4e**)

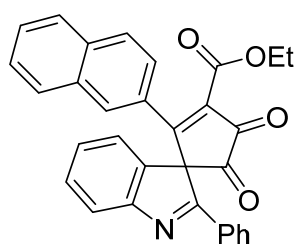

Dark yellow solid (142-144 °C), Yield 92%; <sup>1</sup>H NMR (400 MHz, CDCl<sub>3</sub>) δ 7.89 (dt, *J*=0.9, 7.9 Hz, 1H, Ar-H), 7.80-7.77 (m, 2H, Ar-H), 7.70 (dd, *J*=0.6, 8.1 Hz, 1H, Ar-H), 7.63 (d, *J*=8.8 Hz, 1H, Ar-H), 7.59-7.55 (m, 2H, Ar-H), 7.54-7.49 (m, 2H, Ar-H), 7.45-7.42 (m, 1H, Ar-H), 7.39-7.34 (m, 2H, Ar-H), 7.34-7.30 (m, 3H, Ar-H), 7.04 (dd, *J*=2.0, 8.7 Hz, 1H, Ar-H), 4.47-4.39 (m, 2H, -OCH<sub>2</sub>), 1.28 (t, *J*=7.1 Hz, 3H, CH<sub>3</sub>). <sup>13</sup>C NMR (100 MHz, CDCl<sub>3</sub>) δ 190.6, 182.2, 173.6, 170.8, 163.6, 155.8, 138.0, 137.9, 135.1, 132.4, 131.9, 131.7, 130.8, 129.8, 129.4, 129.2, 129.1, 129.0, 128.4, 127.7, 127.6, 127.4, 127.2, 123.7, 122.5, 121.6, 71.6, 62.6, 14.1. HRMS Calculated for [C<sub>31</sub>H<sub>21</sub>NO<sub>4</sub>+Na]<sup>+</sup> 494.1363, Found 494.1370.

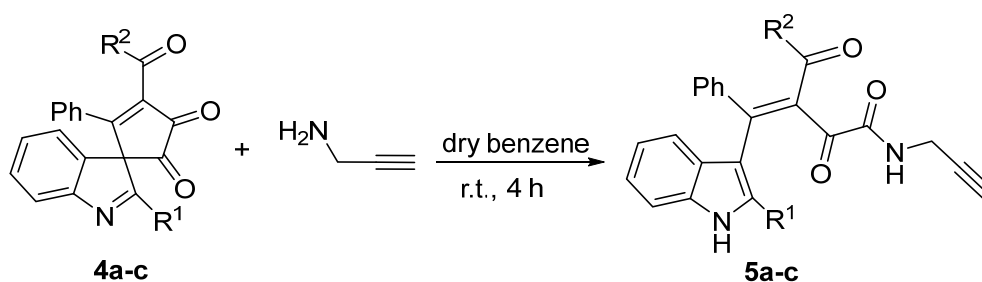

**Scheme S3.** General procedure for synthesis of **5a-c**

In a 50 mL single neck flask, the corresponding spiroindolenine (**4a-c**) (1 mmol) was dissolved in anhydrous benzene (10 mL). Then propargyl amine (1 mmol) was added to the mixture and the resulting solution was stirred at room temperature for 4h. After completion of the reaction, the crude reaction filtered and compounds **5a-c** obtained without any purification.

Ethyl 3,4-dioxo-2-(phenyl(2-phenyl-1*H*-indol-3-yl)methylene)-4-(prop-2-yn-1-ylamino)butanoate (**5a**)

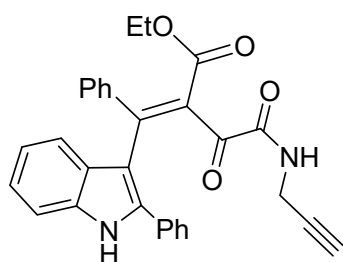

Claret red (112-114 °C), Yield 71% (160 mg); <sup>1</sup>H NMR (400 MHz, CDCl<sub>3</sub>) δ 9.17 (bs, 0.6H, NH-indole), 9.03 (bs, 0.4H, NH-indole), 7.58-7.56 (m, 1H, Ar-H), 7.49-7.47 (m, 1H, Ar-H), 7.42-7.39 (m, 1H, Ar-H), 7.34 (tt, *J*=1.3 Hz and 7.5 Hz, 1H, Ar-H), 7.30-7.15 (m, 7H, Ar-H), 7.13-7.08 (m, 1H, Ar-H), 6.99-6.92 (m,

2H, Ar-H), 6.88 (t,  $J=5.6$  Hz, 0.4H, NH-amide), 6.29 (t,  $J=5.6$  Hz, 0.6H, NH-amide), 4.09-4.00 (m, 1.2H, OCH<sub>2</sub>), 3.91 (ddd,  $J=2.6, 5.6$  and  $17.5$  Hz, 0.8H, CH<sub>2</sub>-propargyl), 3.82-3.61 (m, 0.8H, OCH<sub>2</sub>), 3.51 (ddd,  $J=2.6, 5.6$  and  $17.5$  Hz, 1.2H, CH<sub>2</sub>-propargyl), 2.21 (t,  $J=2.6$  Hz, 0.4H, CH), 2.19 (t,  $J=2.6$  Hz, 0.6H, CH), 1.00 (t,  $J=7.1$  Hz, 1.8H, CH<sub>3</sub>), 0.81 (t,  $J=7.1$  Hz, 1.2H, CH<sub>3</sub>). <sup>13</sup>C NMR (100 MHz, CDCl<sub>3</sub>)  $\delta$  190.2, 188.3, 167.2, 166.0, 160.8, 160.5, 156.9, 155.4, 141.7, 140.4, 140.0, 139.3, 136.4, 136.2, 131.5, 130.8, 130.7, 130.3, 129.9, 129.0, 128.8, 128.7, 128.6, 128.4, 128.3, 128.3, 128.3, 128.2, 123.3, 122.8, 121.4, 121.0, 120.3, 120.0, 113.1, 113.1, 111.7, 111.6, 78.5, 78.3, 72.3, 72.1, 61.2, 61.0, 29.1, 28.8, 13.7, 13.6. HRMS calculated for [C<sub>30</sub>H<sub>24</sub>N<sub>2</sub>O<sub>4</sub>+H]<sup>+</sup> 477.1809, Found 477.1812.

Ethyl 2-((2-methyl-1*H*-indol-3-yl)(phenyl)methylene)-3,4-dioxo-4-(prop-2-yn-1-ylamino)butanoate (**5b**)

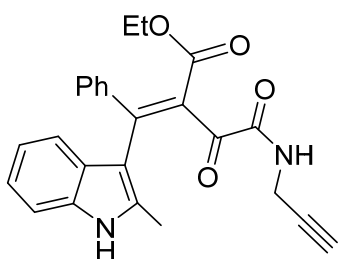

Yellow solid (182-184 °C), Yield 75% (86.6 mg); <sup>1</sup>H NMR (400 MHz, d<sub>6</sub>-DMSO)  $\delta$  11.68 (bs, 0.4H, NH-indole), 11.65 (bs, 0.6H, NH-indole), 8.98 (t,  $J=5.8$  Hz, 0.4H, NH-amide), 8.75 (t,  $J=5.8$  Hz, 0.6H, NH-amide), 7.48-7.25 (m, 5.4 H, Ar-H), 7.12 (d,  $J=7.2$  Hz, 0.6H, Ar-H), 7.04-6.98 (m, 1H, Ar-H), 6.84 (t,  $J=7.3$  Hz, 0.4H, Ar-H), 6.78 (t,  $J=7.4$  Hz, 0.6H, Ar-H), 6.64 (d,  $J=8.0$  Hz, 0.4H, Ar-H), 6.55 (d,  $J=8.0$  Hz, 0.6H, Ar-H), 3.94 (q,  $J=7.1$  Hz, 2H, OCH<sub>2</sub>), 3.82-3.80 (m, 0.8H, CH<sub>2</sub>-propargyl), 3.46-3.38 (m, 1.2H, CH<sub>2</sub>-propargyl), 3.11 (t,  $J=2.4$  Hz, 0.4H, CH), 2.96 (t,  $J=2.4$  Hz, 0.6H, CH), 2.11 (s, 2H, CH<sub>3</sub>-indole), 2.07 (s, 1H, CH<sub>3</sub>-indole), 0.95 (t,  $J=7.1$  Hz, 1H, CH<sub>3</sub>), 0.90 (t,  $J=7.1$  Hz, 2H, CH<sub>3</sub>). <sup>13</sup>C NMR (100 MHz, d<sub>6</sub>-DMSO)  $\delta$  189.3, 167.0, 165.9, 162.7, 162.6, 155.7, 141.5, 140.7, 140.2, 136.5, 136.0, 134.9, 130.4, 130.4, 130.3, 129.9, 128.9, 128.7, 128.0, 127.7, 127.1, 122.1, 120.4, 119.9, 119.0, 113.4, 113.2, 111.5, 80.6, 80.5, 73.5, 73.2, 60.7, 28.5, 28.2, 14.0, 13.9, 13.1, 13.0. HRMS calculated for [C<sub>25</sub>H<sub>22</sub>N<sub>2</sub>O<sub>4</sub>+H]<sup>+</sup> 415.1652, Found 415.1654.

3-benzoyl-2-oxo-4-phenyl-4-(2-phenyl-1*H*-indol-3-yl)-*N*-(prop-2-yn-1-yl)but-3-enamide (**5c**)

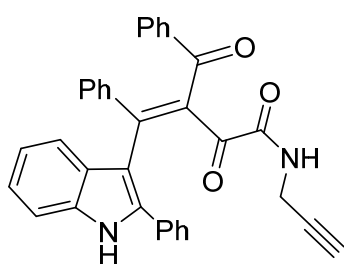

Orange solid (204-207 °C), Yield 78% (80.6 mg); <sup>1</sup>H NMR (400 MHz, d<sub>6</sub>-DMSO)  $\delta$  11.97 (bs, 0.45H, NH-indole), 11.54 (bs, 0.55H, NH-indole), 9.08 (t,  $J=5.9$  Hz, 0.55H, NH-amide), 8.59 (t,  $J=5.8$  Hz, 0.45H, NH-amide), 7.81-7.79 (m, 0.55H, Ar-H), 7.56-7.29 (m, 9.55H, Ar-H), 7.26-6.96 (m, 6.45H, Ar-H), 6.92-6.80 (m, 2H, Ar-H), 6.62 (d,  $J=7.9$  Hz, 0.45H, Ar-H), 3.77-3.74 (m, 1H,

CH<sub>2</sub>-propargyl), 3.59-3.41 (m, 1H, CH<sub>2</sub>-propargyl), 3.10 (t, *J*=2.4 Hz, 0.55H, CH), 3.03 (t, *J*=2.4 Hz, 0.45H, CH). <sup>13</sup>C NMR (100 MHz, CDCl<sub>3</sub>) δ 195.7, 194.8, 191.3, 189.9, 160.8, 160.7, 141.6, 141.3, 139.5, 139.0, 137.5, 136.9, 136.2, 136.1, 136.1, 135.9, 132.7, 131.2, 131.0, 130.7, 130.7, 130.5, 130.2, 129.7, 129.2, 129.1, 129.1, 129.0, 129.0, 128.9, 128.9, 128.4, 128.3, 128.3, 128.2, 128.1, 127.2, 123.6, 123.2, 121.8, 121.2, 120.6, 120.3, 114.2, 113.9, 111.6, 111.0, 78.5, 78.3, 72.5, 72.2, 29.3, 29.1. HRMS calculated for [C<sub>34</sub>H<sub>24</sub>N<sub>2</sub>O<sub>3</sub>+H] 509.1860, Found 509.1867.

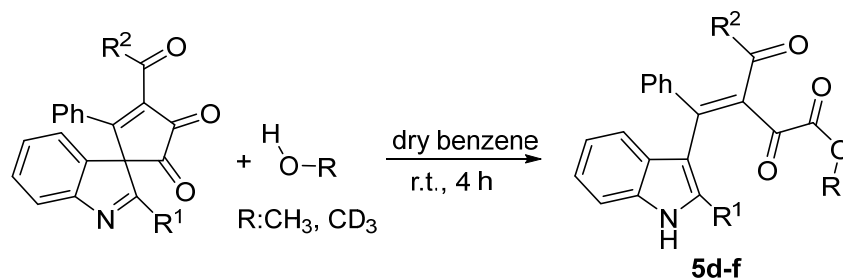

**Scheme S4.** General procedure for synthesis of **5d-f**

In a 50 mL single neck flask, the corresponding spiroindolenine (1 mmol) was dissolved in anhydrous benzene (10 mL). Then methanol or deuterated methanol (1 mmol) was added to the mixture and the resulting solution was stirred at room temperature for 4h. After completion of the reaction, the crude reaction filtered and compounds **5d-f** obtained without any purification.

#### 1-Ethyl 4-methyl-3-oxo-2-(phenyl(2-phenyl-1*H*-indol-3-yl)methylene)succinate (**5d**)

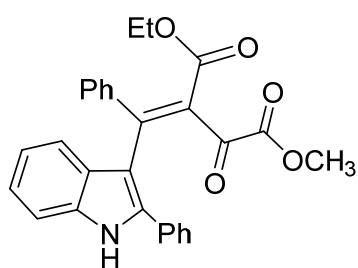

Orange solid (195-198 °C), Yield 91% (195.8 mg); <sup>1</sup>H NMR (400 MHz, d<sub>6</sub>-DMSO) δ 12.19 (bs, 1H, NH), 7.55-7.50 (m, 3H, Ar-H), 7.47-7.44 (m, 4H, Ar-H), 7.42-7.35 (m, 4H, Ar-H), 7.19-7.15 (m, 1H, Ar-H), 6.95-6.91 (m, 1H, Ar-H), 6.67-6.65 (m, 1H, Ar-H), 4.06-3.91 (m, 2H, CH<sub>2</sub>), 2.77 (s, 3H, OCH<sub>3</sub>), 0.98 (t, *J*=7.1 Hz, 3H, CH<sub>3</sub>). <sup>13</sup>C NMR (100 MHz, d<sub>6</sub>-DMSO) δ 183.6, 166.0, 162.5, 155.0, 144.6, 138.3, 136.8, 130.9, 129.9, 129.7, 129.4, 128.7, 128.6, 128.5, 128.4, 127.9, 123.2, 121.0, 119.6, 112.0, 110.6, 60.7, 51.5, 13.5. HRMS calculated for [C<sub>23</sub>H<sub>21</sub>NO<sub>5</sub>+H] 454.1649, Found 454.1652.

#### Methyl 3-benzoyl-2-oxo-4-phenyl-4-(2-phenyl-1*H*-indol-3-yl)but-3-enoate (**5e**)

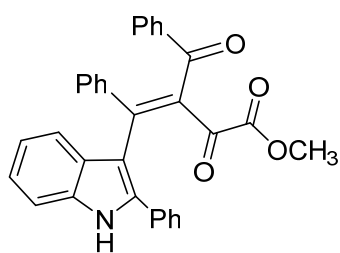

Yellow solid (268-270 °C), Yield 89% (143.5 mg); **<sup>1</sup>H NMR (400 MHz, d<sub>6</sub>-DMSO)** δ 12.20 (s, 1H, NH), 7.84 (d, *J* = 7.3 Hz, 1H, Ar-H), 7.64-7.57 (m, 3H, Ar-H), 7.50-7.29 (m, 12H, Ar-H), 7.22 – 7.18 (m, 1H, Ar-H), 6.99 – 6.95 (m, 1H, Ar-H), 6.75 (d, *J* = 7.6 Hz, 1H, Ar-H), 2.87 (s, 3H, OCH<sub>3</sub>). **<sup>13</sup>C NMR (100 MHz, d<sub>6</sub>-DMSO)** δ 194.2, 185.3, 162.7, 155.1, 144.7, 138.0, 136.9, 136.7, 136.2, 133.3, 130.7, 130.6, 130.0, 129.8, 128.9, 128.8, 128.7, 128.6, 128.5, 128.0, 123.2, 121.0, 119.6, 112.0, 111.6, 51.8. **HRMS** calculated for [C<sub>32</sub>H<sub>23</sub>NO<sub>4</sub>+H]<sup>+</sup> 486.1700, Found 486.1708.

Methyl-d<sub>3</sub> 3-benzoyl-2-oxo-4-phenyl-4-(2-phenyl-1*H*-indol-3-yl)but-3-enoate (**5f**)

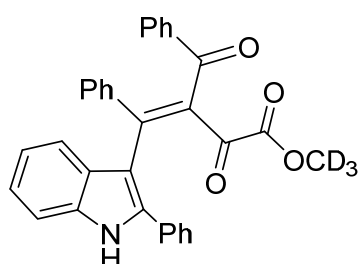

Yellow solid (260-263 °C), Yield 92% (148.9 mg); **<sup>1</sup>H NMR (400 MHz, d<sub>6</sub>-DMSO)** δ 12.20 (s, 0.8H, NH, %20 ND), 7.84 (d, *J* = 6.8 Hz, 1H, Ar-H), 7.64-7.56 (m, 3H, Ar-H), 7.48-7.42 (m, 6H, Ar-H), 7.38 – 7.29 (m, 6H, Ar-H), 7.22 – 7.18 (m, 1H, Ar-H), 6.98 – 6.95 (m, 1H, Ar-H), 6.76 (d, *J* = 8.1 Hz, 1H, Ar-H). **<sup>13</sup>C NMR (100 MHz, d<sub>6</sub>-DMSO)** δ 194.2, 185.3, 162.7, 155.1, 144.6, 137.9, 136.8, 136.2, 133.4, 130.7, 129.9, 129.8, 128.9, 128.7, 128.7, 128.6, 128.6, 128.5, 128.0, 127.3, 123.2, 120.9, 119.7, 111.9, 111.5. **HRMS** calculated for [C<sub>32</sub>H<sub>20</sub>D<sub>3</sub>NO<sub>4</sub>+H]<sup>+</sup> 489.1888, Found 489.1891.

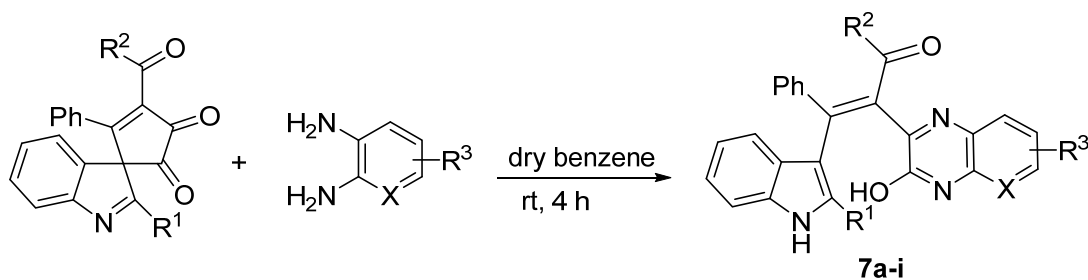

**Scheme S5.** General procedure for synthesis of **7a-k**

In a 50 mL single neck flask, the corresponding spiroindolenine (1 mmol) was dissolved in anhydrous benzene (10 mL). Then 1,2-diamine derivative (1 mmol) was added to the mixture and the resulting solution was stirred at room temperature for 4h. After completion of the reaction, the crude reaction filtered and compounds **7a-k** obtained without any purification.



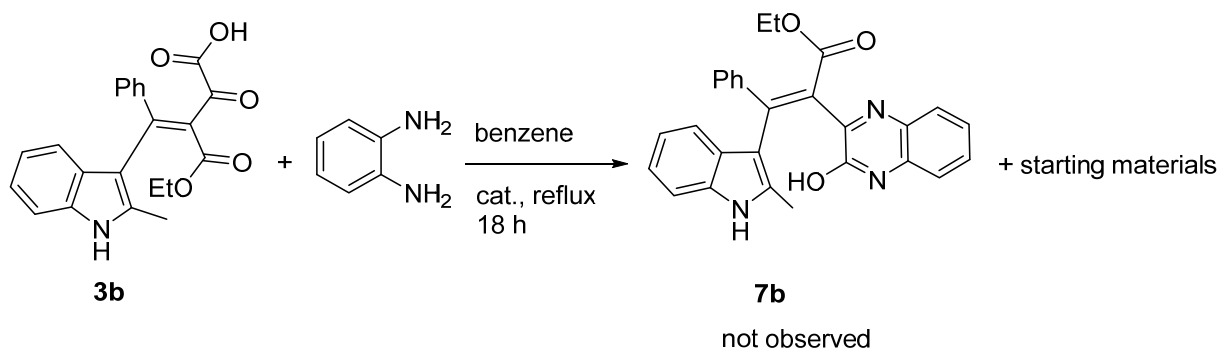

**Scheme S6.** The reaction attempt of indole-3-butyric acid and 1,2-diamino benzene (cat: AcOH or TFA)

In a 50 mL single neck flask, compound 3b (1 mmol) was dissolved in benzene (10 mL). Then 1,2-diaminobenzene (1 mmol) was added to the solution and the resulting solution was stirred at room temperature for 18h. After 18h, TLC analysis was utilized, and the reaction media was analyzed with  $^1\text{H-NMR}$ . Same reaction was also run using catalytic amount of organic acid such as AcOH and TFA, but the result was the same.

Ethyl 2-(3-hydroxyquinoxalin-2-yl)-3-phenyl-3-(2-phenyl-1*H*-indol-3-yl)acrylate (**7a**)

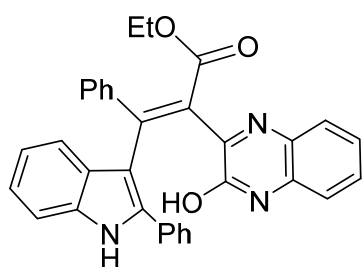

Yellow solid (202-205 °C), Yield 82% (99.2 mg);  $^1\text{H NMR}$  (400 MHz,  $\text{d}_6\text{-DMSO}$ )  $\delta$  12.10 (bs, 1H, OH), 11.48 (s, 1H, NH-indole), 7.50-7.47 (m, 2H, Ar-H), 7.40-7.36 (m, 1H, Ar-H), 7.28-7.16 (m, 10H, Ar-H), 7.11-7.06 (m, 3H, Ar-H), 7.01-6.97 (m, 1H, Ar-H), 6.84-6.80 (m, 1H, Ar-H), 3.94 (q,  $J=7\text{Hz}$ , 2H,  $\text{OCH}_2$ ), 0.90 (t, 3H,  $\text{CH}_3$ ).  $^{13}\text{C NMR}$  (100 MHz,  $\text{d}_6\text{-DMSO}$ )  $\delta$  167.4,

157.6, 153.6, 147.8, 141.2, 138.2, 135.9, 131.7, 131.7, 131.6, 130.0, 129.02, 128.6, 128.4, 128.3, 128.2, 128.0, 127.8, 127.6, 127.6, 122.9, 121.6, 119.5, 118.9, 114.9, 113.0, 111.4, 60.0, 13.6. **HRMS** calculated for  $\text{C}_{33}\text{H}_{25}\text{N}_3\text{O}_3+\text{H}^+$  512.1969, Found 512.1973.

Ethyl 2-(3-hydroxyquinoxalin-2-yl)-3-(2-methyl-1*H*-indol-3-yl)-3-phenylacrylate (**7b**)

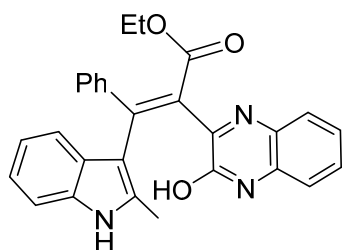

Orange solid (160-162 °C), Yield 85% (212.5 mg);  $^1\text{H NMR}$  (400 MHz,  $\text{CDCl}_3$ )  $\delta$  11.94 (bs, 1H, OH), 8.31 (bs, 0.5H, NH-indole), 8.11 (bs, 0.5H, NH-indole), 7.59 (d,  $J=8.3\text{ Hz}$ , .05H, Ar-H), 7.52 (d,  $J=7.7\text{ Hz}$ , .05H, Ar-H), 7.42-7.30 (m, 3H, Ar-H), 7.25-7.18 (m, 2.5 H, Ar-H), 7.14-7.04 (m, 3.5H, Ar-H), 6.99-6.94 (m, 1.5H, Ar-H), 6.89 (t,  $J=7.3\text{ Hz}$ , 0.5H, Ar-H), 6.78-6.71 (m, 1H, Ar-H), 4.12-3.96 (m, 2H,  $\text{OCH}_2$ ), 2.15

(H), 6.89 (t,  $J=7.3\text{ Hz}$ , 0.5H, Ar-H), 6.78-6.71 (m, 1H, Ar-H), 4.12-3.96 (m, 2H,  $\text{OCH}_2$ ), 2.15

(s, 1.5 H, -CH<sub>3</sub>), 1.99 (s, 1.5 H, -CH<sub>3</sub>), 0.97 (t, *J*=7.1 Hz, 1.5 H, -CH<sub>3</sub>), 0.88 (t, *J*=7.1 Hz, 1.5 H, -CH<sub>3</sub>). **<sup>13</sup>C NMR (100 MHz, d<sub>6</sub>-DMSO)** δ 167.6, 167.0, 159.2, 158.4, 154.5, 154.1, 149.6, 148.7, 141.8, 141.4, 136.9, 136.4, 135.5, 135.4, 131.8, 131.8, 131.7, 131.6, 130.1, 130.0, 129.7, 129.1, 128.6, 128.4, 128.4, 128.3, 128.0, 127.9, 127.8, 127.6, 126.9, 126.3, 123.2, 123.1, 120.7, 120.5, 119.2, 119.0, 118.7, 118.6, 115.2, 115.0, 113.1, 112.8, 110.8, 110.6, 59.9, 59.8, 13.7, 13.5, 12.5, 12.4. **HRMS** calculated for [C<sub>28</sub>H<sub>23</sub>N<sub>3</sub>O<sub>3</sub>+H]<sup>+</sup> 450.1812, Found 450.1816.

2-(3-hydroxyquinoxalin-2-yl)-1,3-diphenyl-3-(2-phenyl-1*H*-indol-3-yl)prop-2-en-1-one (**7c**)

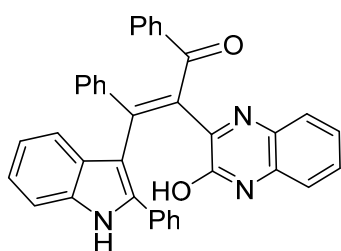

Orange solid (280-283 °C), Yield 80% (144 mg); **<sup>1</sup>H NMR (400 MHz, d<sub>6</sub>-DMSO)** δ 12.34 (bs, 0.5H, OH-indole), 12.09 (bs, 0.5H, OH-quinoxaline), 11.54 (bs, 0.5H, NH-indole), 11.35 (bs, 0.5H, NH-quinoxaline), 7.86-7.84 (m, 1H, Ar-H), 7.73-7.71 (m, 1H, Ar-H), 7.54-7.45 (m, 2H, Ar-H), 7.39-6.95 (m, 16.5H, Ar-H), 6.90-

6.85 (m, 1.5H, Ar-H), 6.82-6.75 (m, 1H, Ar-H). **<sup>13</sup>C NMR (100 MHz, d<sub>6</sub>-DMSO)** δ 196.3, 195.2, 160.5, 159.4, 154.3, 153.5, 148.1, 146.9, 140.7, 140.0, 138.6, 138.4, 138.2, 136.2, 136.1, 135.5, 135.1, 132.2, 131.9, 131.8, 131.7, 131.6, 131.1, 130.3, 130.2, 130.1, 129.7, 129.0, 128.8, 128.6, 128.6, 128.5, 128.4, 128.3, 128.1, 128.0, 127.9, 127.8, 127.7, 127.6, 127.2, 126.7, 123.3, 122.9, 122.0, 121.7, 119.7, 119.7, 119.6, 119.0, 115.3, 114.9, 113.5, 113.2, 111.5, 111.1. **HRMS** calculated for [C<sub>37</sub>H<sub>25</sub>N<sub>3</sub>O<sub>2</sub>+H] 544.2020, Found 544.2000.

Ethyl 2-(6-bromo-3-hydroxy-8-methylquinoxalin-2-yl)-3-phenyl-3-(2-phenyl-1*H*-indol-3-yl)acrylate (**7d**)

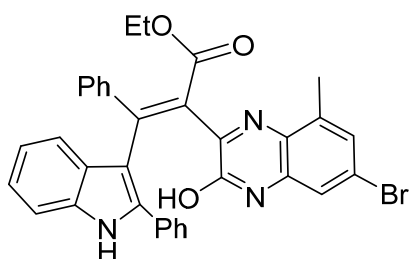

Orange solid (213-216 °C), tautomer ratio: OH (1:1), NH (1:1), Yield 72% (154.8 mg); **<sup>1</sup>H NMR (400 MHz, d<sub>6</sub>-DMSO)** δ 11.89 (bs, 0.5H, OH-indole), 11.76 (bs, 0.5H, OH-quinoxaline), 11.63 (bs, 0.5H, NH-indole), 11.53 (bs, 0.5H, NH-quinoxaline), 7.80-7.78 (m, 1H, Ar-H), 7.54 (bs, 1H- Ar-

H), 7.44-7.42 (m, 2H, Ar-H), 7.36-7.30 (m, 1H, Ar-H), 7.30-7.17 (m, 5H, Ar-H), 7.13-7.05 (m, 3.5H, Ar-H), 7.02-6.98 (m, 1.5H, Ar-H), 6.93-6.89 (m, 0.5H, Ar-H), 6.84-6.80 (m, 0.5H, Ar-H), 3.94 (qd, *J*=1.1, 7.0 Hz, 1H, OCH<sub>2</sub>), 3.66-3.47 (m, 1H, OCH<sub>2</sub>), 2.39 (s, 1.5H, CH<sub>3</sub>-quinoxaline), 2.29 (s, 1.5H, CH<sub>3</sub>-quinoxaline), 0.91 (t, *J*= 7.1 Hz, 1.5H, CH<sub>3</sub>), 0.61 (t, *J*= 7.1 Hz, 1.5H, CH<sub>3</sub>). **<sup>13</sup>C NMR (100 MHz, d<sub>6</sub>-DMSO)** δ 167.3, 166.3, 159.8, 158.5, 154.6, 153.8, 149.5, 148.4, 141.0, 140.8, 138.4, 137.7, 136.3, 136.1, 133.5, 133.2, 132.8, 132.6, 131.6, 131.5, 129.7, 129.6, 129.1, 128.6, 128.6, 128.4, 128.3, 128.3, 128.1, 128.0, 127.9, 127.9, 127.8, 127.7, 126.7, 126.3, 121.9, 121.7, 119.7, 119.7, 119.1, 119.1, 114.4, 113.8, 113.0, 112.8, 111.6, 111.5,

60.1, 59.7, 16.5, 16.4, 13.6, 13.4. **HRMS** calculated for  $[C_{34}H_{26}BrN_3O_3+H]^+$  = 604.1231, Found 604.1234

Ethyl 2-(6-bromo-3-hydroxy-8-methylquinoxalin-2-yl)-3-(2-methyl-1*H*-indol-3-yl)-3-phenylacrylate (**7e**)

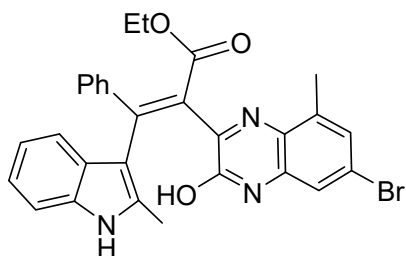

Mustard coloured solid (254-258 °C), Yield 77% (174 mg); **<sup>1</sup>H NMR (400 MHz, d<sub>6</sub>-DMSO)** δ 11.91 (bs, 0.45H, OH-indole), 11.82 (bs, 0.55H, OH-quinoxaline), 11.45 (bs, 0.55H, NH-indole), 11.18 (bs, 0.45H, NH-quinoxaline), 7.51-7.35 (m, 3.55H, Ar-H), 7.30 (d, *J*=8.0Hz, 0.55H, Ar-H), 7.23-7.14 (m, 3H, Ar-H), 7.04-6.98 (m, 1.55H, Ar-H), 6.90-6.87 (m, 0.55H, Ar-H), 6.82 (t, *J*=7.4 Hz, 0.55H, Ar-H), 6.74-6.68 (m, 1.45H, Ar-H), 3.95-3.88 (m, 2H, OCH<sub>2</sub>), 2.40 (s, 1.65H, CH<sub>3</sub>-quinoxaline), 2.33 (s, 1.35H, CH<sub>3</sub>-quinoxaline), 2.15 (s, 1.65H, CH<sub>3</sub>-indole), 1.90 (s, 1.35H, CH<sub>3</sub>-indole), 0.90-0.85 (m, 3H, CH<sub>3</sub>). **<sup>13</sup>C NMR (100 MHz, d<sub>6</sub>-DMSO)** δ 167.5, 166.8, 160.1, 159.3, 154.9, 154.3, 150.2, 149.4, 141.6, 141.3, 137.2, 136.6, 135.5, 133.3, 133.3, 132.8, 132.7, 129.7, 129.7, 129.6, 129.1, 128.8, 128.5, 128.1, 128.1, 128.0, 127.8, 127.5, 126.7, 126.5, 126.4,

125.6, 120.7, 120.6, 119.3, 119.2, 118.7, 118.6, 114.3, 114.1, 113.1, 112.9, 110.8, 110.7, 60.0, 59.9, 16.5, 16.4, 13.7, 13.6, 12.6. **HRMS** calculated for  $[C_{29}H_{24}BrN_3O_3+H]^+$  542.1074, Found 542.1078.

2-(6-bromo-3-hydroxy-8-methylquinoxalin-2-yl)-1,3-diphenyl-3-(2-phenyl-1*H*-indol-3-yl)prop-2-en-1-one (**7f**)

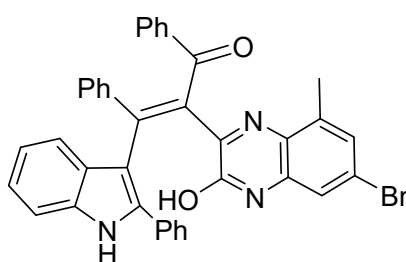

Yellow solid (235-238 °C), Yield 75% (105.4 mg); **<sup>1</sup>H NMR (400 MHz, d<sub>6</sub>-DMSO)** δ 11.59 (bs, 1H, OH), 11.58 (bs, 1H, NH), 7.84-7.83 (m, 2H, Ar-H), 7.47-7.45 (m, 2H, Ar-H), 7.42 (bs, 1H, Ar-H), 7.40-7.36 (m, 1H, Ar-H), 7.34-7.29 (m, 3H, Ar-H), 7.17-7.15 (m, 3H, Ar-H), 7.12-7.02 (m, 8H, Ar-H), 6.85 (t, *J*=7.5Hz, 1H, Ar-H), 2.28 (s, 3H, CH<sub>3</sub>). **<sup>13</sup>C NMR (100 MHz, d<sub>6</sub>-DMSO)** δ 195.9, 160.0, 153.5, 147.4, 140.6, 138.8, 138.2, 136.2, 134.4, 133.1, 133.0, 132.7, 132.0, 131.6, 129.9, 129.5, 128.9, 128.7, 128.4, 128.4, 128.1, 128.0, 127.9, 127.7, 126.3, 121.8, 119.8, 119.2, 113.7, 113.3, 111.6, 16.4. **HRMS** calculated for  $[C_{38}H_{26}BrN_3O_2+H]^+$  636.1281, Found 636.1293.

Ethyl 2-(3-hydroxypyrido[2,3-b]pyrazin-2-yl)-3-phenyl-3-(2-phenyl-1*H*-indol-3-yl)acrylate

(7g)

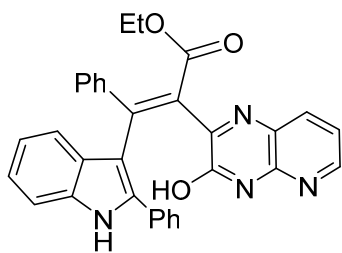

Orange solid (198-200 °C), Yield 70% (150.6 mg); <sup>1</sup>H NMR (400 MHz, CDCl<sub>3</sub>) δ 8.57 (bs, 0.33H, NH-indole), 8.49 (dd, *J*=1.7 and 4.8 Hz, 0.33H, Py-H), 8.40 (bs, 0.66H, NH-indole), 8.38 (dd, *J*=1.7 and 4.8 Hz, 0.66H, Py-H), 7.95 (dd, *J*=1.7 and 8.0 Hz, 0.33H, Py-H), 7.72-7.70 (m, 0.66H, Ar-H), 7.61 (dd, *J*=1.7 and 8.0 Hz,

0.66H, Py-H), 7.47-7.44 (m, 1.33H, Ar-H), 7.39-7.37 (m, 0.33H, Ar-H), 7.35-7.26 (m, 4H, Ar-H), 7.21-7.16 (m, 2.31H, Ar-H), 7.12-6.97 (m, 5.61H, Ar-H), 6.89-6.85 (m, 0.66H, Ar-H), 4.07-4.00 (m, 1.33H, OCH<sub>2</sub>), 3.86-3.68 (m, 0.66H, OCH<sub>2</sub>), 0.96 (t, *J*=7.1Hz, 2H, CH<sub>3</sub>), 0.71 (t, *J*=7.1Hz, 1H, CH<sub>3</sub>). <sup>13</sup>C NMR (100 MHz, CDCl<sub>3</sub>) δ 168.5, 167.4, 160.4, 158.8, 155.5, 151.1, 149.4, 143.6, 143.3, 141.3, 141.0, 138.1, 137.5, 137.2, 136.2, 136.0, 131.9, 131.8, 130.4, 129.6, 129.4, 129.1, 129.1, 129.0, 128.7, 128.7, 128.6, 128.3, 128.3, 128.2, 128.1, 127.9, 127.8, 122.8, 122.7, 120.9, 120.8, 120.4, 119.9, 119.5, 119.4, 114.9, 113.9, 111.0, 61.00, 60.8, 13.8, 13.7. HRMS calculated for [C<sub>32</sub>H<sub>24</sub>N<sub>4</sub>O<sub>3</sub>+H]<sup>+</sup> 513.1921, Found 513.1928.

Ethyl 2-(3-hydroxypyrido[2,3-b]pyrazin-2-yl)-3-(2-methyl-1*H*-indol-3-yl)-3-phenylacrylate

(7h)

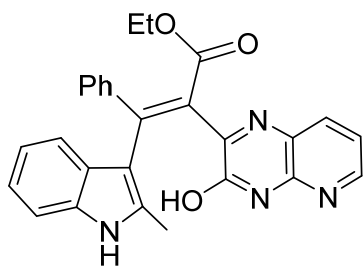

Yellow solid (294-295 °C), Yield 74% (114.4 mg); <sup>1</sup>H NMR (400 MHz, d<sub>6</sub>-DMSO) δ 12.93 (bs, 0.45H, OH-indole), 12.82 (bs, 0.55H, OH-quinoxaline), 11.47 (bs, 0.55H, NH-indole), 11.21 (bs, 0.45H, NH-quinoxaline), 8.46 (dd, *J*=1.7 and 4.7 Hz, 0.55H, Py-H), 8.41 (dd, *J*=1.7 and 4.7 Hz, 0.45H, Py-H), 7.91 (dd, *J*=1.7 and 8.0 Hz, 0.55H, Py-H), 7.87 (dd, *J*=1.7 and 8.0

Hz, 0.45H, Py-H), 7.42-7.35 (m, 1.35H, Ar-H), 7.31-7.25 (m, 1H, Ar-H), 7.24-7.21 (m, 1.35H, Ar-H), 7.19-7.13 (m, 1.90H, Ar-H), 7.04-6.98 (m, 1.65H, Ar-H), 6.89-6.80 (m, 1H, Ar-H), 6.74-6.67 (m, 1.55H, Ar-H), 3.95-3.87 (m, 2H, OCH<sub>2</sub>), 2.16 (s, 1.65H, CH<sub>3</sub>-indole), 1.88 (s, 1.35H, CH<sub>3</sub>-indole), 0.86 (t, *J*=7.1Hz, 1.35H, CH<sub>3</sub>), 0.85 (t, *J*=7.1Hz, 1.65H, CH<sub>3</sub>). <sup>13</sup>C NMR (100 MHz, d<sub>6</sub>-DMSO) δ 167.5, 166.7, 160.4, 159.6, 155.9, 155.3, 150.5, 150.1, 150.0, 149.6, 143.5, 143.3, 141.6, 141.2, 137.3, 136.9, 136.3, 136.2, 135.5, 135.4, 129.8, 129.1, 128.8, 128.6, 128.1, 128.1, 127.8, 127.4, 126.9, 126.8, 126.2, 125.4, 120.8, 120.7, 119.9, 119.8, 119.3, 119.2, 118.7, 118.6, 113.0, 112.8, 110.8, 110.8, 60.1, 60.0, 13.7, 13.5, 12.6. HRMS calculated for [C<sub>27</sub>H<sub>22</sub>N<sub>4</sub>O<sub>3</sub>+H]<sup>+</sup> 451.1765, Found 451.1769.

2-(3-hydroxypyrido[2,3-b]pyrazin-2-yl)-1,3-diphenyl-3-(2-phenyl-1*H*-indol-3-yl)prop-2-en-1-one (7i)

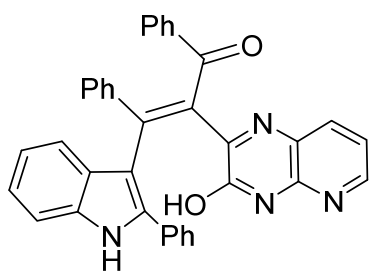

Orange solid (233-236 °C), Yield 72% (77.9 mg); **<sup>1</sup>H NMR (400 MHz, d<sub>6</sub>-DMSO)** δ 12.54 (bs, 1H, OH), 11.60 (bs, 1H, NH), 8.36 (dd, *J*=1.7 and 4.7 Hz, 1H, Py-H), 7.85-7.82 (m, 2H, Ar-H), 7.54 (dd, *J*=1.6 and 8.0 Hz, 1H, Py-H), 7.44-7.42 (m, 2H, Ar-H), 7.41-7.35 (m, 2H, Ar-H), 7.34-7.30 (m, 3H, Ar-H), 7.16-7.13 (m, 5H, Ar-H), 7.09-7.00 (m, 5H, Ar-H), 6.86-6.82 (m, 1H, Ar-H). **<sup>13</sup>C NMR (100 MHz, d<sub>6</sub>-DMSO)** δ 196.6, 195.4, 164.2, 163.0, 154.1, 153.2, 149.3, 147.8, 145.5, 145.1, 143.0, 142.8, 140.8, 140.7, 140.5, 139.2, 138.4, 138.3, 136.4, 136.3, 135.1, 134.5, 132.2, 131.7, 131.2, 130.7, 130.3, 130.0, 129.3, 129.1, 128.7, 128.6, 128.6, 128.5, 128.2, 127.9, 127.8, 127.6, 127.5, 127.0, 125.4, 125.1, 124.5, 124.0, 122.3, 122.0, 120.1, 120.0, 119.9, 119.2, 113.4, 111.9, 111.4, 109.8. **HRMS** calculated for [C<sub>36</sub>H<sub>24</sub>N<sub>4</sub>O<sub>2</sub>+Na]<sup>+</sup> 567.1792, Found 567.1794.

Ethyl 2-(3-hydroxyquinoxalin-2-yl)-3-(2-phenyl-1*H*-indol-3-yl)-3-(thiophen-2-yl)acrylate (7j)

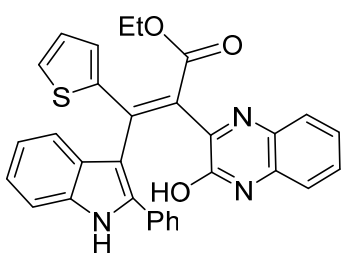

Yellow solid (207-209 °C), Yield 94%; **<sup>1</sup>H NMR (400 MHz, d<sub>6</sub>-DMSO)** δ 12.44 (s, 1H, -NH), 11.78 (s, 1H, -OH), 7.80-7.78 (m, 2H, Ar-H), 7.75 (d, *J*=8.0 Hz, 1H, Ar-H), 7.57-7.53 (m, 1H, Ar-H), 7.46 (d, *J*=8.1 Hz, 1H, Ar-H), 7.41 (dd, *J*=1.1, 4.9 Hz, 1H, Ar-H), 7.36-7.28 (m, 5H, Ar-H), 7.25-7.21 (m, 1H, Ar-H), 7.16-7.12 (m, 1H, Ar-H), 7.01-6.97 (m, 1H, Ar-H), 6.76-6.71 (m, 2H, Ar-H), 3.65-3.55 (m, 2H, -OCH<sub>2</sub>), 0.55 (t, *J*=7.1 Hz, 3H, -CH<sub>3</sub>). **<sup>13</sup>C NMR (100 MHz, d<sub>6</sub>-DMSO)** δ 166.8, 158.9, 154.4, 143.8, 141.0, 137.4, 136.4, 132.6, 132.5, 132.1, 131.3, 131.0, 130.4, 129.3, 129.2, 128.8, 128.8, 128.0, 127.5, 126.9, 123.8, 122.4, 120.1, 119.4, 115.8, 113.3, 111.9, 60.1, 13.7. **HRMS** Calculated for [C<sub>31</sub>H<sub>24</sub>N<sub>3</sub>O<sub>3</sub>S+H]<sup>+</sup> 518.1538, Found 518.1522.

Ethyl 2-(3-hydroxyquinoxalin-2-yl)-3-(naphthalen-2-yl)-3-(2-phenyl-1*H*-indol-3-yl)acrylate (7k)

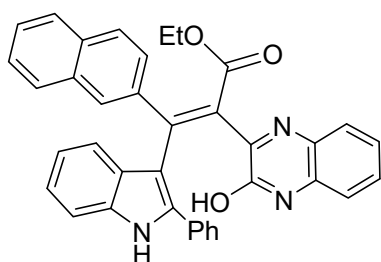

Mustard yellow solid (230-232 °C), Yield 96%; **<sup>1</sup>H NMR (400 MHz, d<sub>6</sub>-DMSO)** δ 12.38 (bs, 0.4H, OH-indole), 12.17 (bs, 0.6H, OH-quinoxaline), 11.81 (bs, 0.4H, NH-indole), 11.57 (bs, 0.6H, NH-quinoxaline), 7.84-7.81 (m, 1.8H, Ar-H), 7.75-7.69 (m, 1.6H, Ar-H), 7.65-7.57 (m, 1.4H, Ar-H), 7.52-7.45 (m, 3.2H, Ar-H), 7.43-7.36 (m, 1.5H, Ar-H), 7.34-7.28 (m, 2.2H, Ar-H), 7.24-7.05 (m, 6.2H, Ar-

H), 7.01-6.97 (m, 0.8H, Ar-H), 6.92-6.88 (m, 0.6H, Ar-H), 6.82-6.78 (m, 0.7H, Ar-H), 3.95-3.89 (m, 1H, -OCH<sub>2</sub>), 3.68-3.53 (m, 1H, -OCH<sub>2</sub>), 0.80 (t,  $J=7.1$  Hz, 1.8H, -CH<sub>3</sub>), 0.61 (t,  $J=7.1$  Hz, 1.2H, -CH<sub>3</sub>). **<sup>13</sup>C NMR (100 MHz, d<sub>6</sub>-DMSO)**  $\delta$  167.8, 167.0, 159.2, 158.1, 154.6, 154.1, 149.1, 148.3, 139.2, 139.0, 138.8, 138.0, 136.7, 136.4, 133.2, 133.0, 132.8, 132.7, 132.3, 132.2, 132.2, 132.1, 132.0, 131.9, 130.7, 130.5, 129.9, 129.5, 129.2, 129.0, 128.7, 128.7, 128.6, 128.5, 128.5, 128.4, 128.3, 128.1, 127.9, 127.8, 127.7, 127.6, 127.5, 127.4, 127.0, 126.9, 126.6, 123.7, 123.4, 122.3, 122.1, 120.1, 120.0, 119.5, 119.3, 115.7, 115.4, 113.7, 113.4, 112.0, 111.9, 60.4, 60.1, 14.0, 13.8. **HRMS** Calculated for [C<sub>37</sub>H<sub>28</sub>N<sub>3</sub>O<sub>3</sub>+H]<sup>+</sup> 562.2131, Found 562.2111.

## Copies of $^1\text{H}$ NMR and $^{13}\text{C}$ NMR spectra

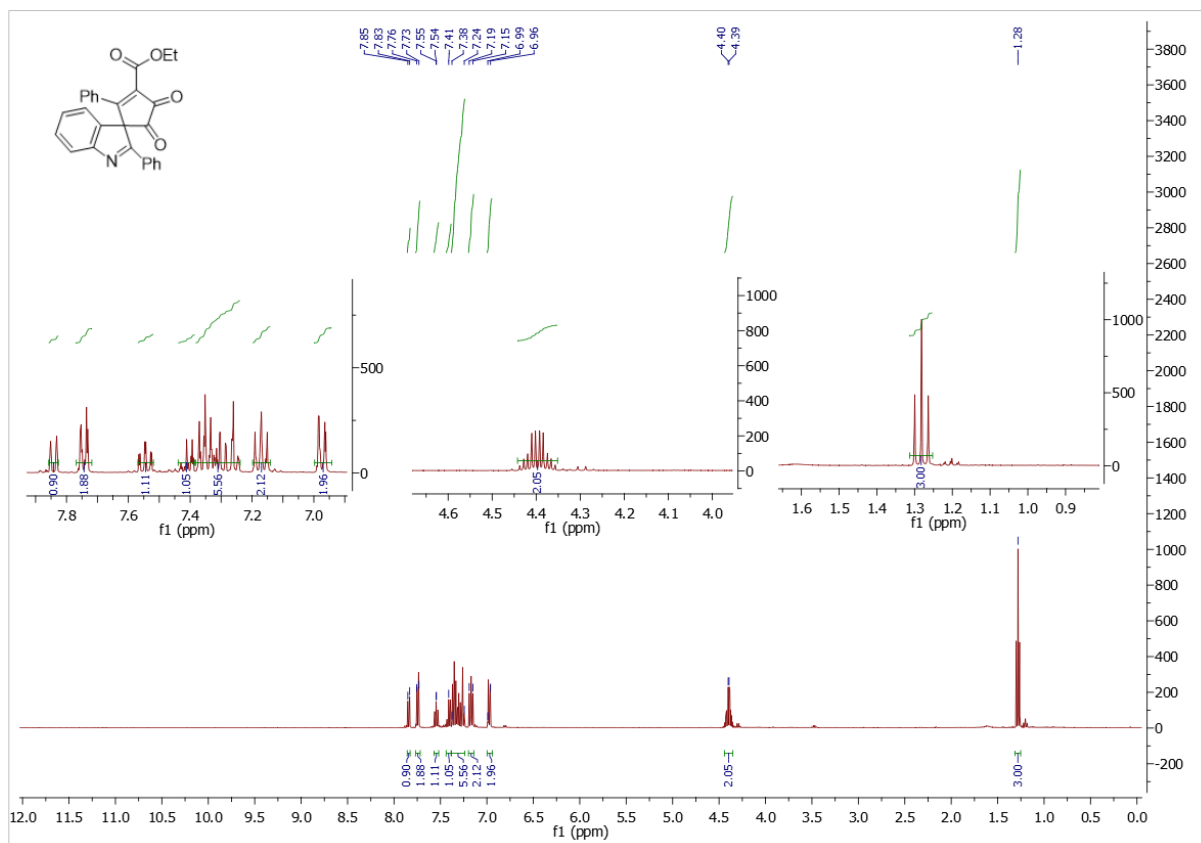

$^1\text{H}$ -NMR spectrum of compound **4a**

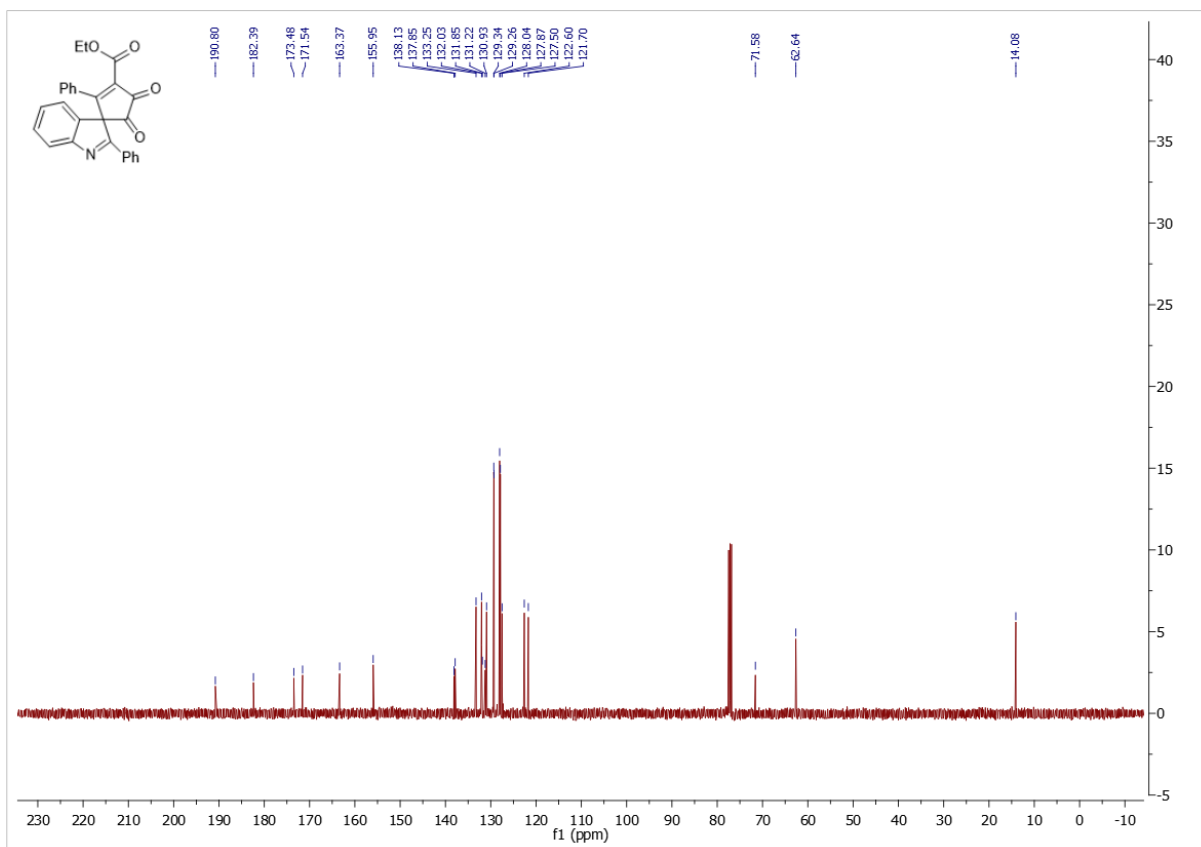

$^{13}\text{C}$ -NMR spectrum of compound **4a**

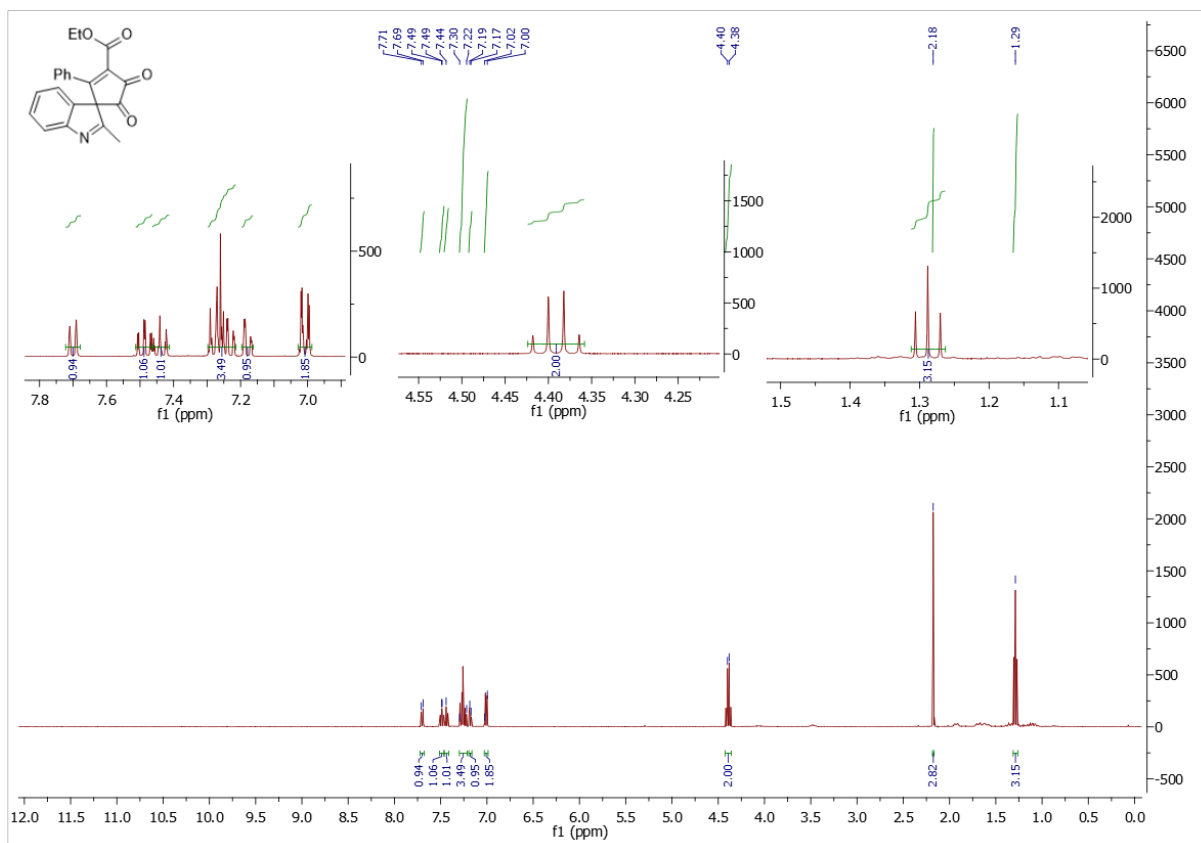

**<sup>1</sup>H-NMR spectrum of compound 4b**

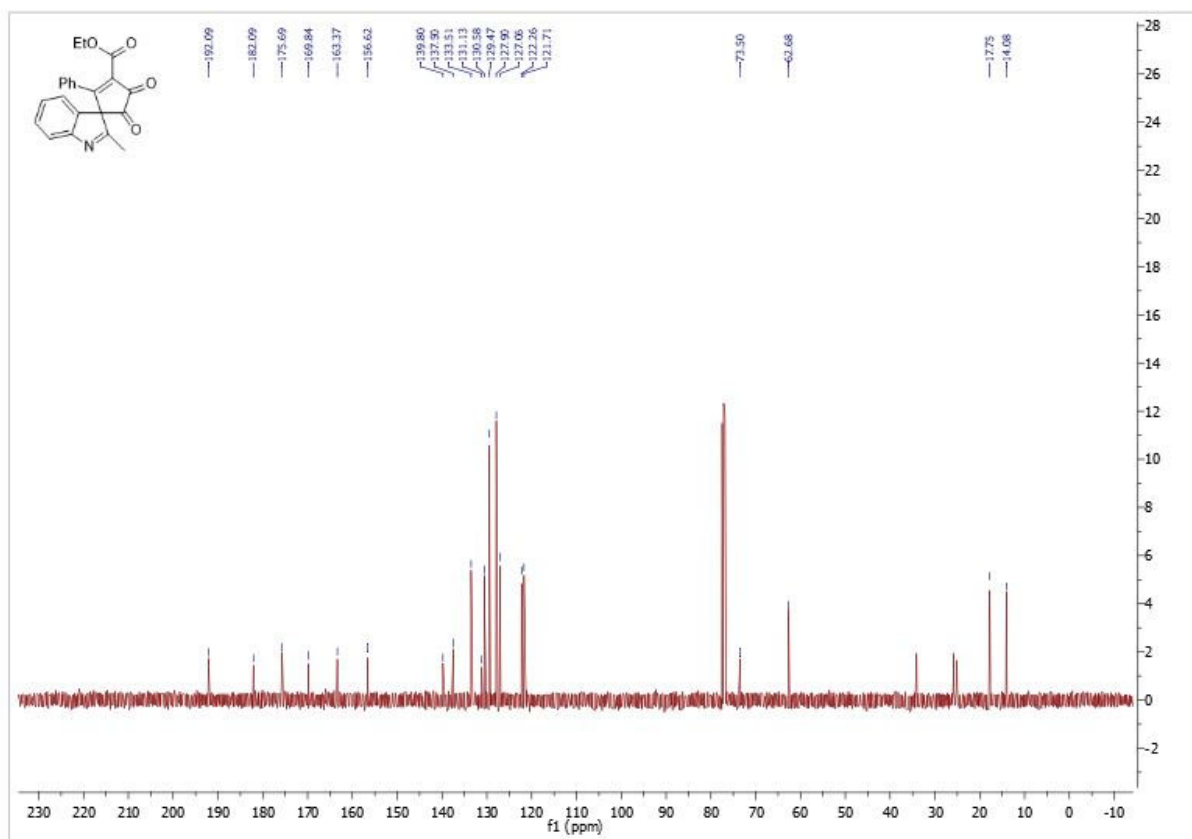

**<sup>13</sup>C-NMR spectrum of compound 4b**



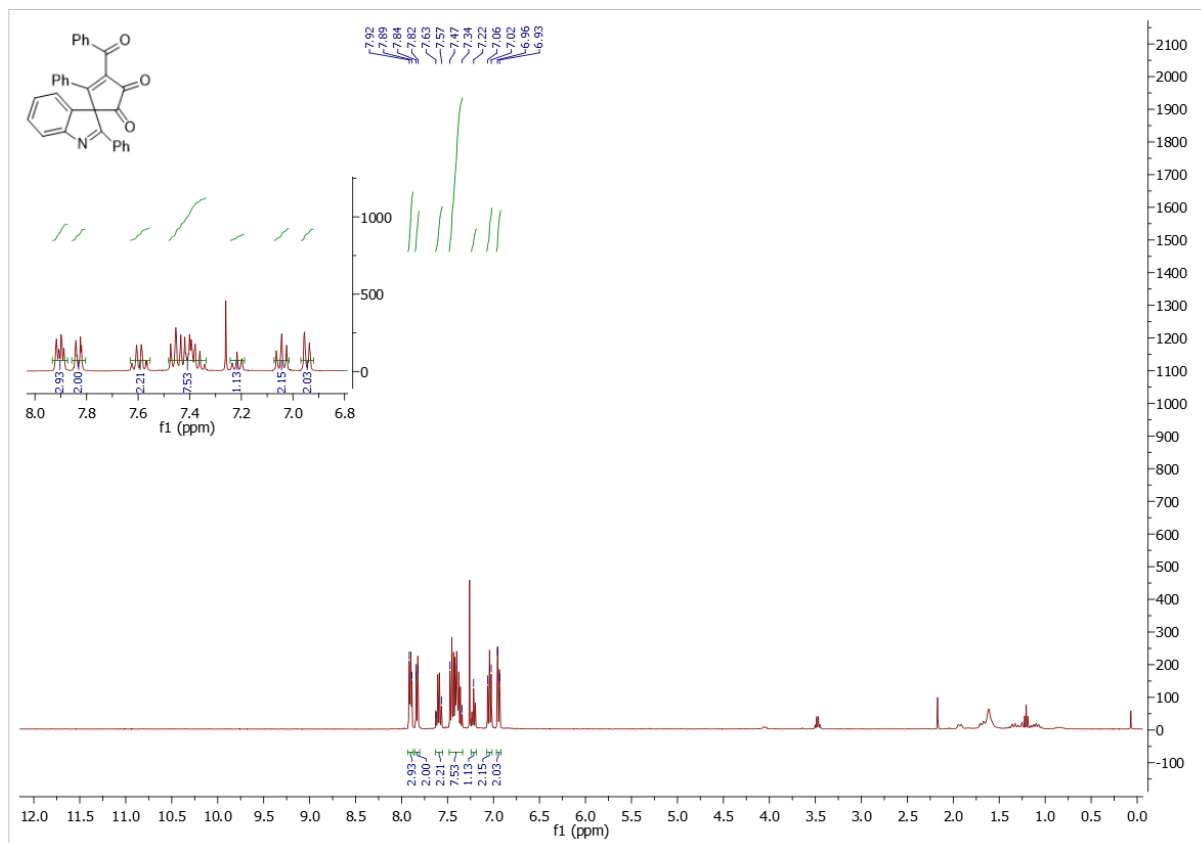

<sup>1</sup>H-NMR spectrum of compound 4c

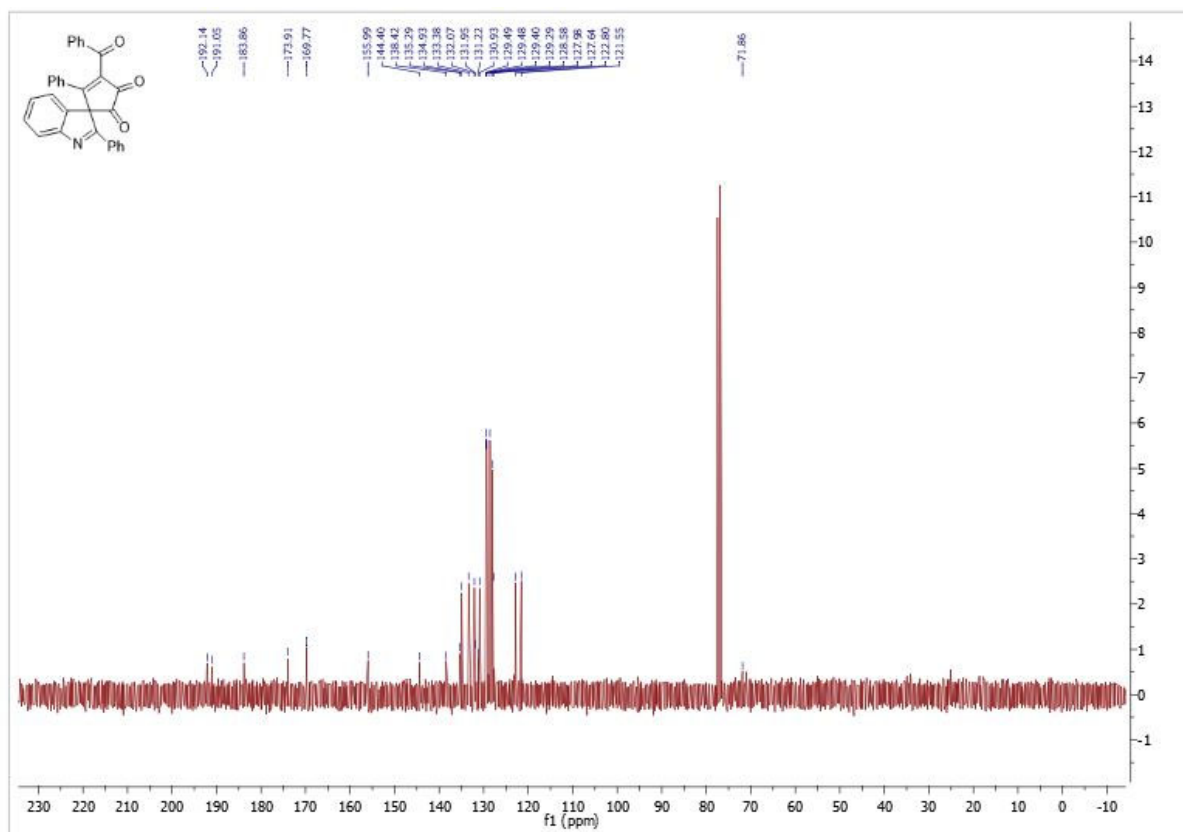

<sup>13</sup>C-NMR spectrum of compound 4c

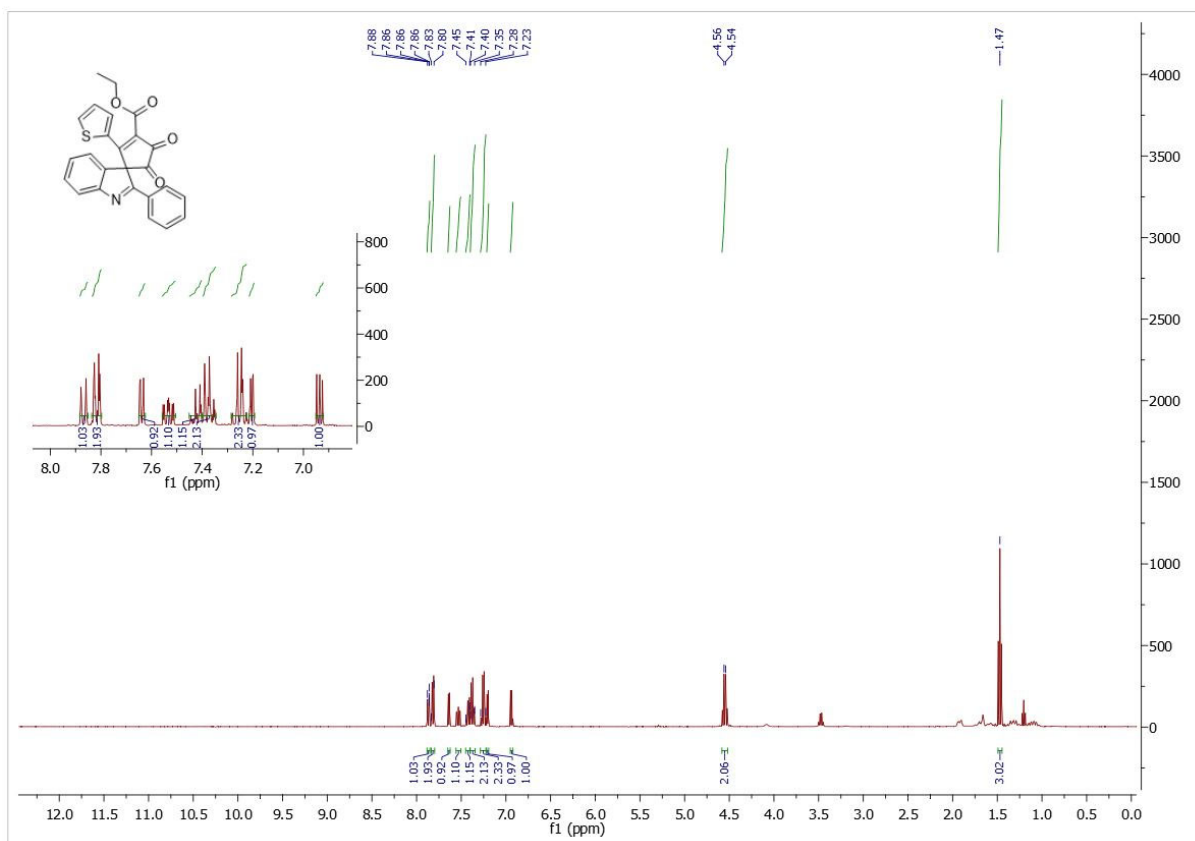

**<sup>1</sup>H-NMR spectrum of compound 4d**

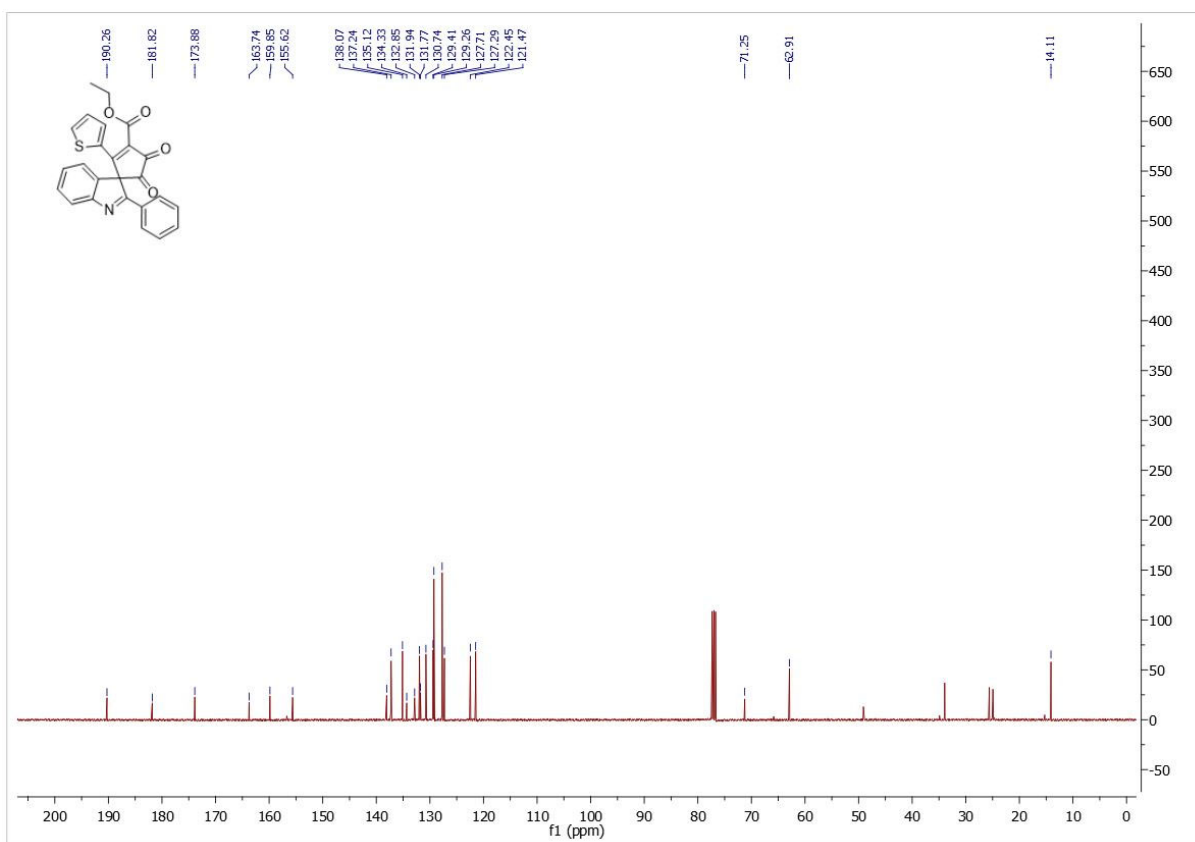

**<sup>13</sup>C-NMR spectrum of compound 4d**

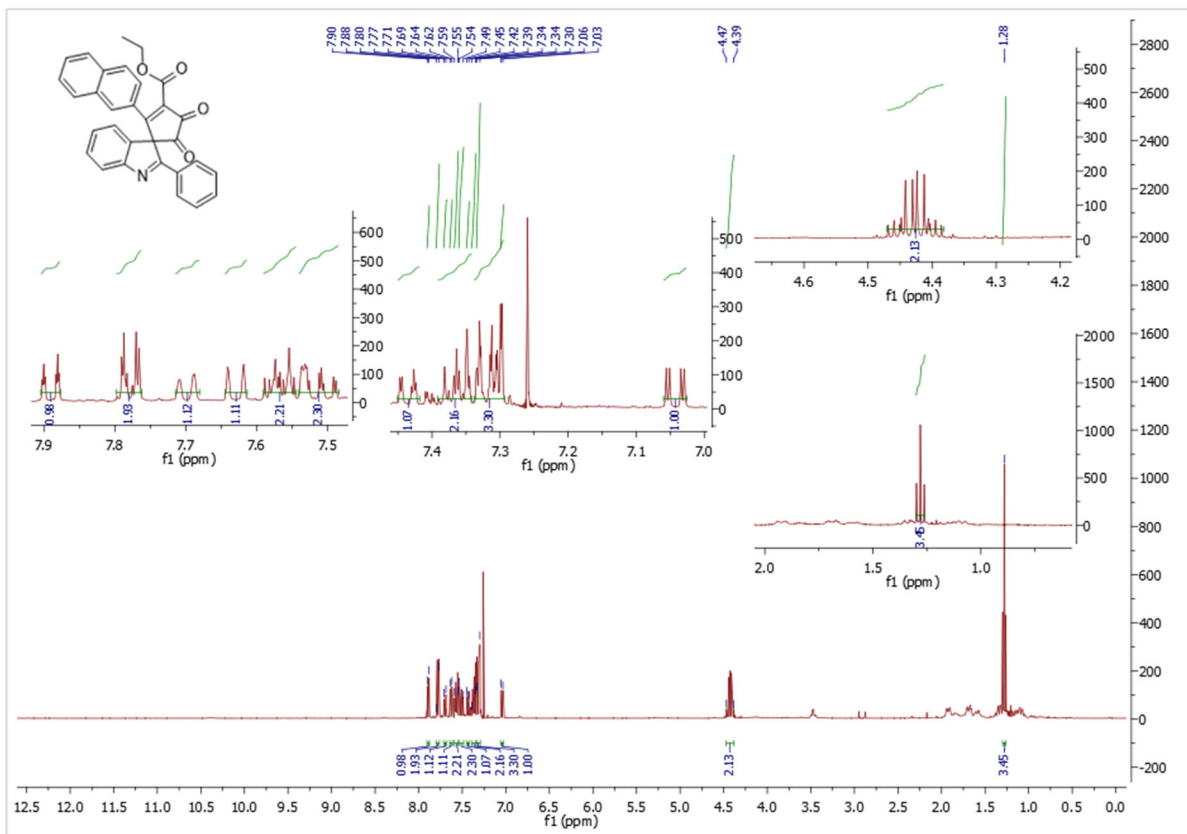

$^1\text{H-NMR}$  spectrum of compound 4e

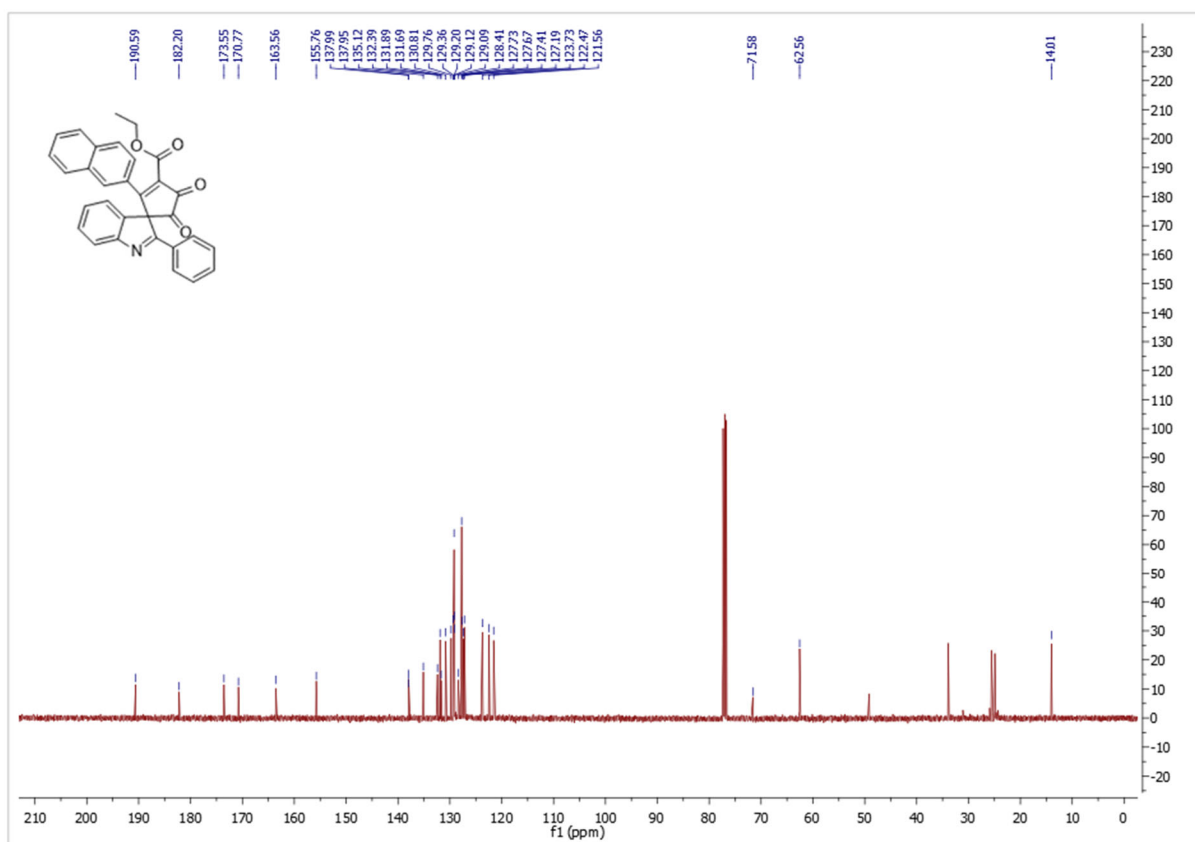

$^{13}\text{C-NMR}$  spectrum of compound 4e

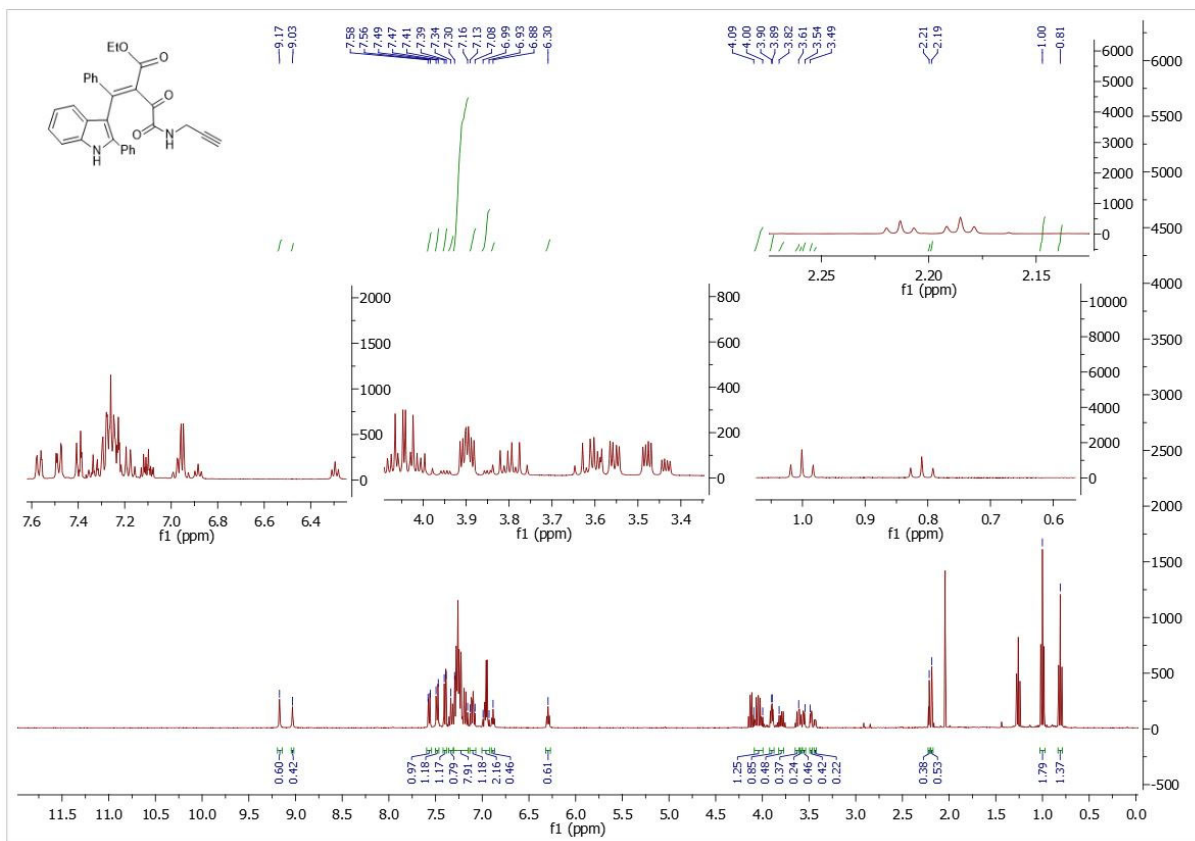

<sup>1</sup>H-NMR spectrum of compound 5a

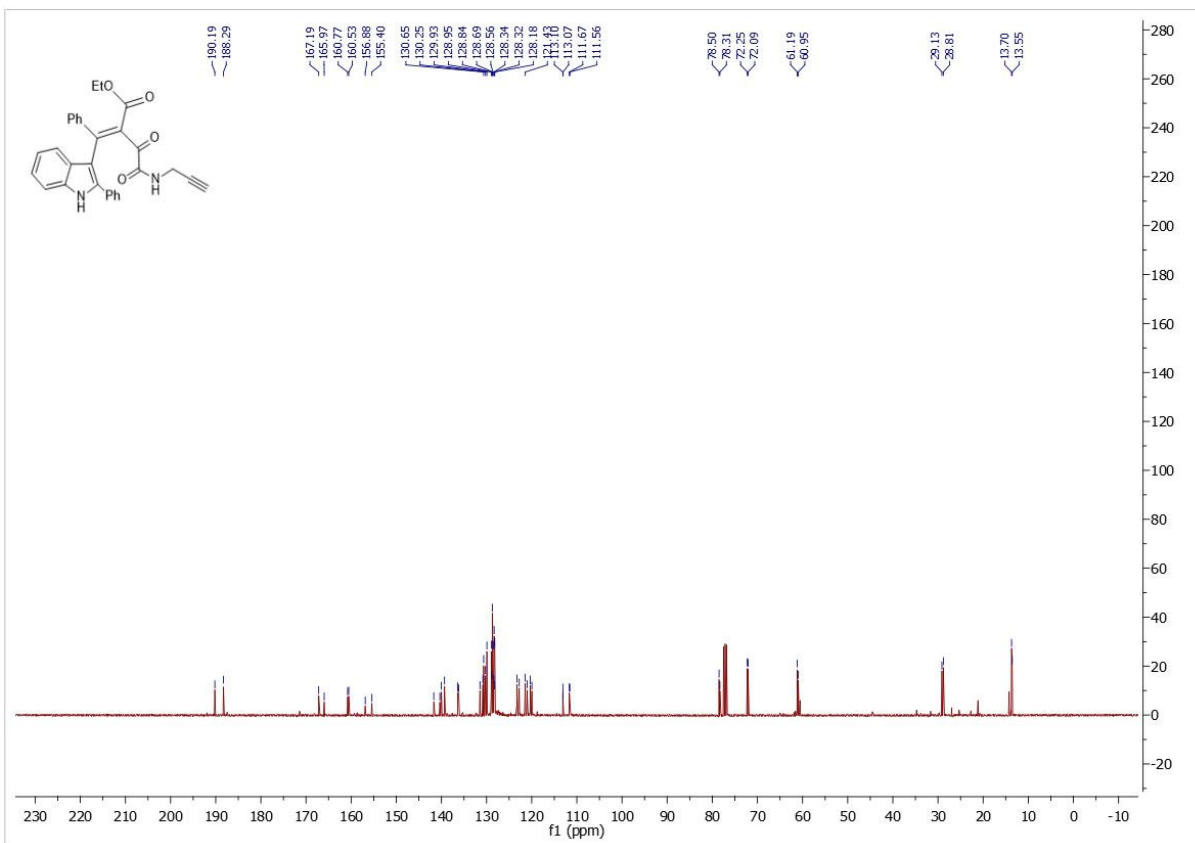

<sup>13</sup>C-NMR spectrum of compound 5a

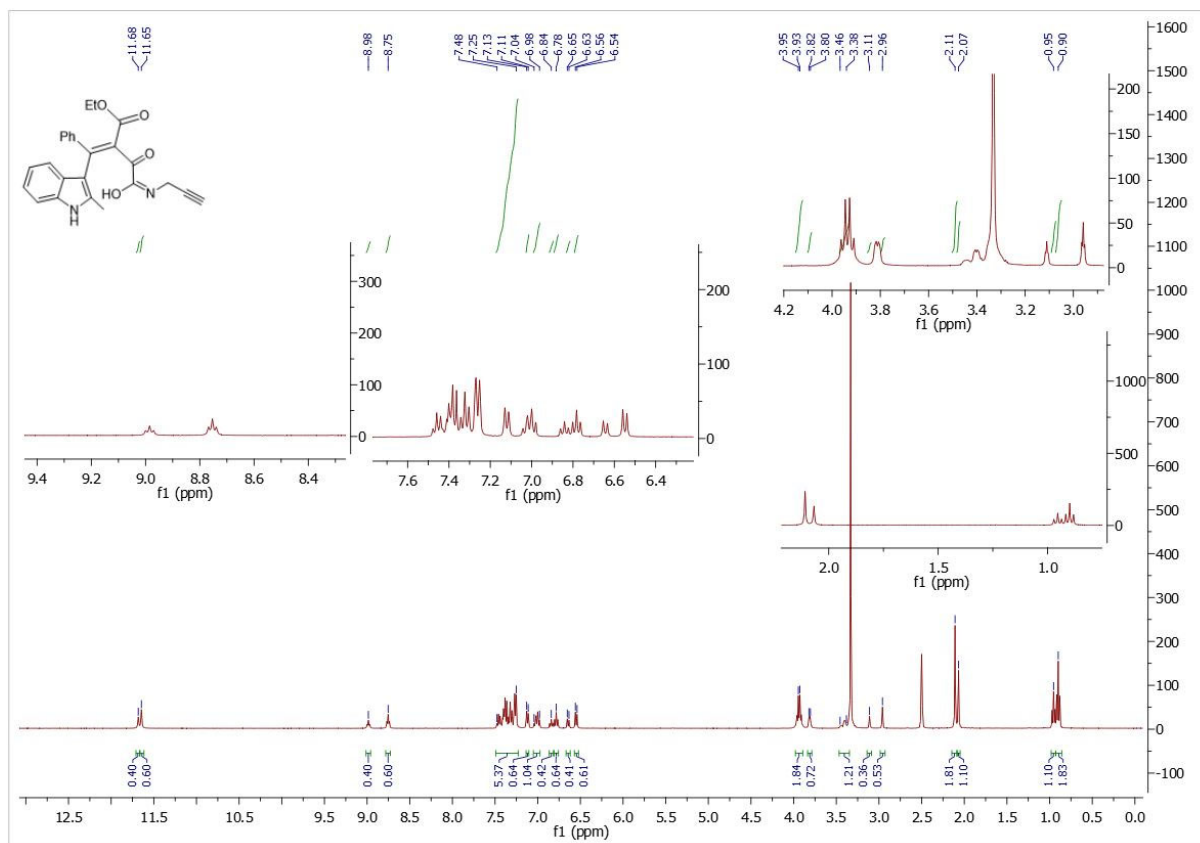

**<sup>1</sup>H-NMR spectrum of compound 5b**

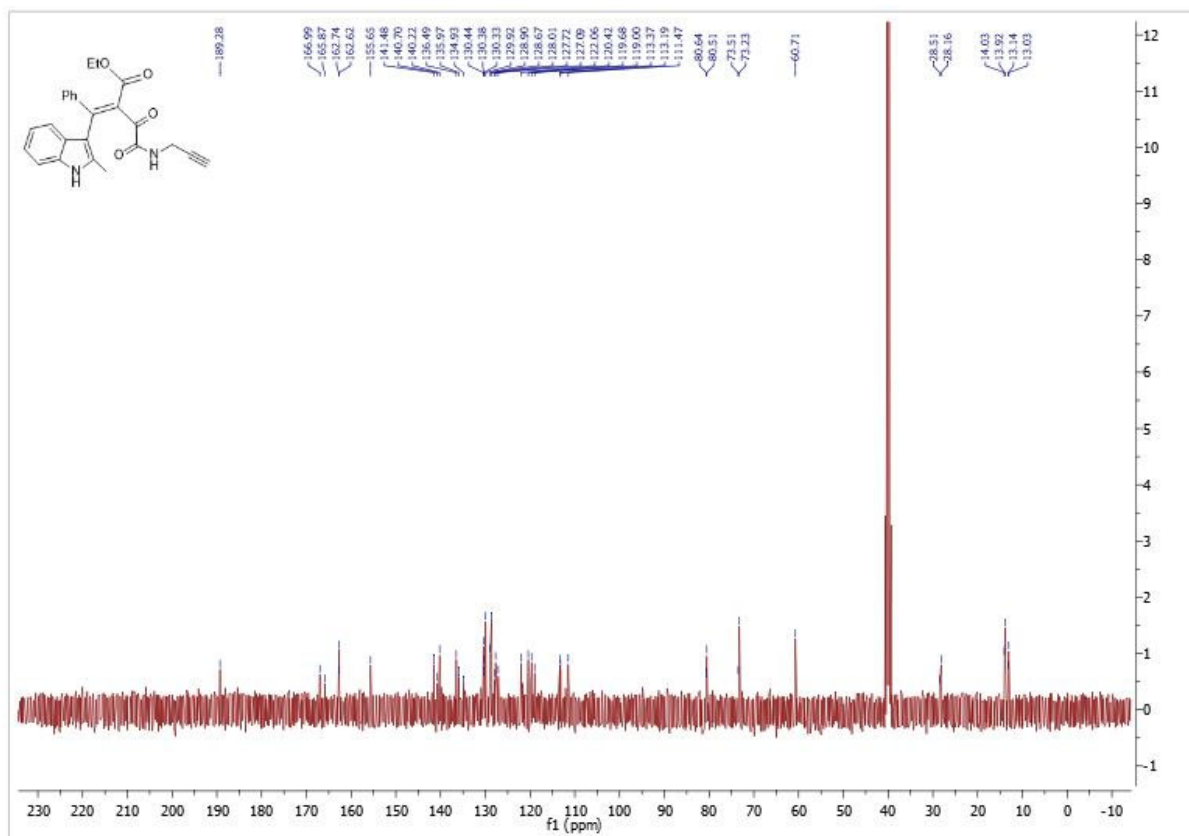

**<sup>13</sup>C-NMR spectrum of compound 5b**

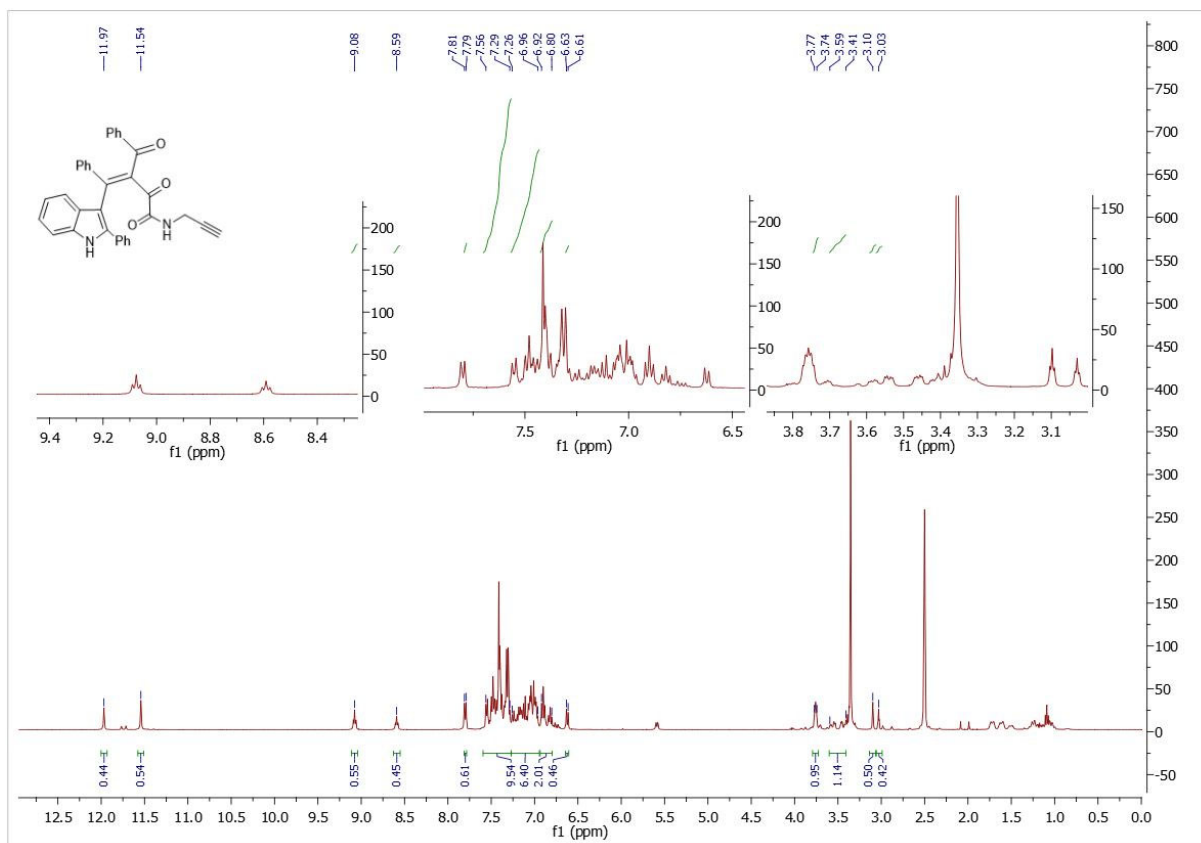

$^1\text{H-NMR}$  spectrum of compound **5c**

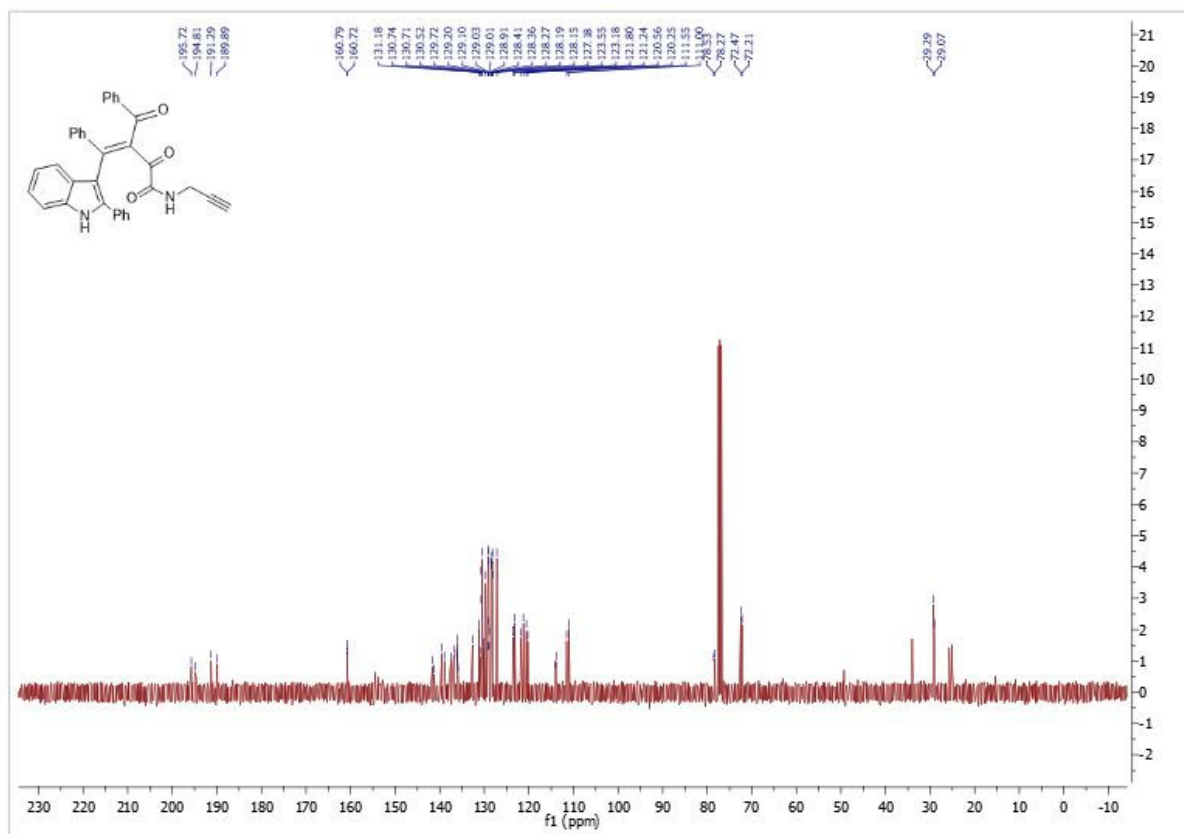

$^{13}\text{C-NMR}$  spectrum of compound **5c**

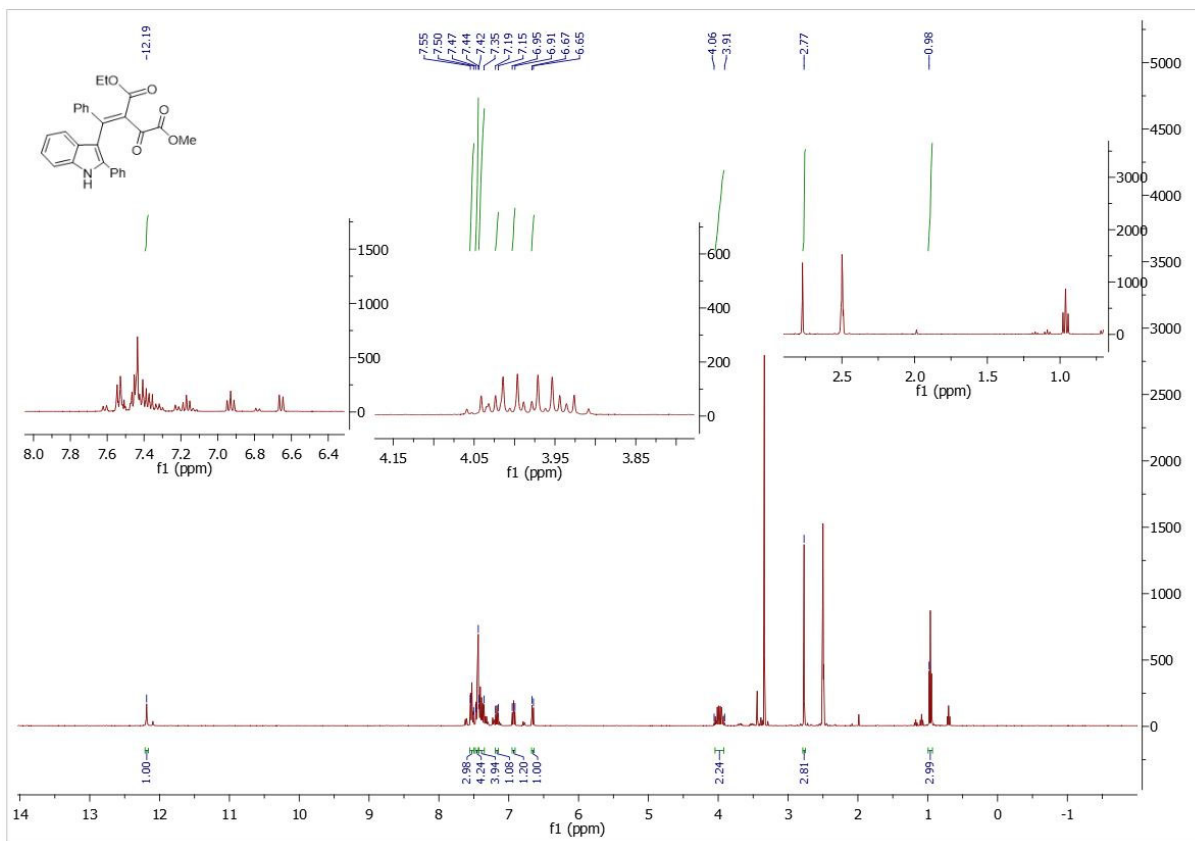

**<sup>1</sup>H-NMR spectrum of compound 5d**

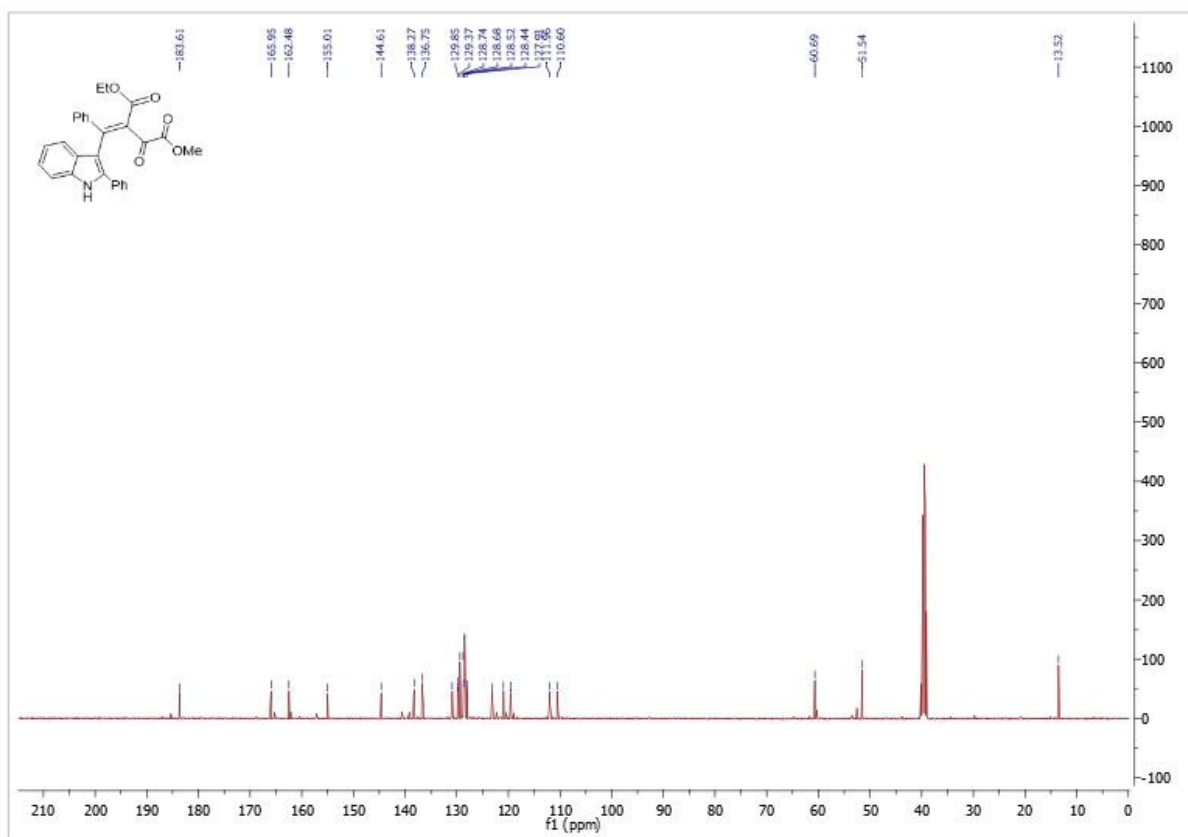

**<sup>13</sup>C-NMR spectrum of compound 5d**

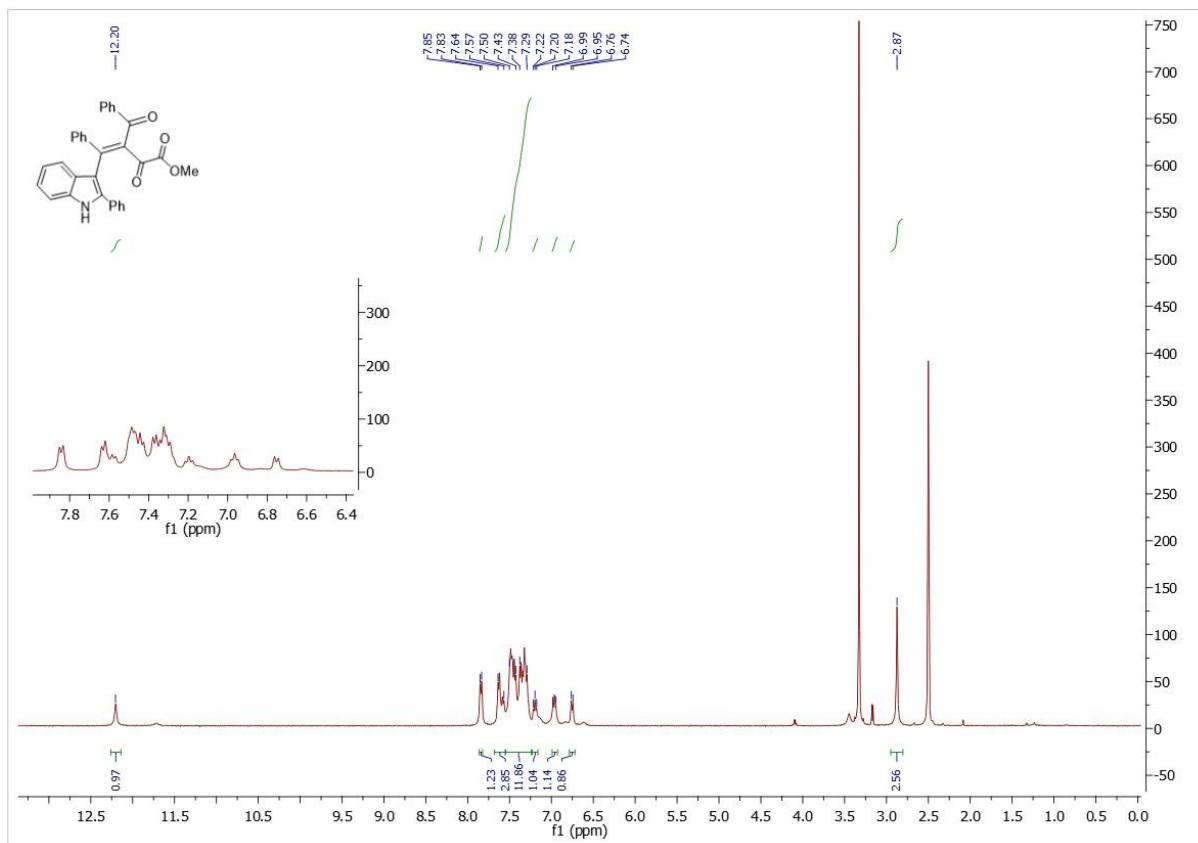

<sup>1</sup>H-NMR spectrum of compound 5e

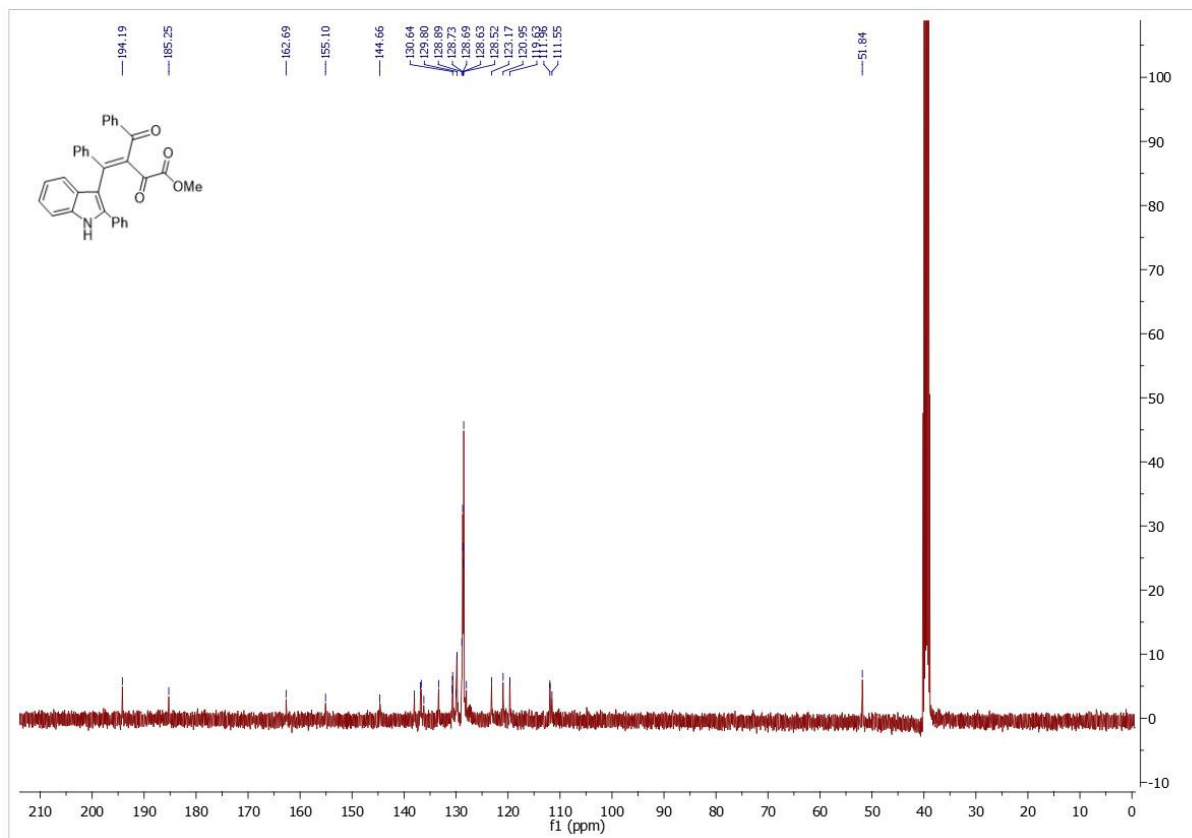

<sup>13</sup>C-NMR spectrum of compound 5e



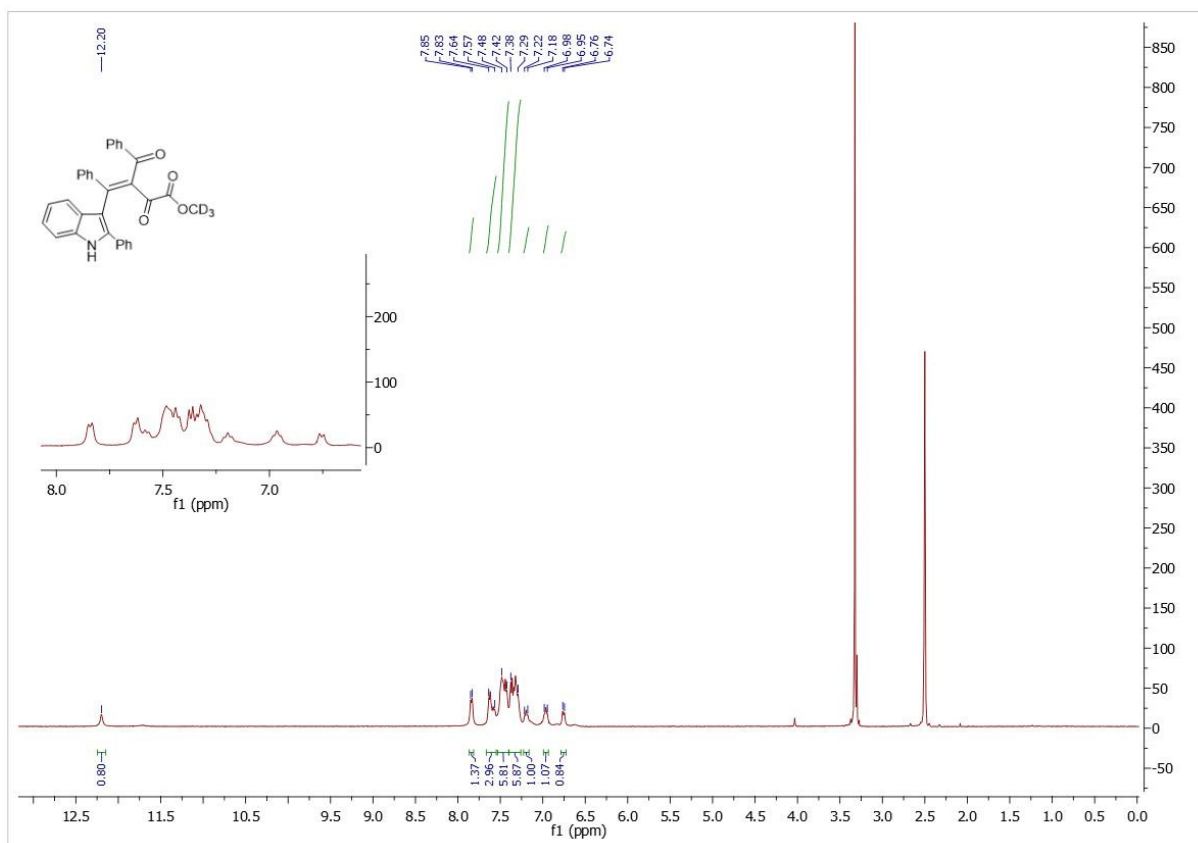

<sup>1</sup>H-NMR spectrum of compound **5f**

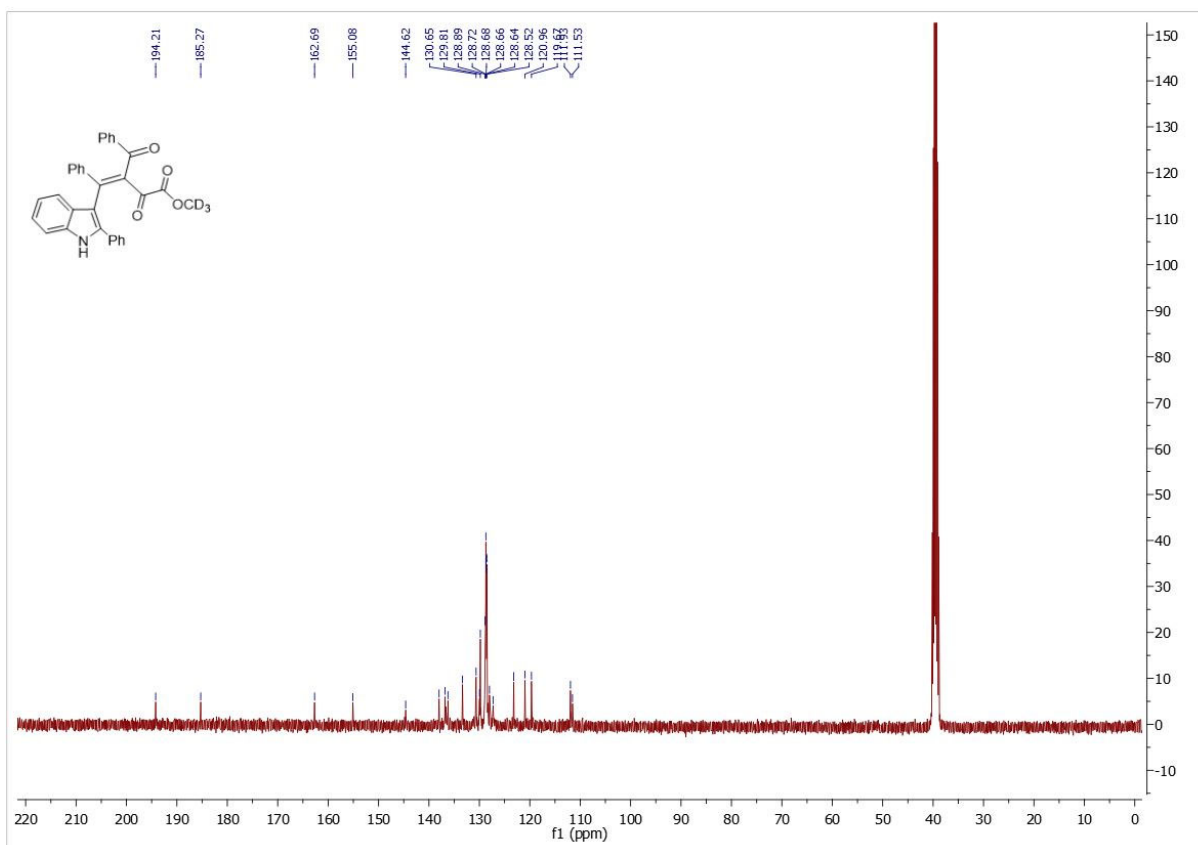

<sup>13</sup>C-NMR spectrum of compound **5f**

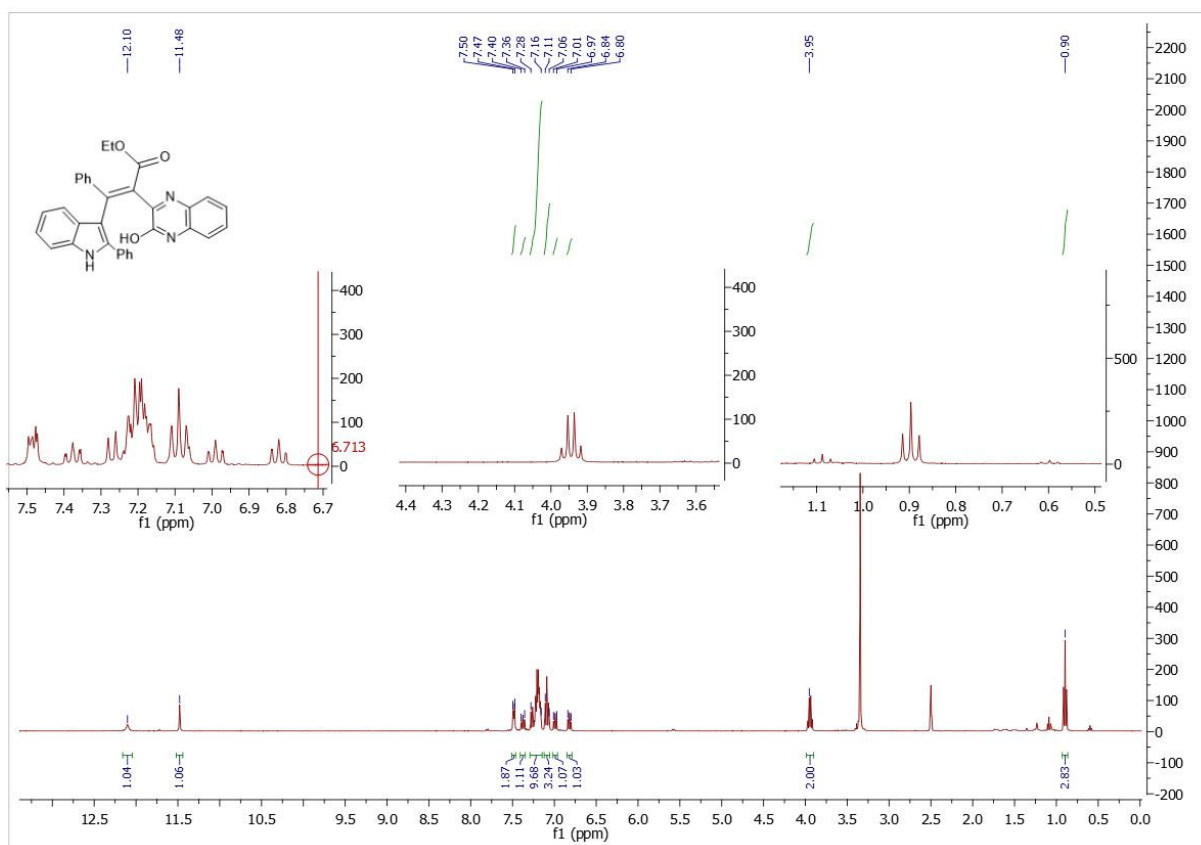

<sup>1</sup>H-NMR spectrum of compound 7a

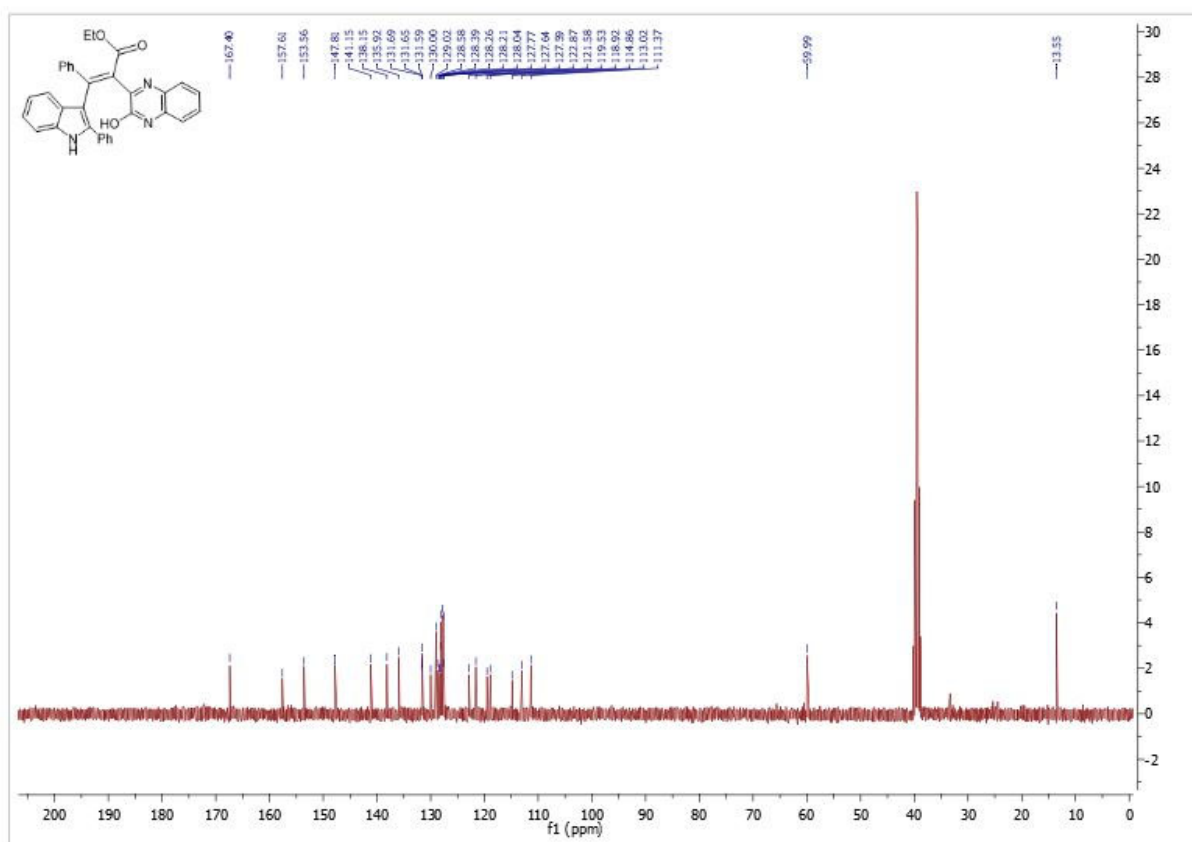

<sup>13</sup>C-NMR spectrum of compound 7a

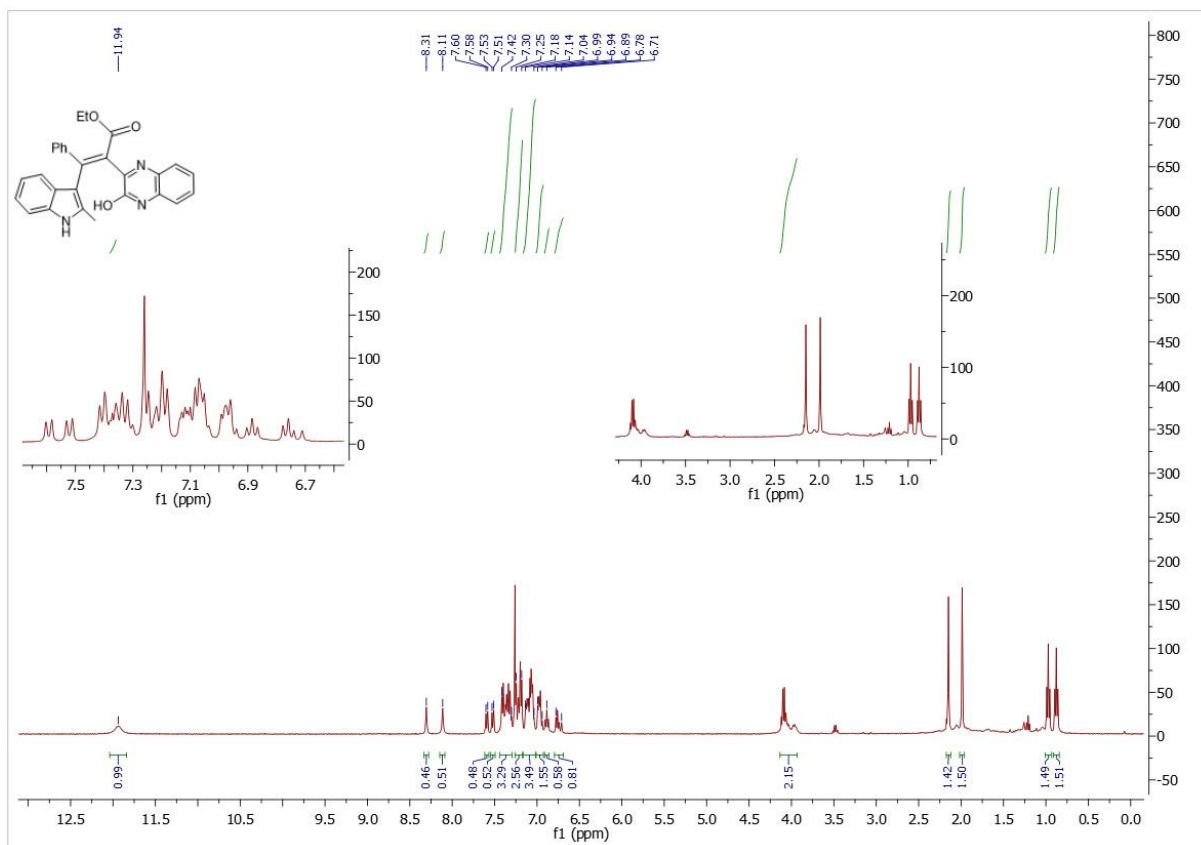

**<sup>1</sup>H-NMR spectrum of compound 7b**

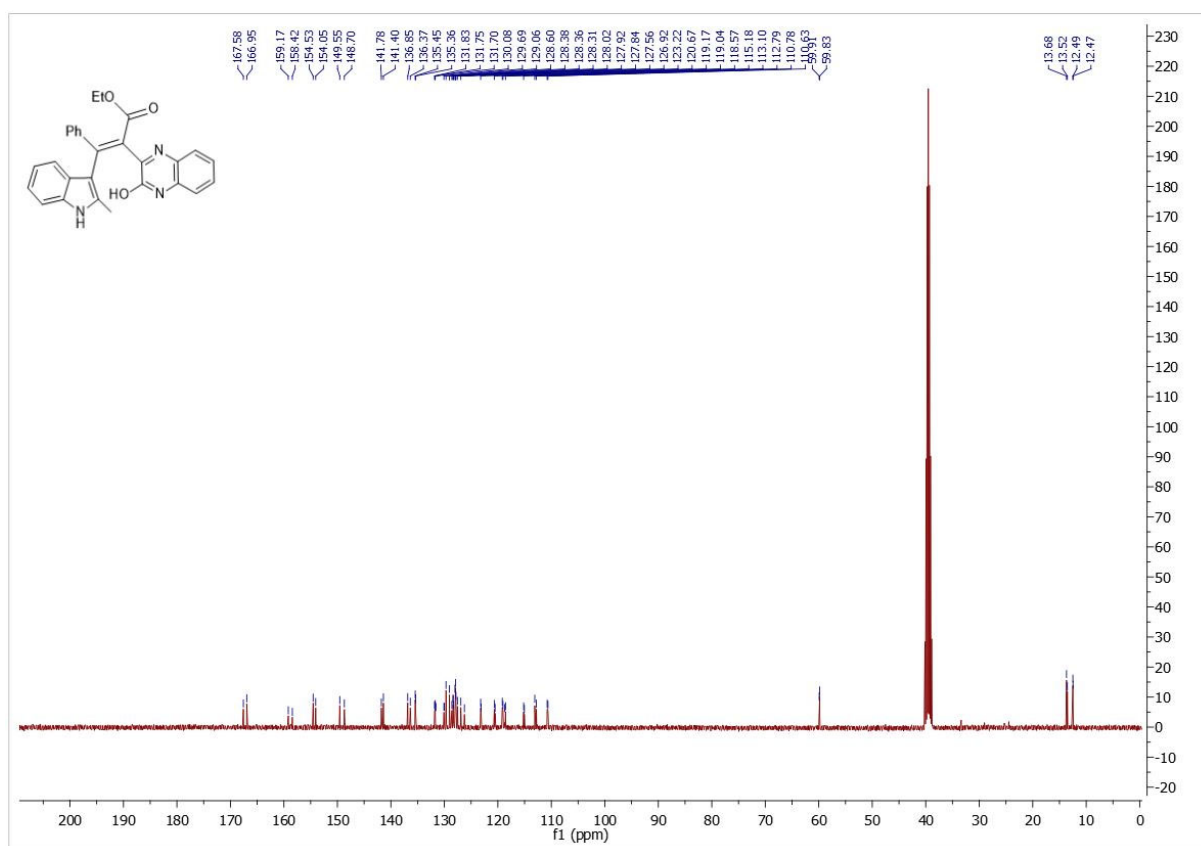

**<sup>13</sup>C-NMR spectrum of compound 7b**

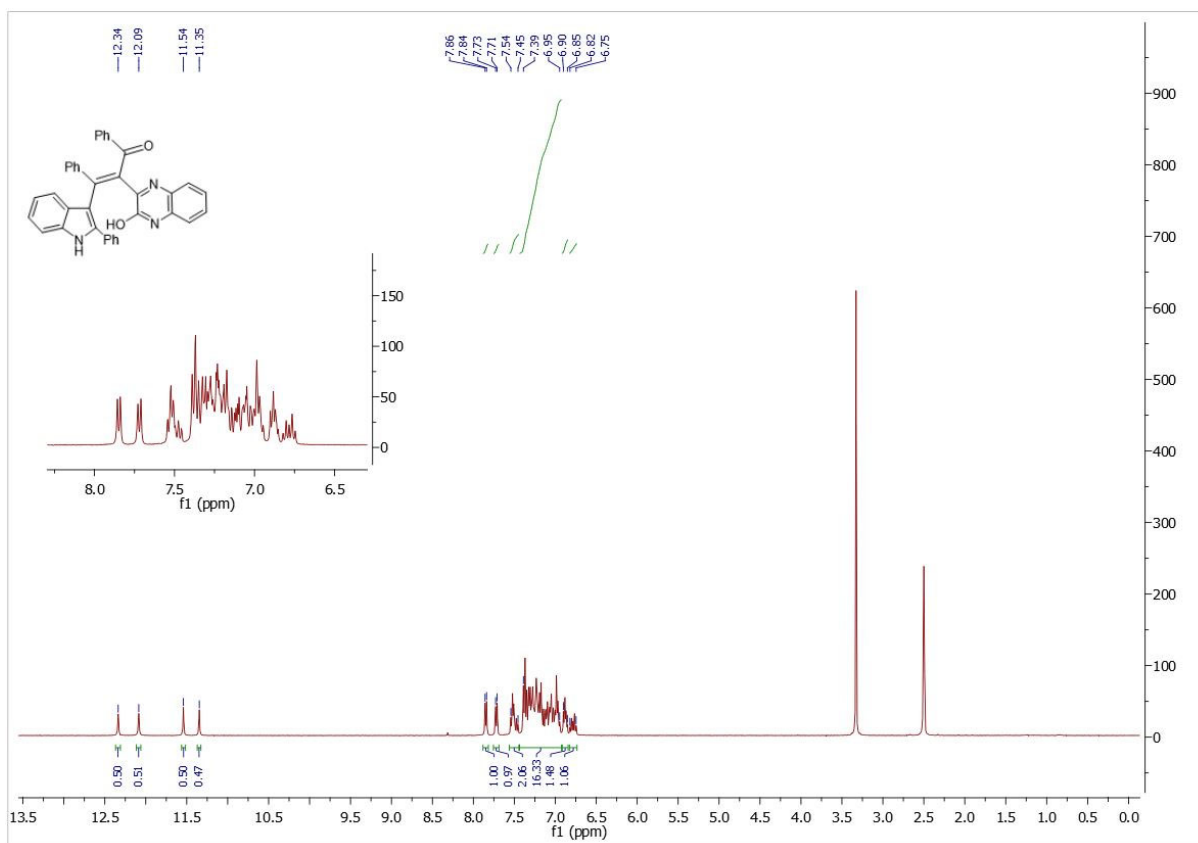

<sup>1</sup>H-NMR spectrum of compound 7c

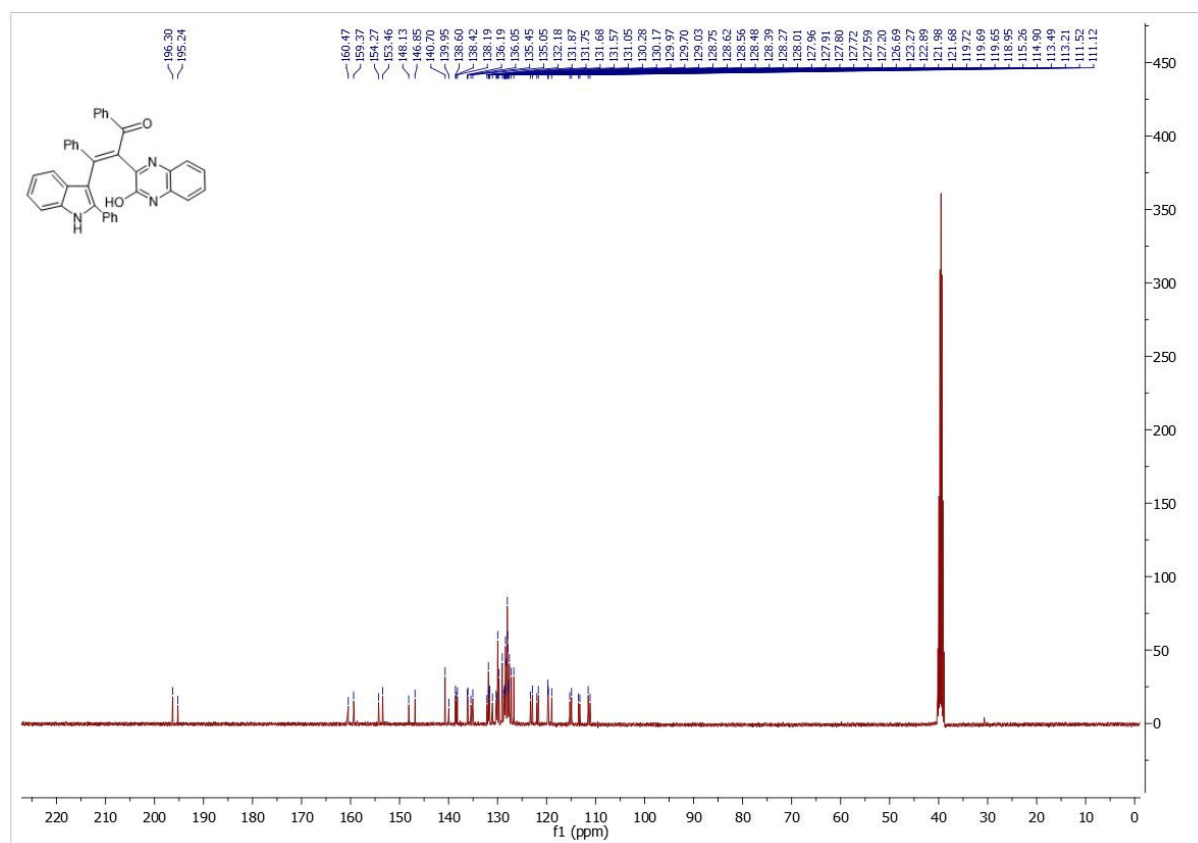

<sup>13</sup>C-NMR spectrum of compound 7c

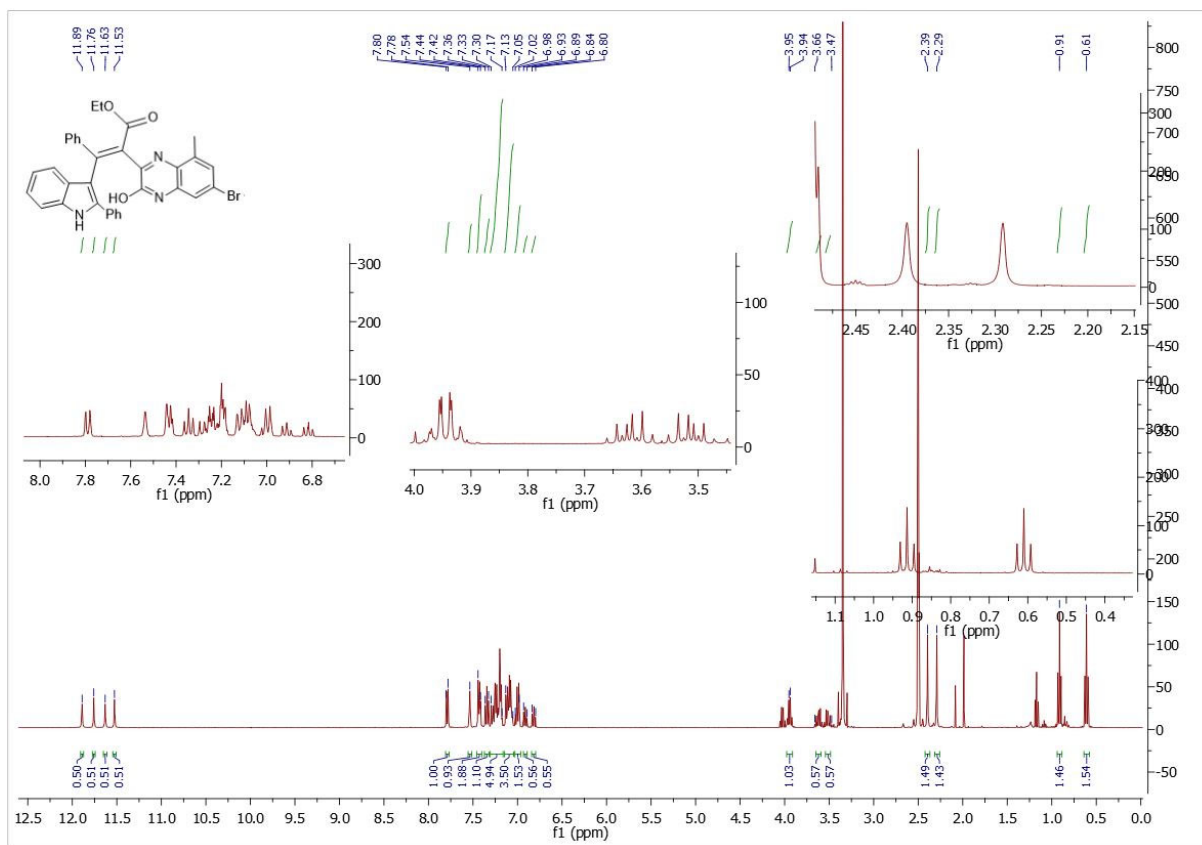

**<sup>1</sup>H-NMR spectrum of compound 7d**

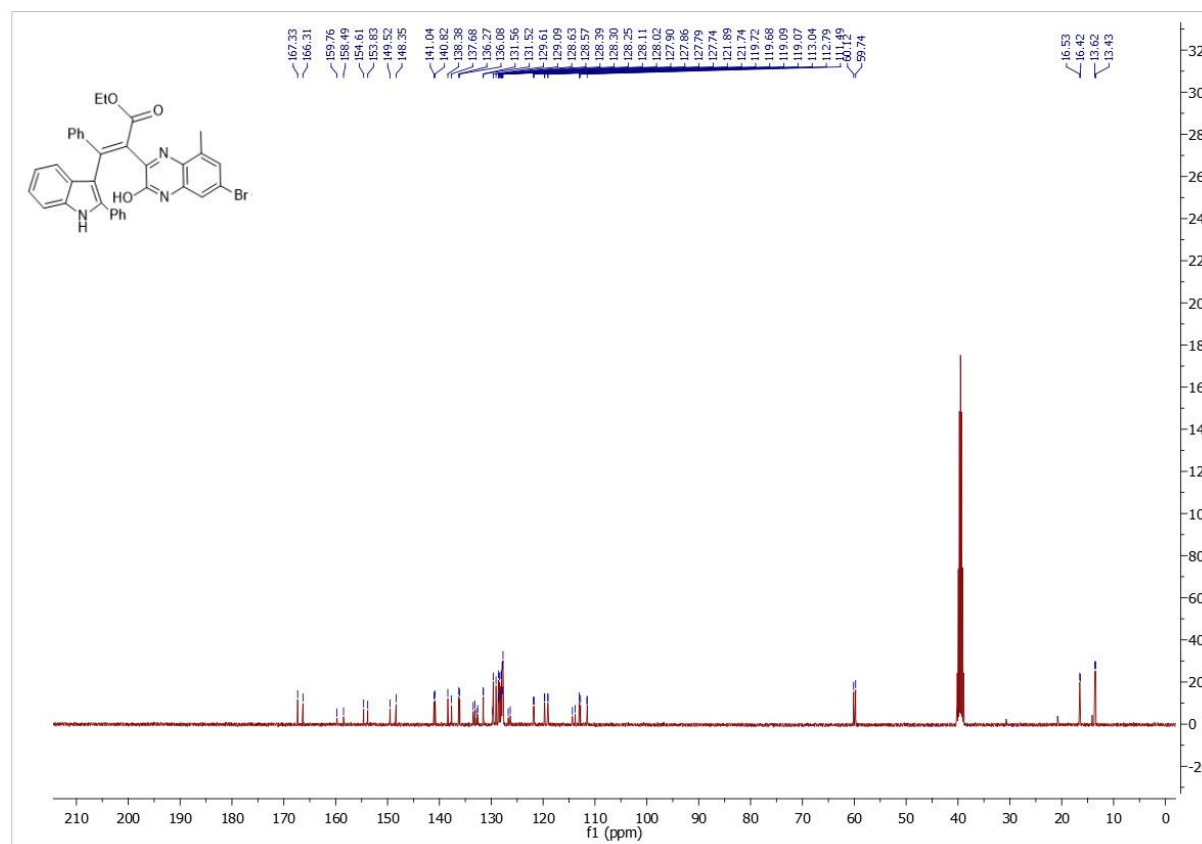

**<sup>13</sup>C-NMR spectrum of compound 7d**

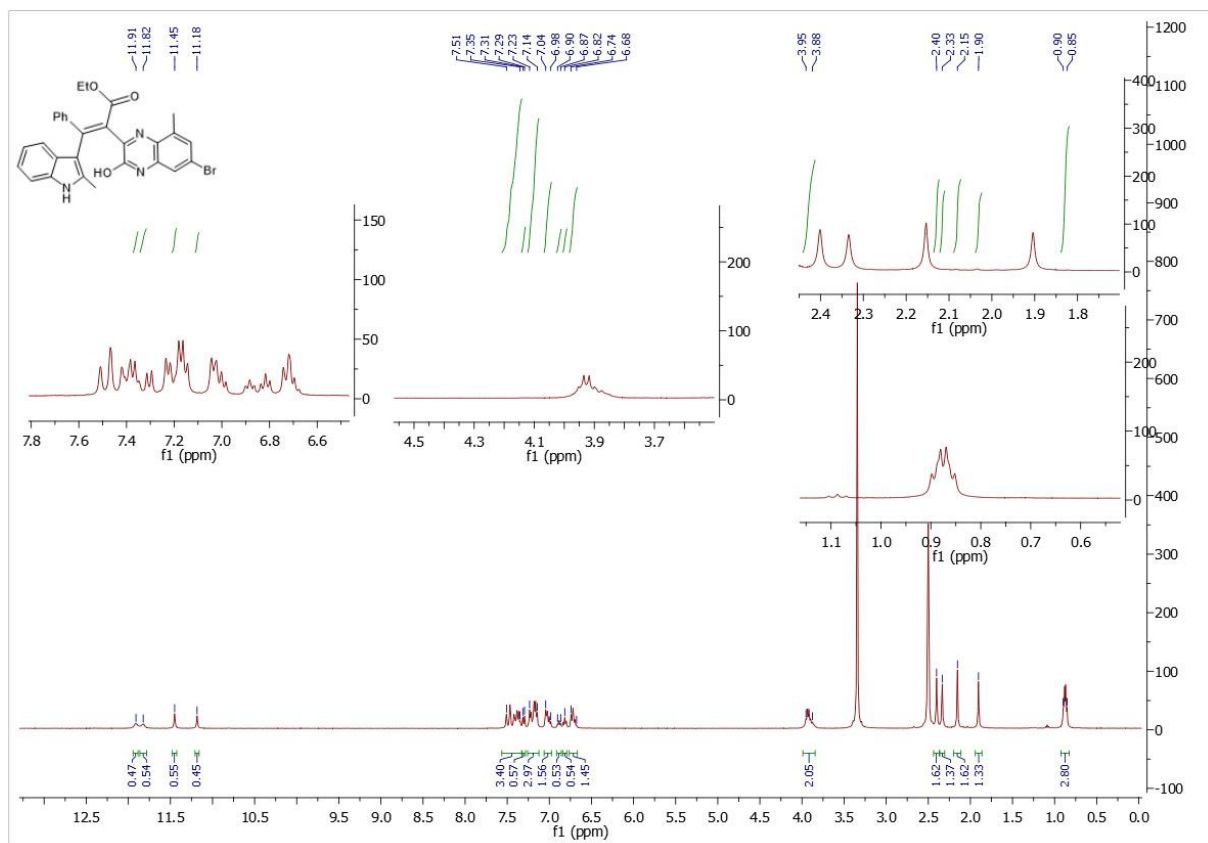

<sup>1</sup>H-NMR spectrum of compound 7e

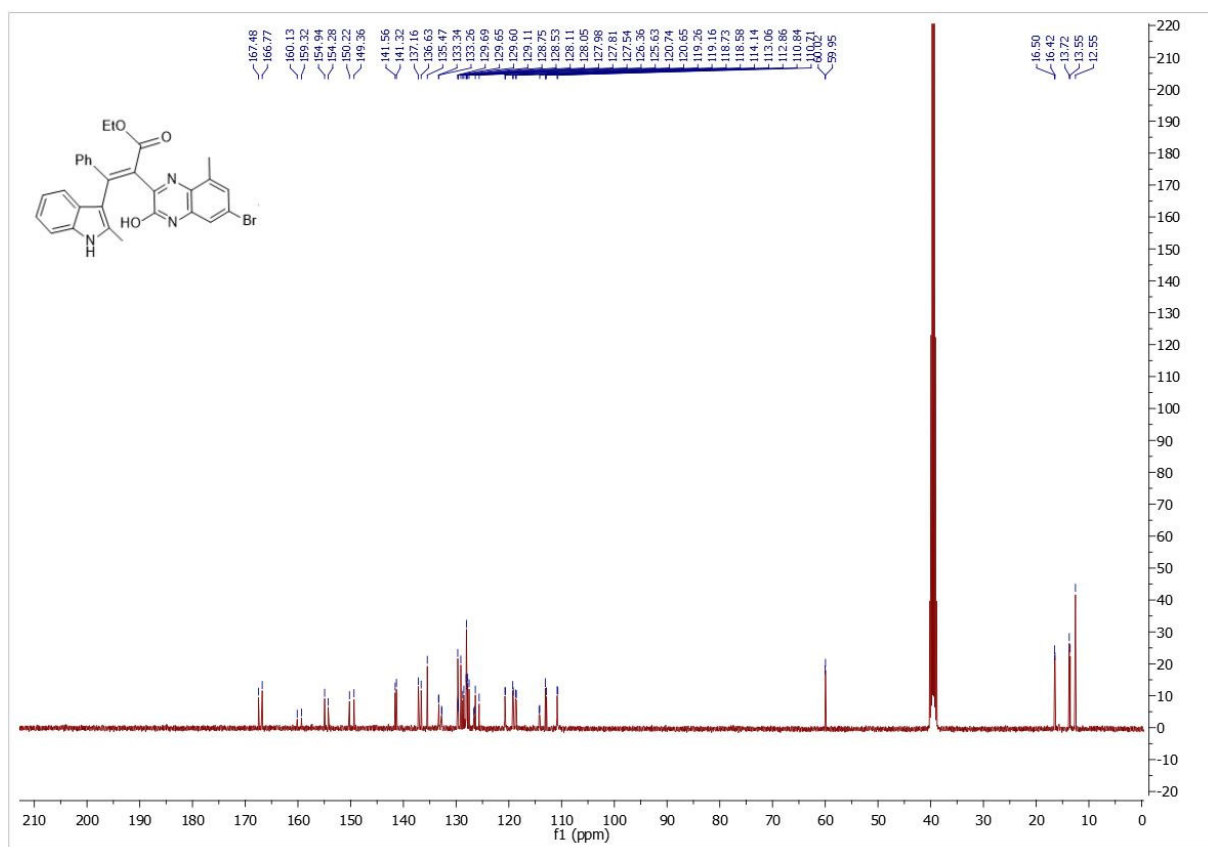

<sup>13</sup>C-NMR spectrum of compound 7e

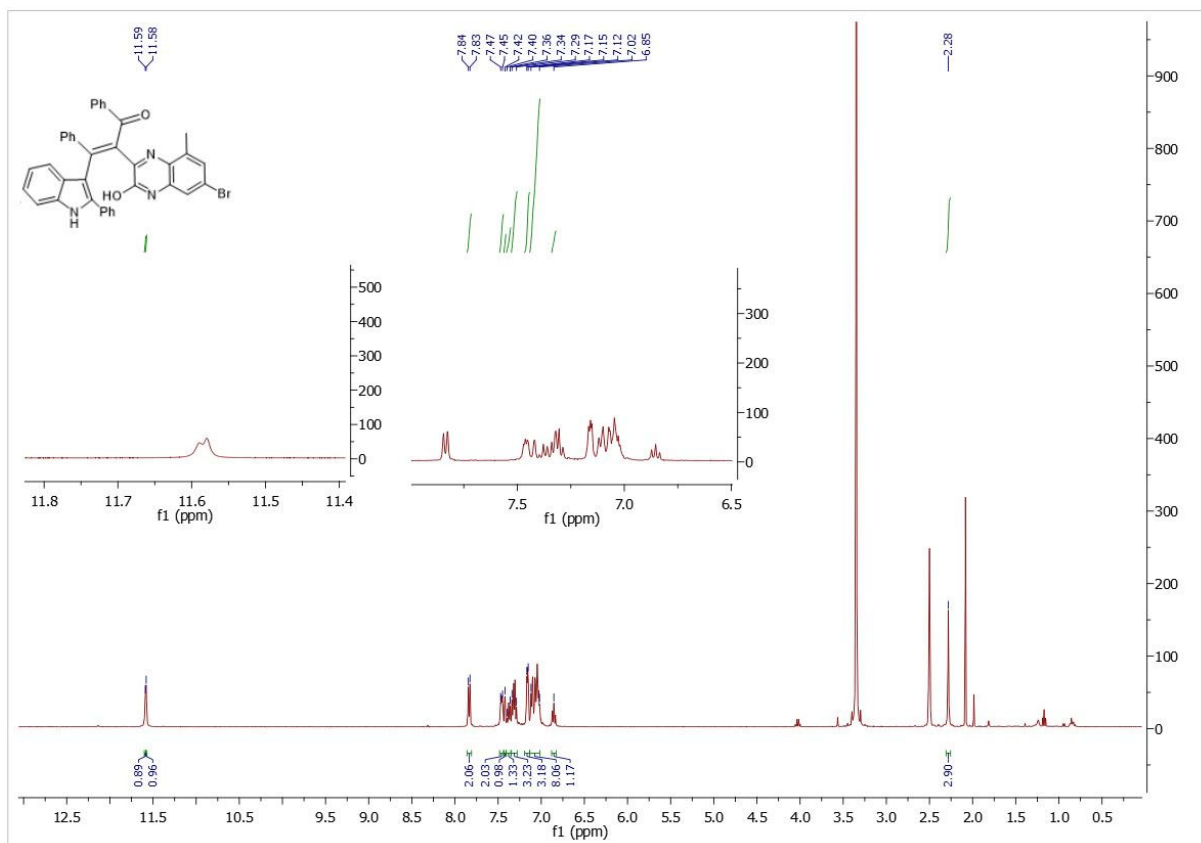

<sup>1</sup>H-NMR spectrum of compound 7f

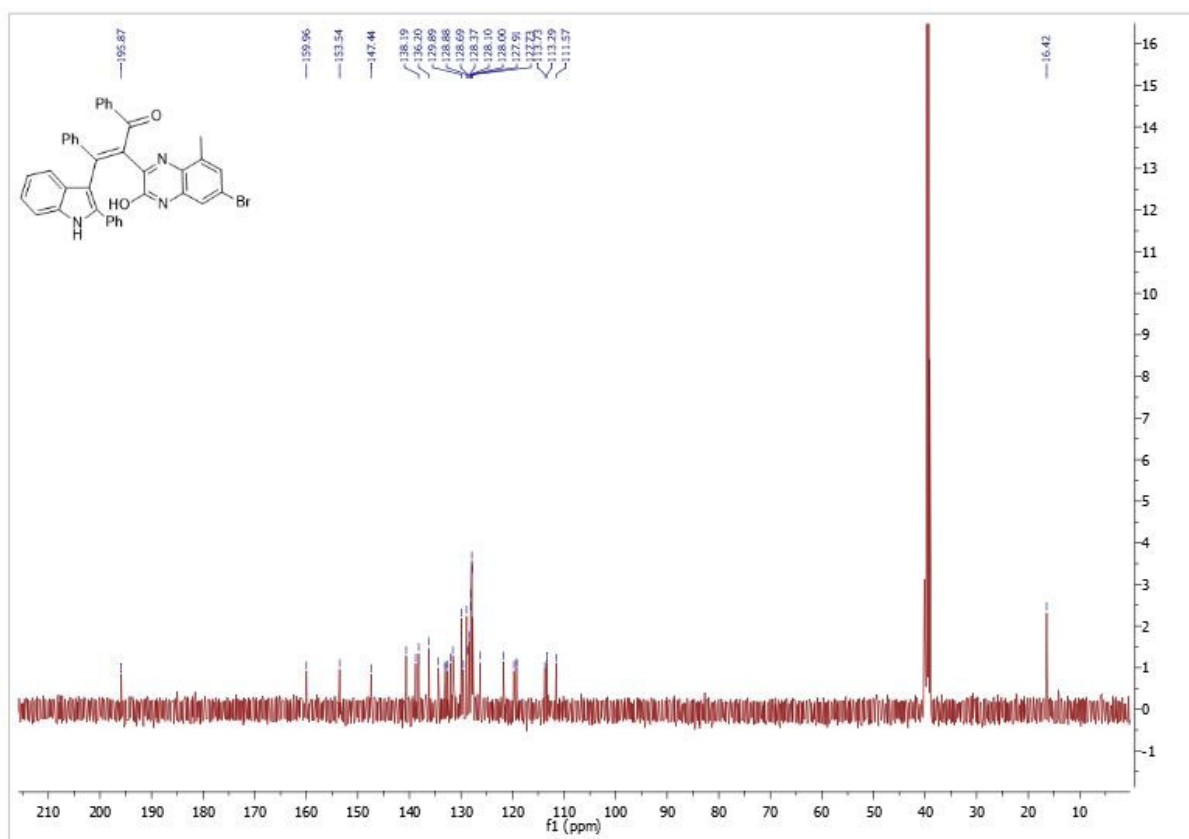

<sup>13</sup>C-NMR spectrum of compound 7f



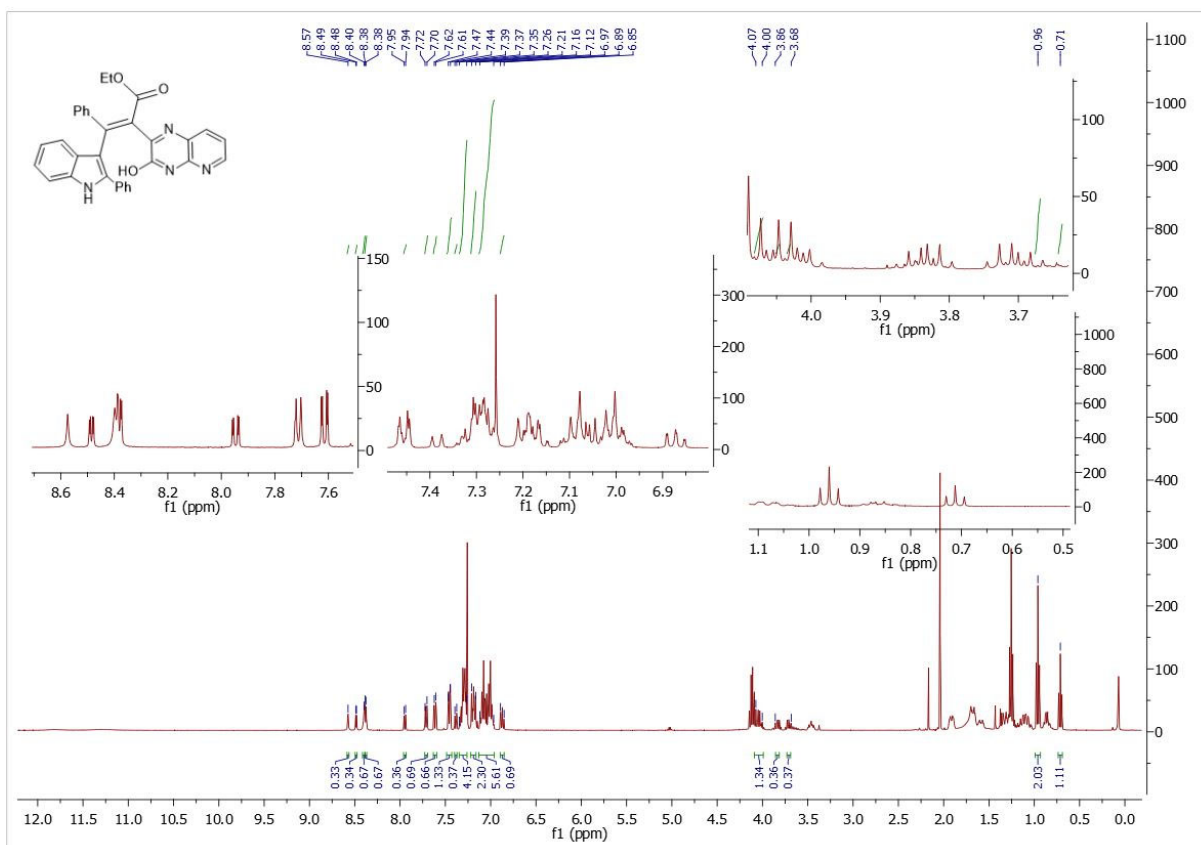

<sup>1</sup>H-NMR spectrum of compound 7g

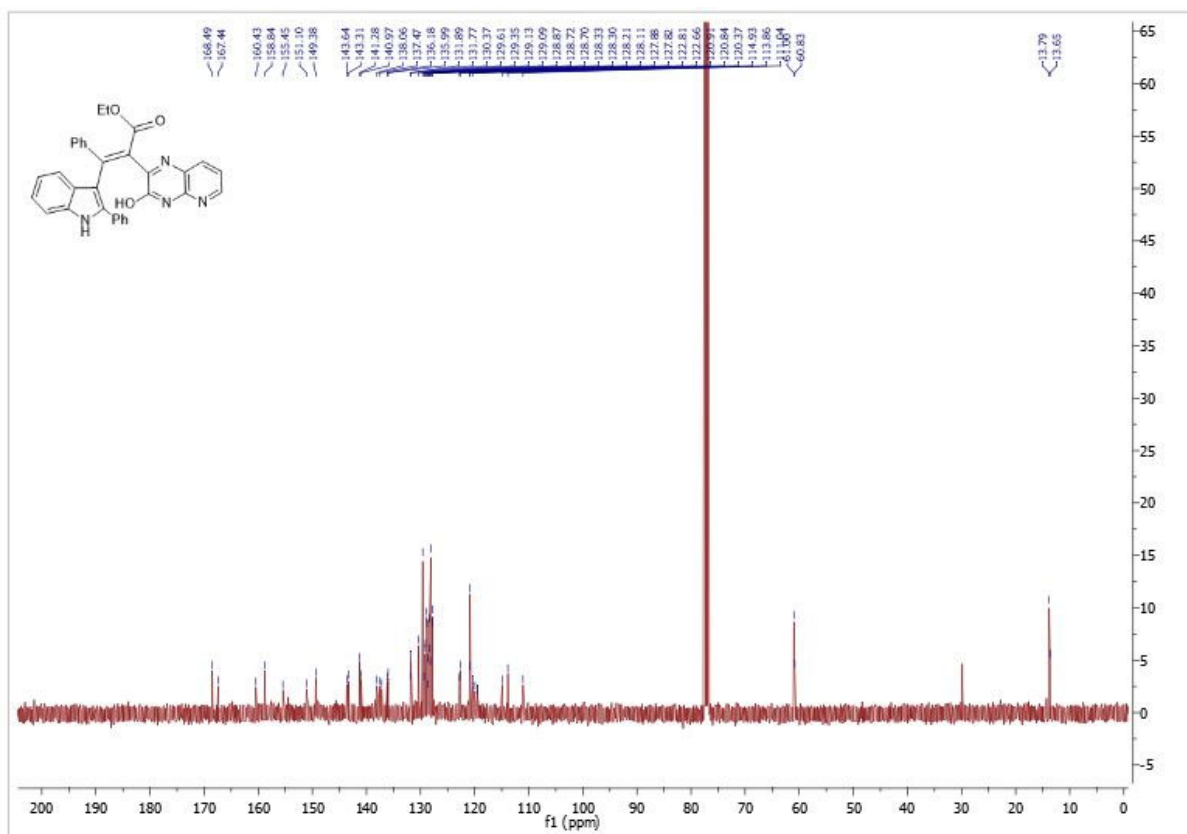

<sup>13</sup>C-NMR spectrum of compound 7g



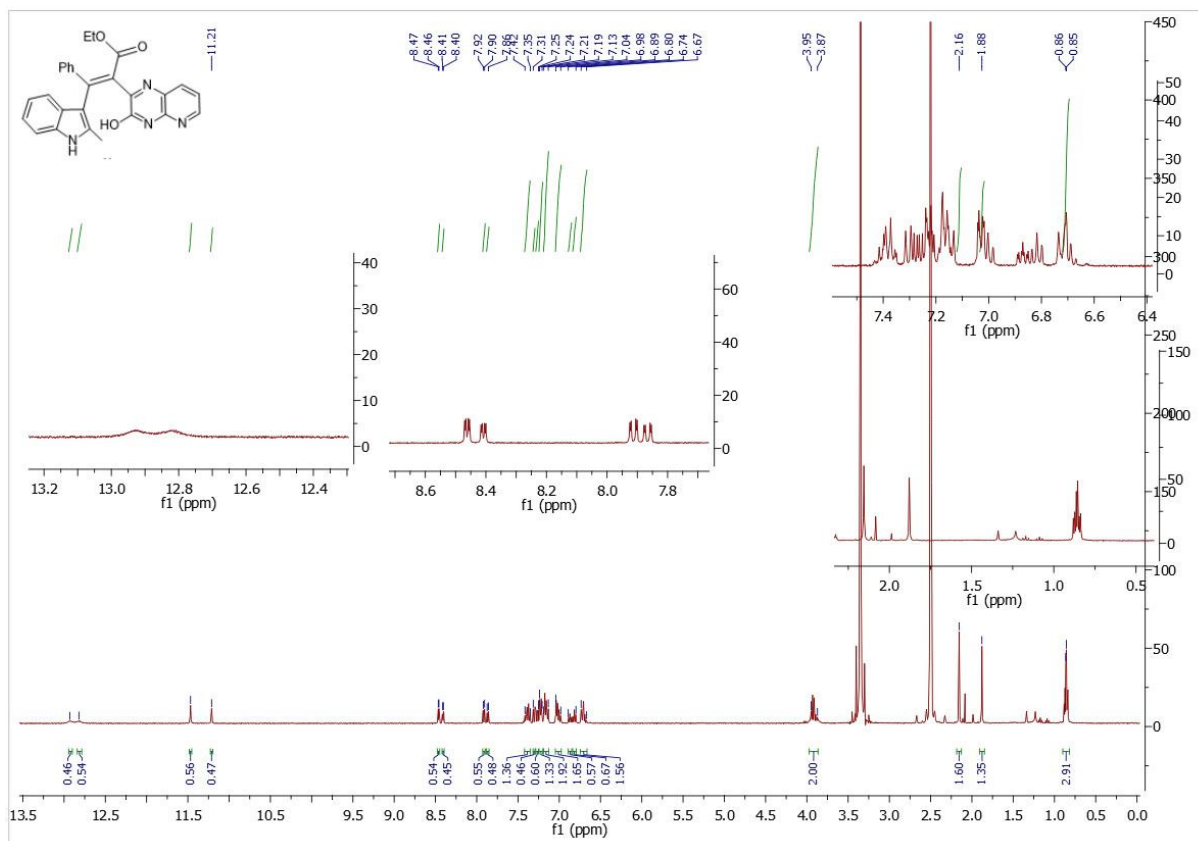

<sup>1</sup>H-NMR spectrum of compound 7h

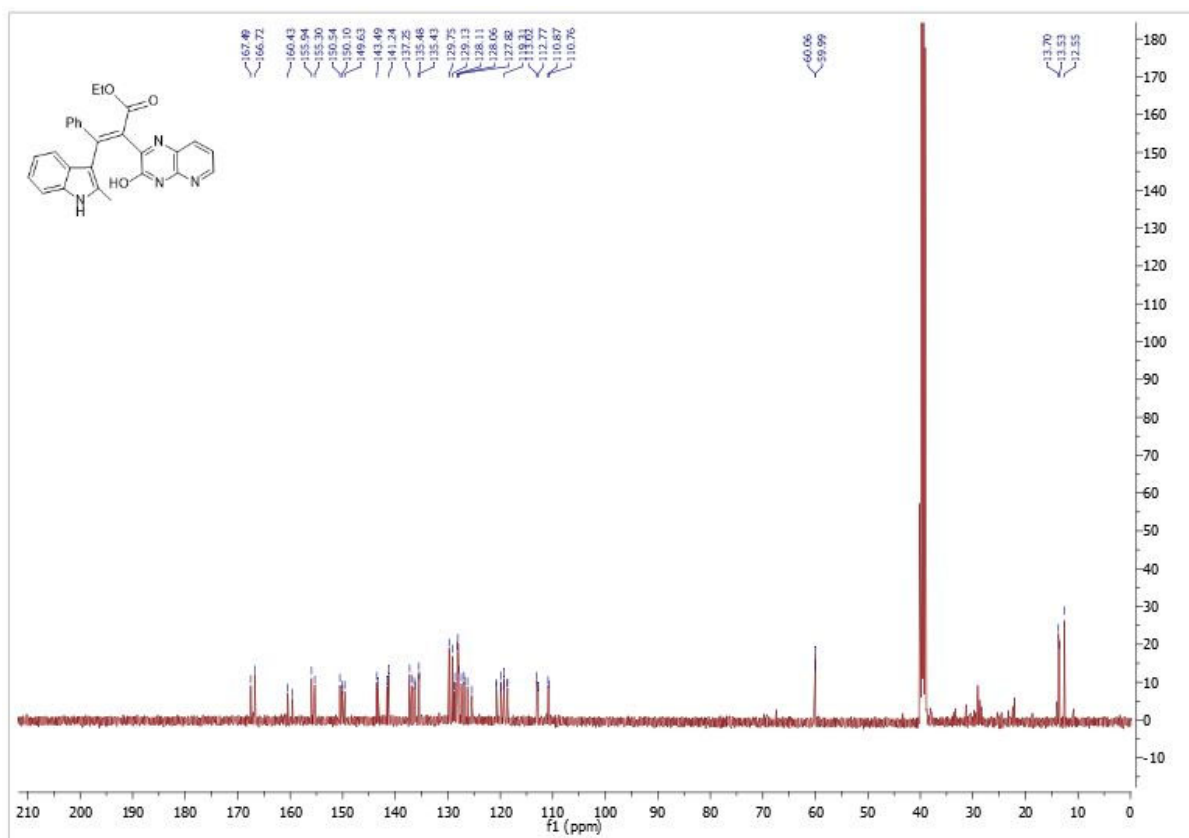

<sup>13</sup>C-NMR spectrum of compound 7h

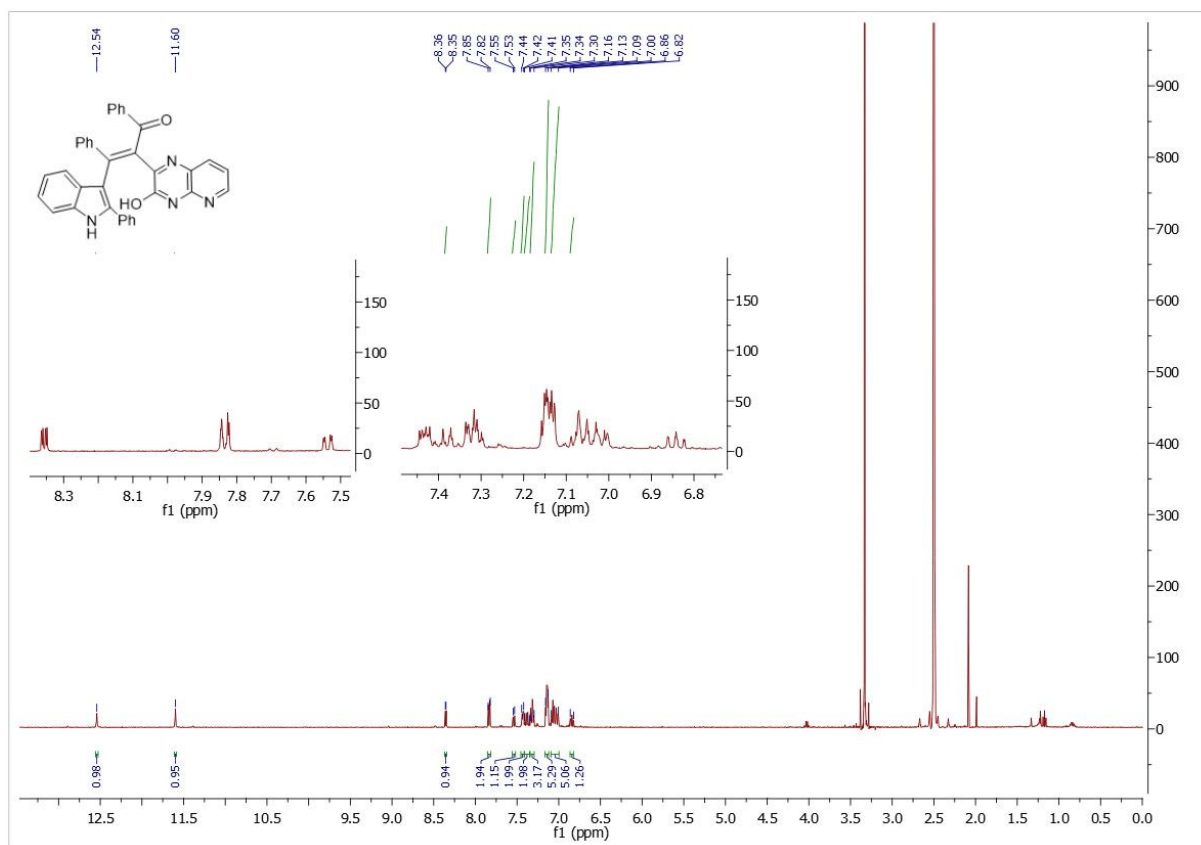

<sup>1</sup>H-NMR spectrum of compound **7i**

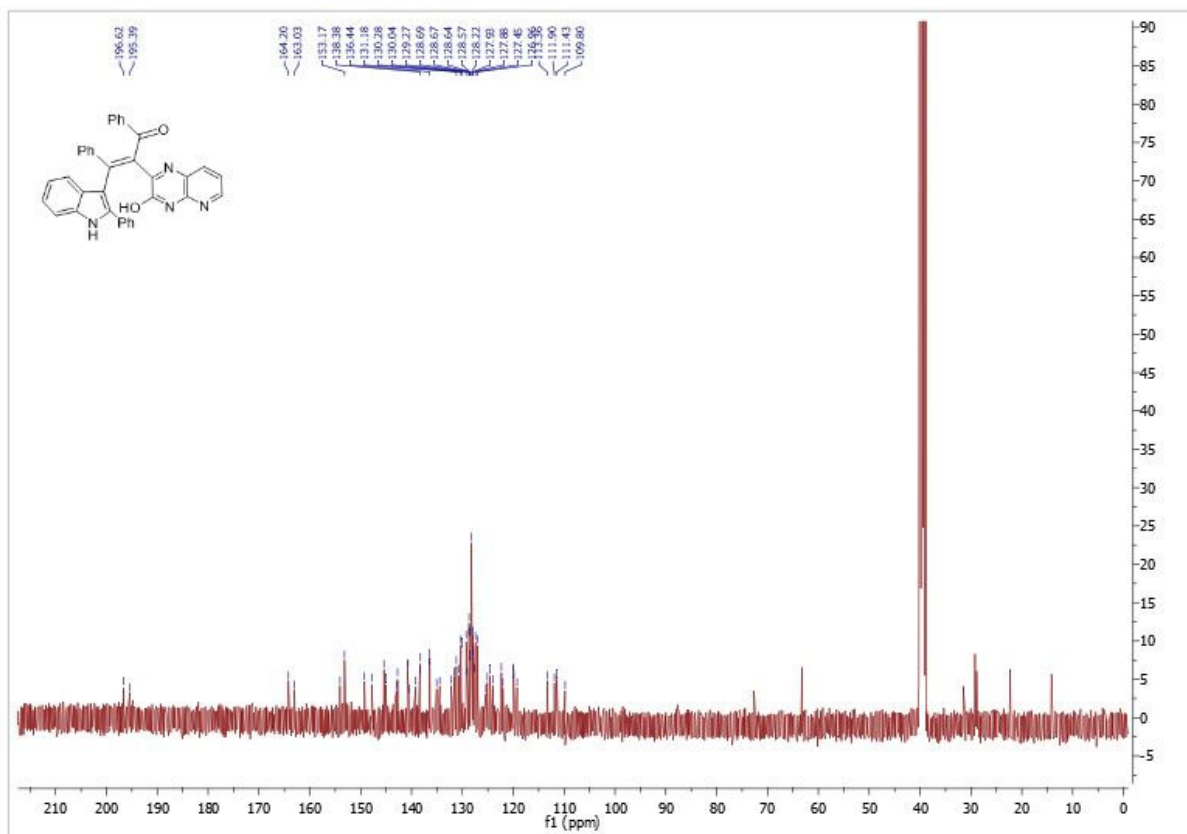

<sup>13</sup>C-NMR spectrum of compound **7i**

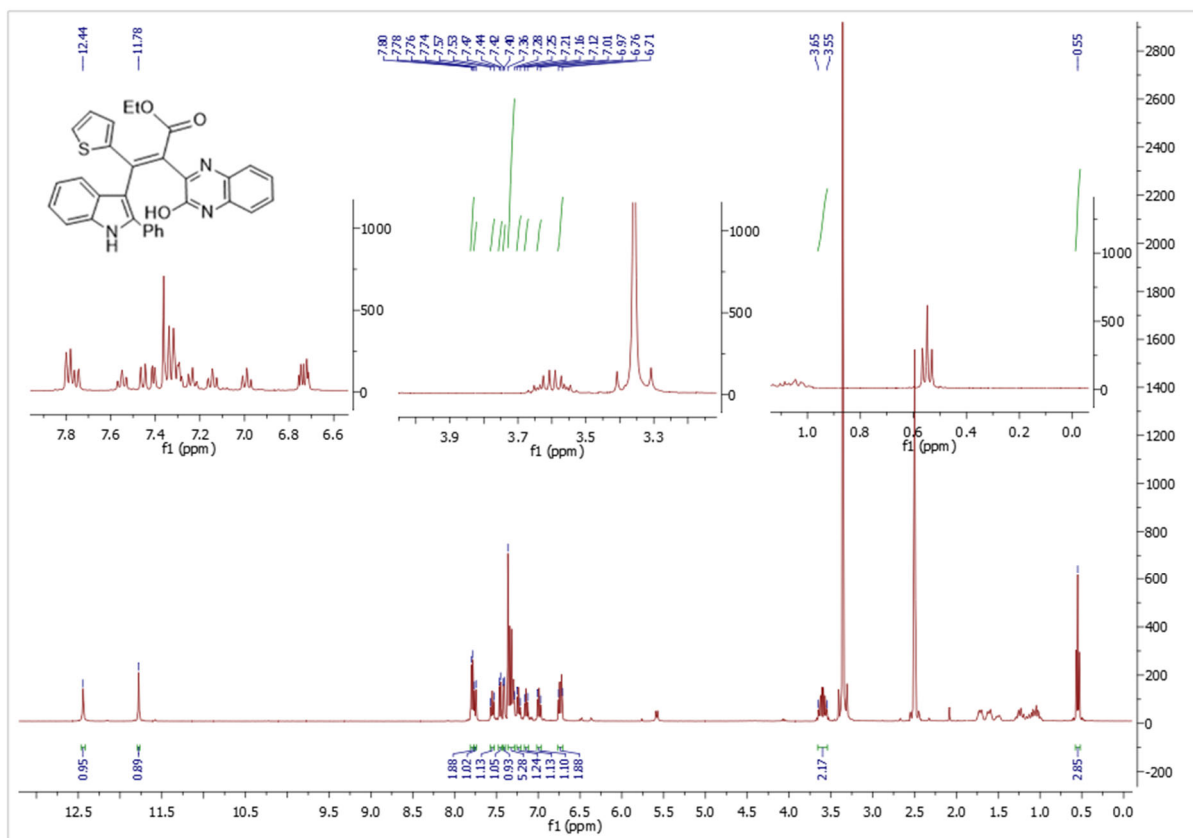

<sup>1</sup>H-NMR spectrum of compound **7j**

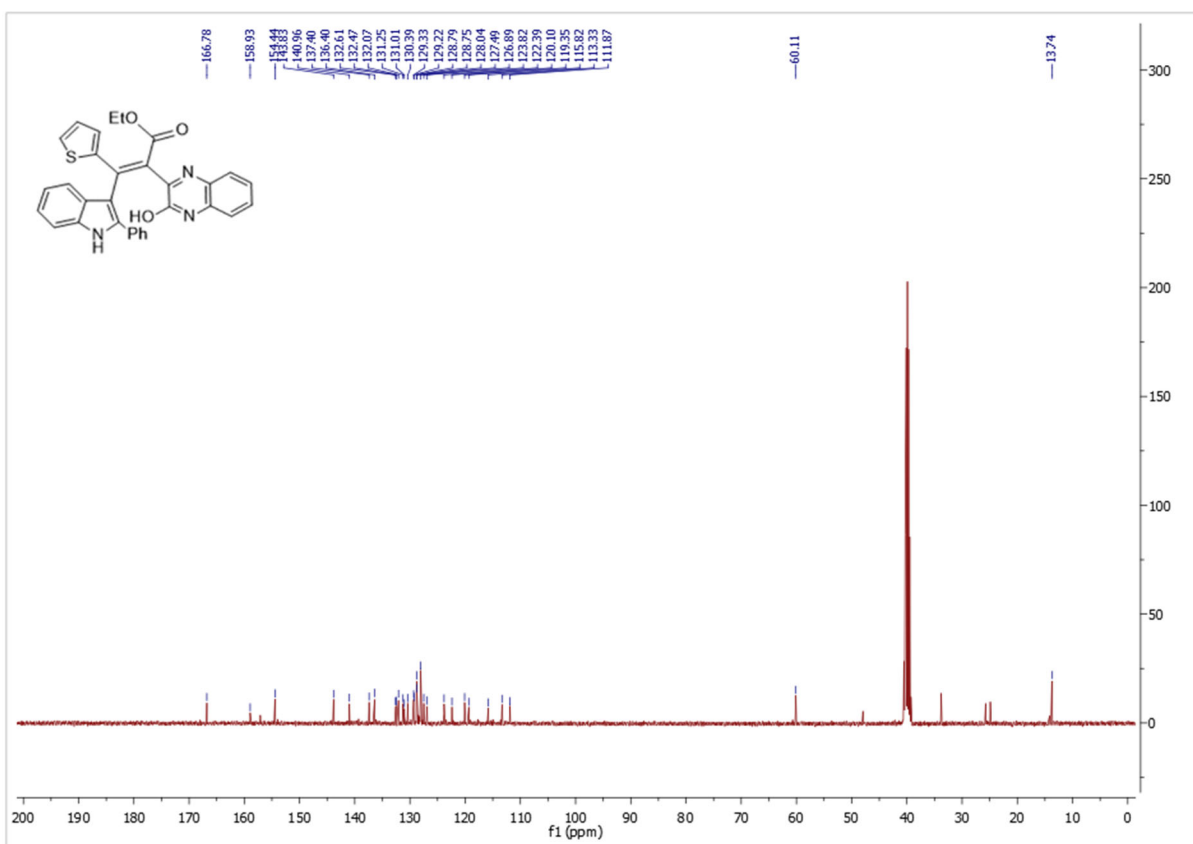

<sup>13</sup>C-NMR spectrum of compound **7j**

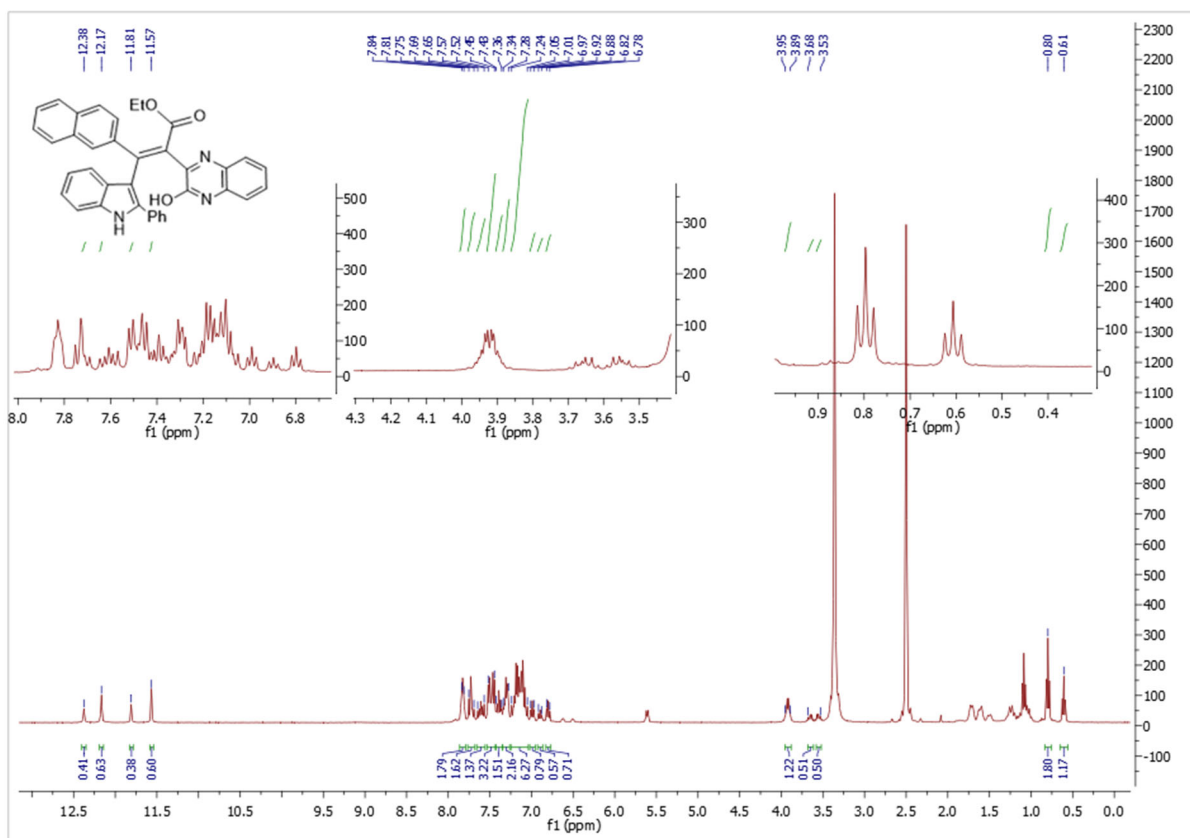

<sup>1</sup>H-NMR spectrum of compound 7k

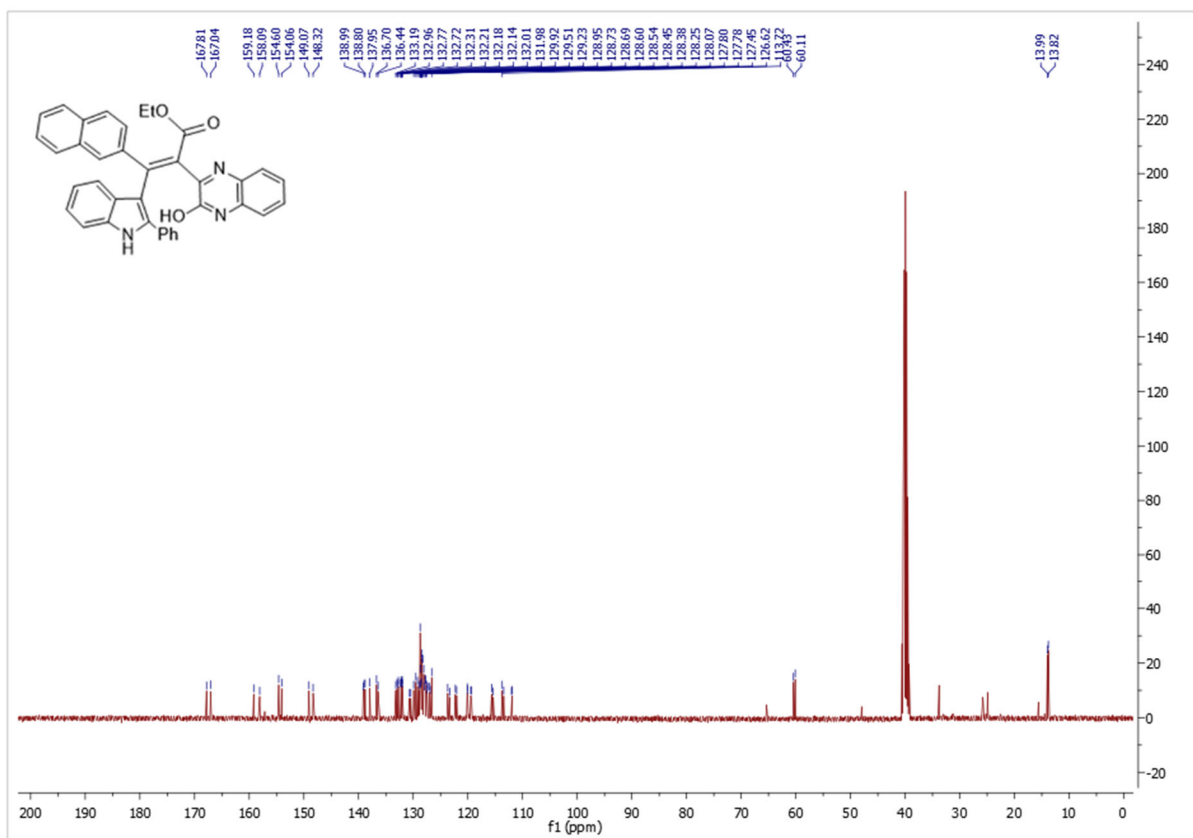

<sup>13</sup>C-NMR spectrum of compound 7k

## 7. Copies of LC/MS spectra

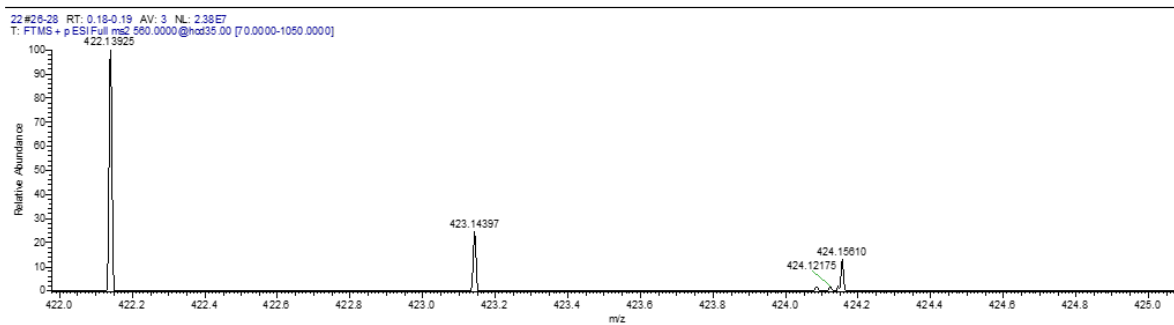

LC/MS Spectrum of compound **4a**

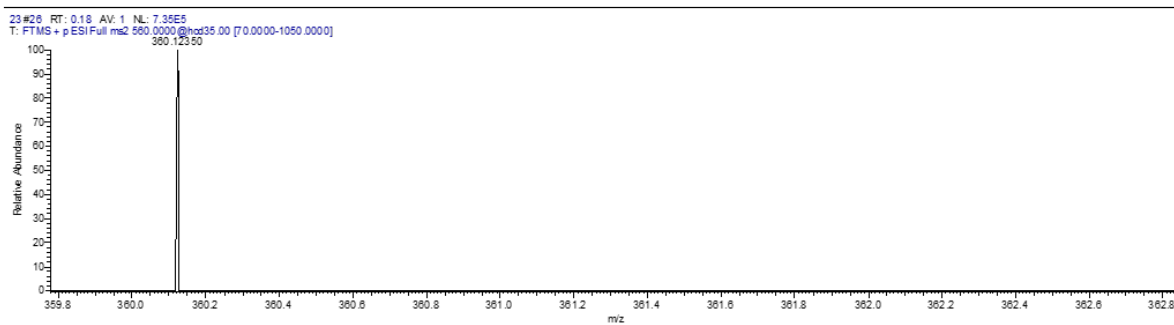

LC/MS Spectrum of compound **4b**

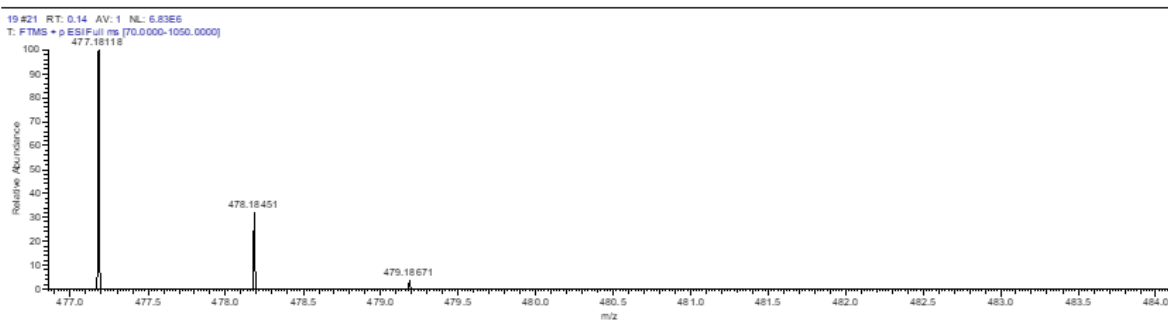

LC/MS Spectrum of compound **5a**

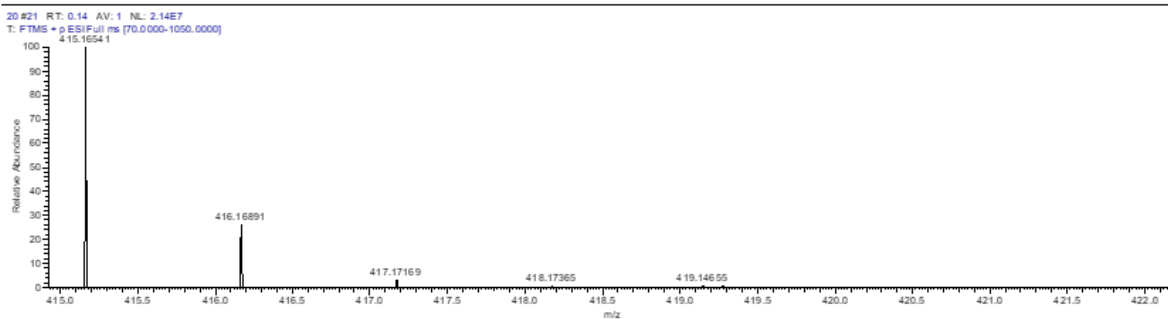

LC/MS Spectrum of compound **5b**

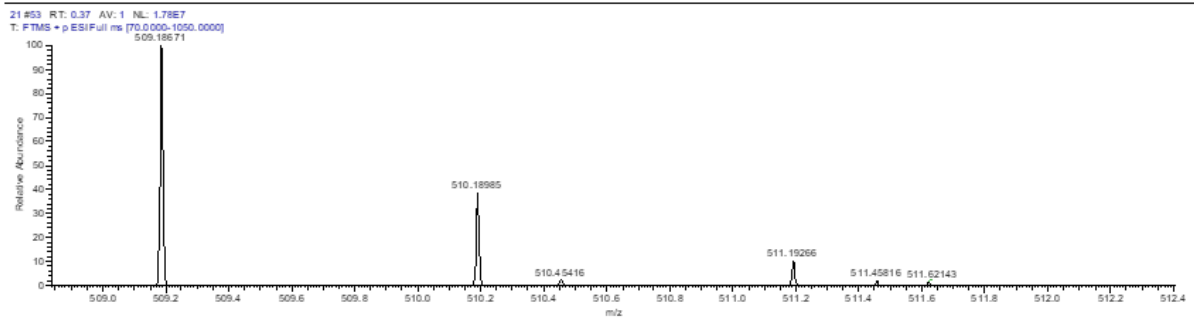

LC/MS Spectrum of compound **5c**

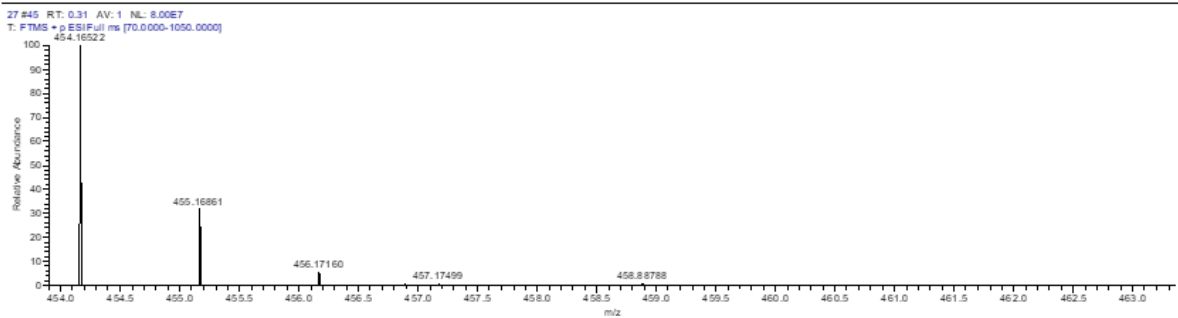

LC/MS Spectrum of compound **5d**

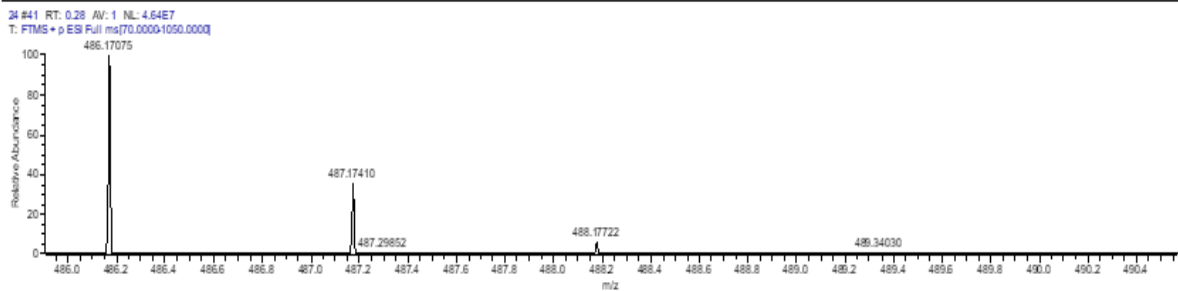

LC/MS Spectrum of compound **5e**

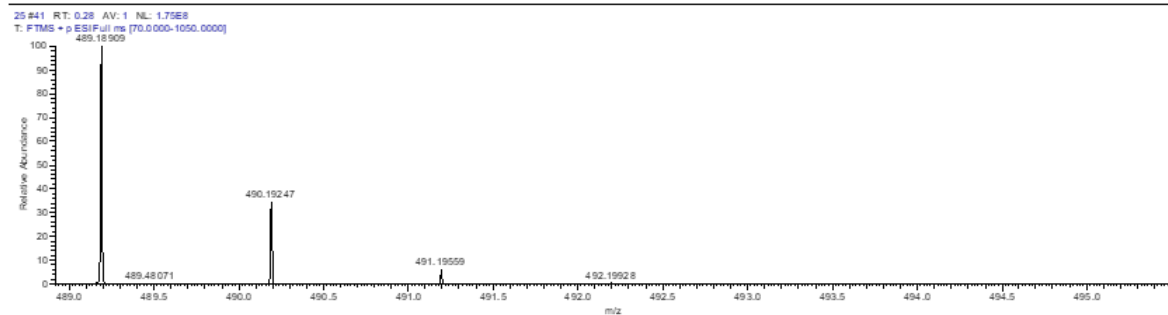

LC/MS Spectrum of compound **5f**

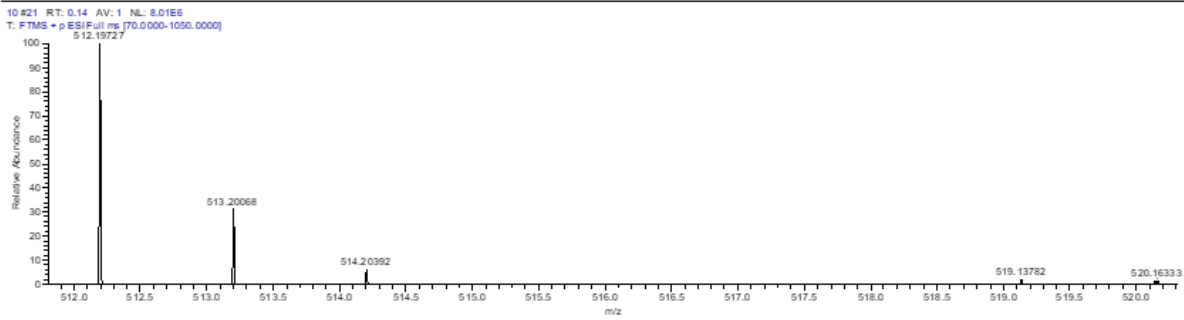

LC/MS Spectrum of compound **7a**

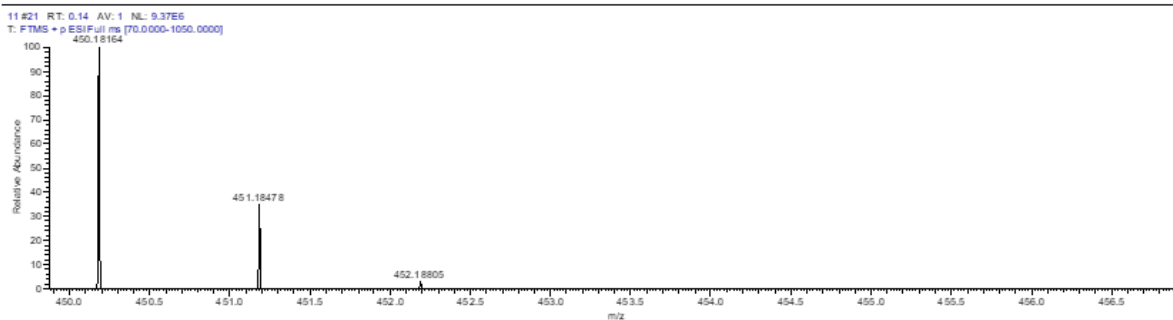

LC/MS Spectrum of compound **7b**

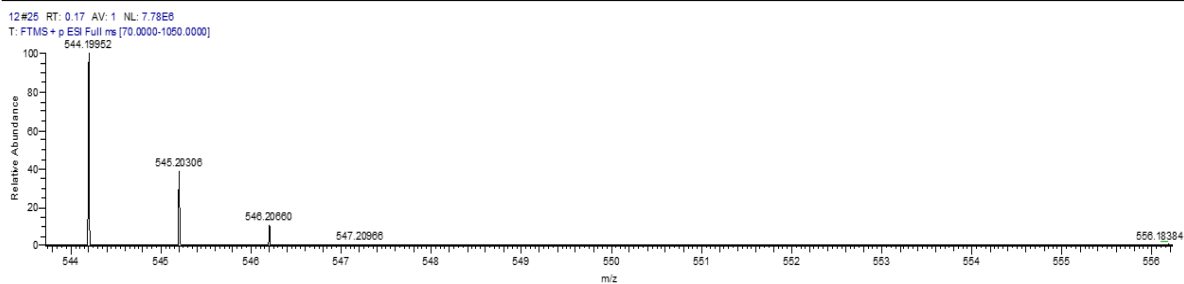

LC/MS Spectrum of compound **7c**

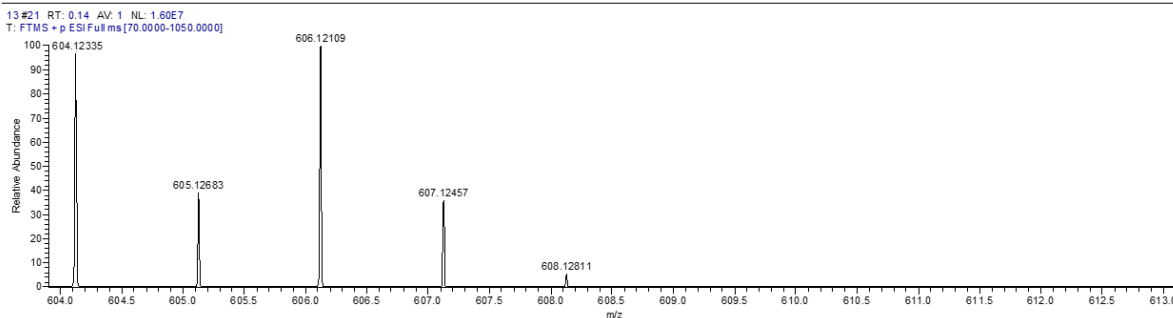

LC/MS Spectrum of compound **7d**

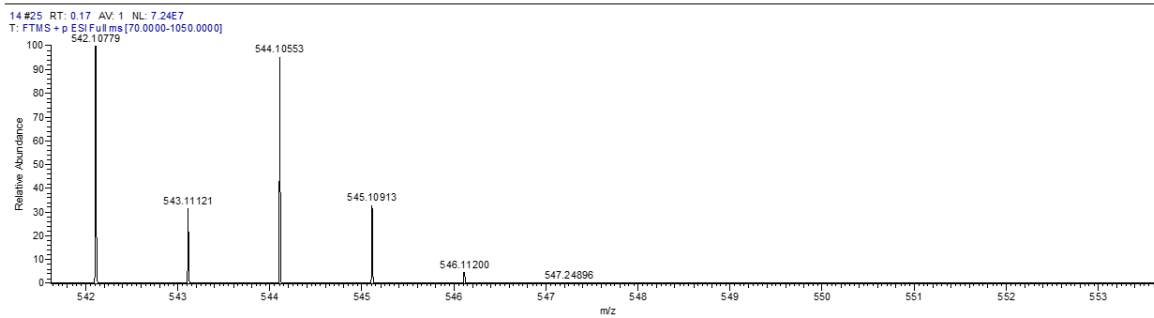

LC/MS Spectrum of compound 7e

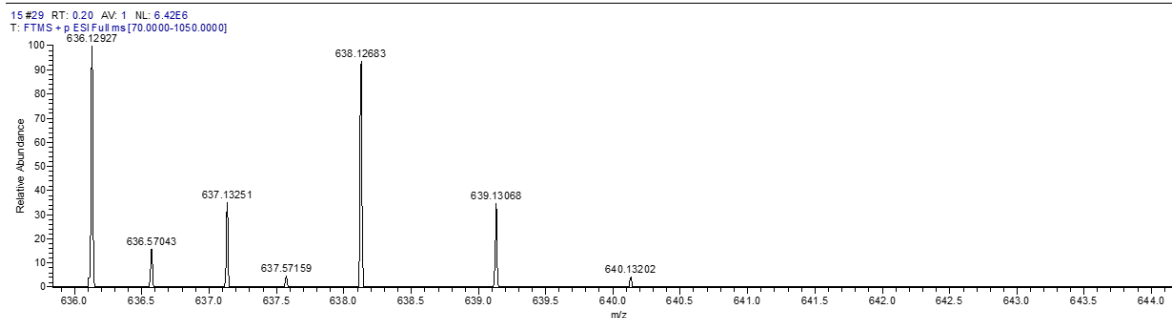

LC/MS Spectrum of compound 7f

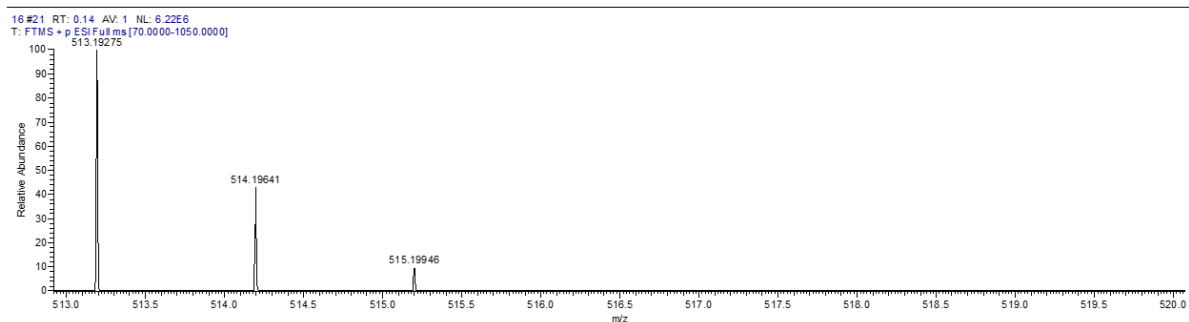

LC/MS Spectrum of compound 7g

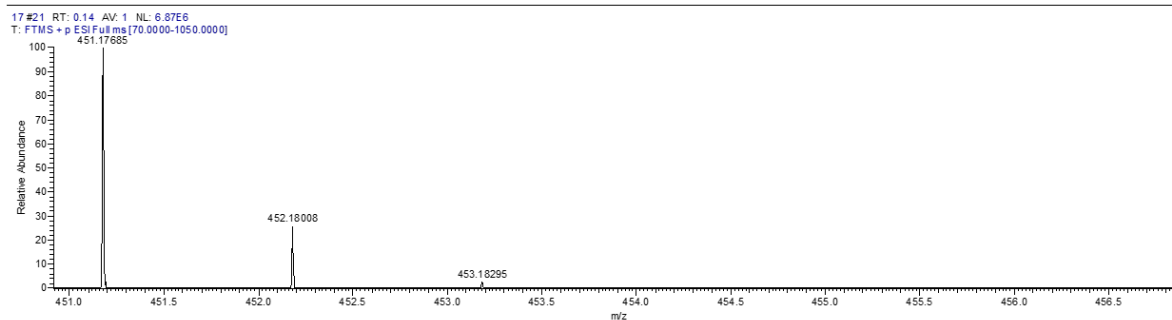

LC/MS Spectrum of compound 7h



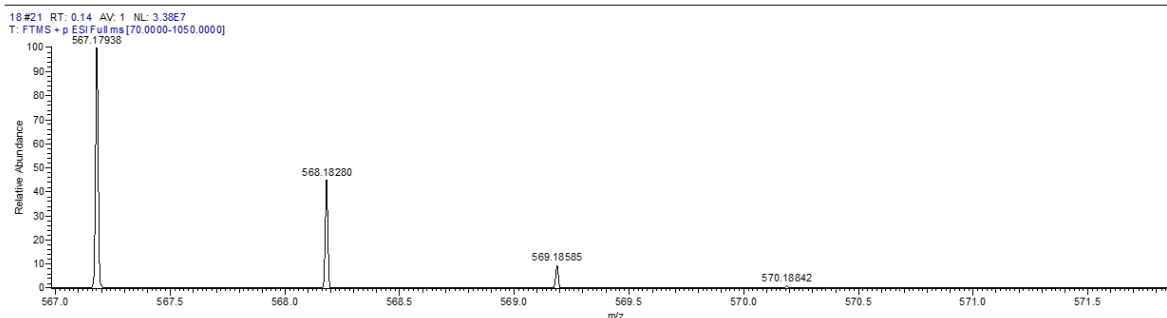

LC/MS Spectrum of compound 7i

User Spectra

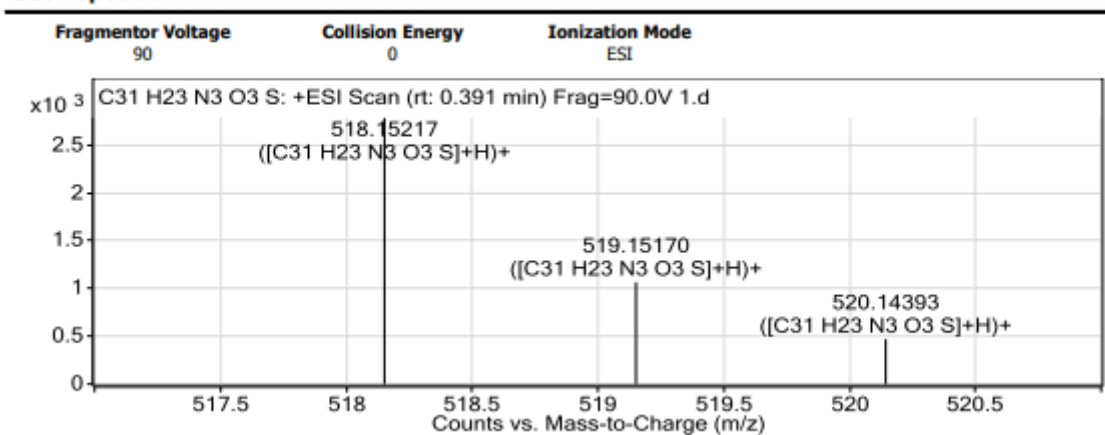

LC/MS Spectrum of compound 7j

User Spectra

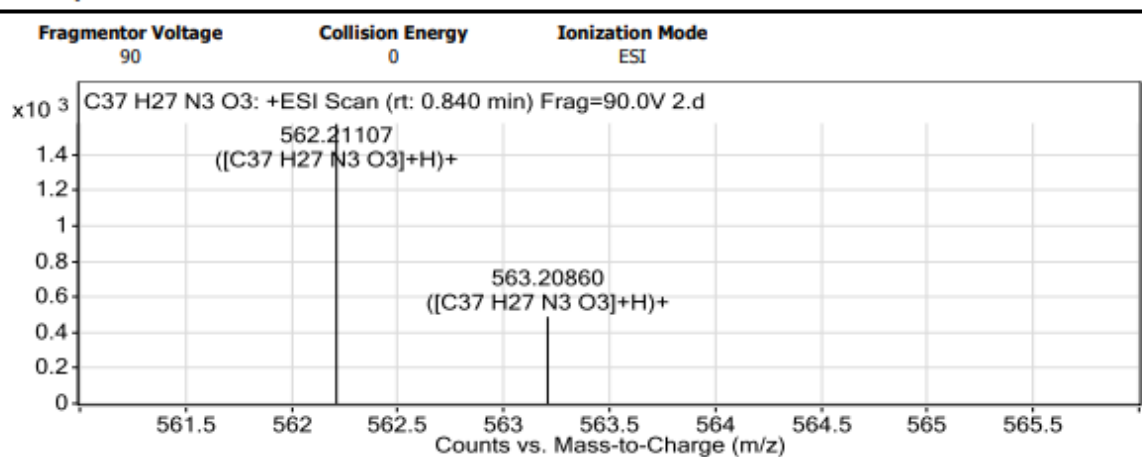

LC/MS Spectrum of compound 7k

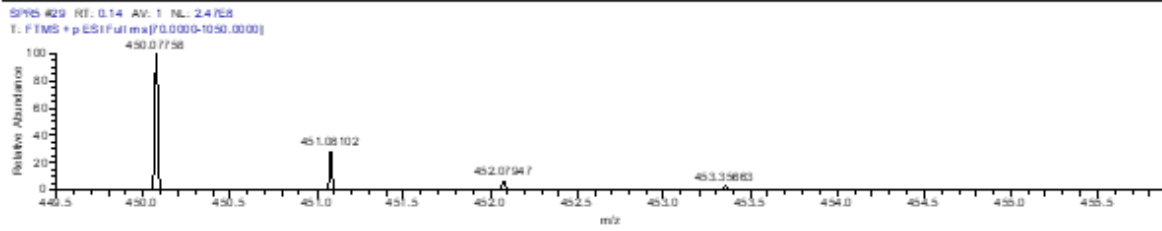

LC/MS Spectrum of compound **4d**

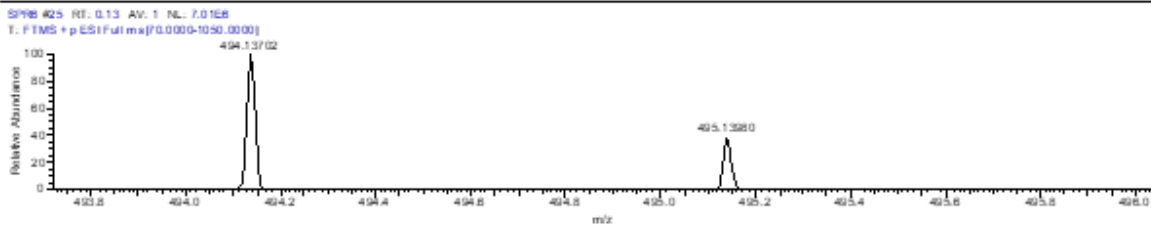

LC/MS Spectrum of compound **4e**
